# Supplementary material for: Brønsted acid-catalyzed synthesis of spirocyclobutanes via heteroannulation of vinyloxyphenylbicyclobutanes with water
Source: Royal Society of Chemistry journal article supplement (doi:10.1039/d4ob00451e), 2024-01-01
Supplement: d4ob00451e1.pdf [file d4ob00451e1.pdf]

## Supporting Information

### Brønsted acid-catalyzed synthesis of spirocyclobutanes *via* heteroannulation of vinyloxyphenylbicyclobutanes with water

Masaharu Takatsuki, Hiroshi Aoyama, Mitsuhiro Arisawa\*, Makoto Sako\*

Graduate School of Pharmaceutical Sciences, Osaka University, Yamada-oka 1-6, Suita, Osaka 565-0871, Japan.

E-mail: arisaw@phs.osaka-u.ac.jp; sako-m@phs.osaka-u.ac.jp

| Contents |                                     |     |
|----------|-------------------------------------|-----|
| 1.       | General Information                 | S1  |
| 2.       | Optimization of Reaction Conditions | S2  |
| 3.       | Mechanistic Studies                 | S5  |
| 4.       | Experimental Procedure              | S8  |
| 5.       | Computational Studies               | S15 |
| 6.       | References                          | S19 |
| 7.       | X-ray Crystallographic Analysis     | S20 |
| 8.       | NMR Spectra                         | S22 |

#### 1. General Information

- <sup>1</sup>H-, <sup>13</sup>C- and <sup>19</sup>F-NMR spectra were recorded by JEOL ECS 300, JEOL JNM-ECS 400 or JEOL JNMLA 500 spectrometers.

<sup>1</sup>H NMR spectra are reported as follows: chemical shift in ppm relative to the chemical shift of tetramethylsilane (TMS) at 0 ppm, integration, multiplicities (s = singlet, d = doublet, t = triplet, q = quartet, m = multiplet), and coupling constants (Hz).

<sup>13</sup>C NMR spectra are reported as follows: chemical shift in ppm relative to the chemical shift of triplet for CDCl<sub>3</sub> at 77 ppm, septet for acetone-d<sub>6</sub> at 29.8 ppm, multiplicities (s = singlet, d = doublet, t = triplet, q = quartet, m = multiplet), and coupling constants (Hz).

C<sub>6</sub>F<sub>6</sub> (singlet at -164.9 ppm) was used as an external standard for <sup>19</sup>F NMR.

- MALDI-MS spectra were obtained with JMS-S3000 (JEOL).
- Melting points were measured by BÜCHI B-545.
- Column chromatography on SiO<sub>2</sub> was performed with Kanto Chemical Silica Gel 60 (spherical, 63-210 μm or spherical, 40-50 μm).
- Commercially available organic and inorganic compounds were used without further purification.

## 2. Optimization of reaction conditions

### 2-1. Screening of Brønsted acid catalysts

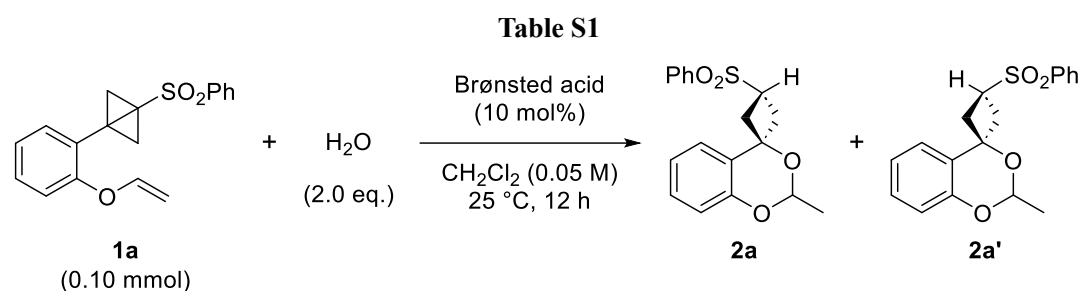

| entry | Brønsted acid                        | <b>2a/2a'</b> (% , <i>dr</i> ) <sup>a</sup> |
|-------|--------------------------------------|---------------------------------------------|
| 1     | TfOH                                 | 70% (0.31 : 1)                              |
| 2     | conc. HCl                            | <5%                                         |
| 3     | conc. H <sub>2</sub> SO <sub>4</sub> | 10% (0.16 : 1)                              |
| 4     | 60% HNO <sub>3</sub> aq.             | 73% (0.86 : 1)                              |
| 5     | HCOOH                                | 24% (0.30 : 1)                              |
| 6     | TFA                                  | <5%                                         |
| 7     | <i>p</i> -TSA•H <sub>2</sub> O       | 76% (0.61 : 1)                              |
| 8     | 60% HClO <sub>4</sub> aq.            | 94% (0.94 : 1)                              |
| 9     | 60% HClO <sub>4</sub> aq. (20 mol%)  | 95% (1.03 : 1)                              |
| 10    | 60% HClO <sub>4</sub> aq. (30 mol%)  | 98% (1.10 : 1)                              |

<sup>a</sup> NMR yield using 1,3,5-trimethoxybenzene as an internal standard.

### 2-2. Screening of Lewis acid catalysts

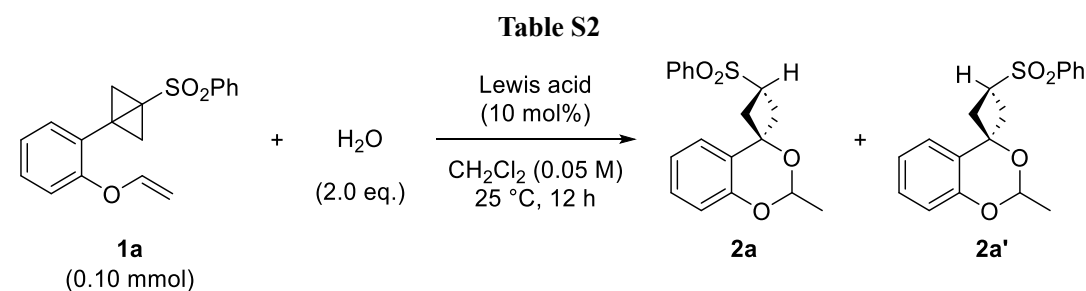

| entry | Lewis acid                           | <b>2a/2a'</b> (% , <i>dr</i> ) <sup>a</sup> |
|-------|--------------------------------------|---------------------------------------------|
| 1     | BF <sub>3</sub> •OEt <sub>2</sub>    | 70% (0.78 : 1)                              |
| 2     | CeCl <sub>3</sub> •7H <sub>2</sub> O | not detected                                |
| 3     | TiCl <sub>4</sub>                    | <5%                                         |
| 4     | AlCl <sub>3</sub> •6H <sub>2</sub> O | <5%                                         |
| 5     | Bi(OTf) <sub>3</sub>                 | 94% (0.94 : 1)                              |
| 6     | Yb(OTf) <sub>3</sub>                 | 81% (0.62 : 1)                              |

<sup>a</sup> NMR yield using 1,3,5-trimethoxybenzene as an internal standard.

### 2-3. Screening of solvents

**Table S3**

| entry | solvent                         | <b>2a/2a'</b> (%, <i>dr</i> ) <sup>a</sup> |
|-------|---------------------------------|--------------------------------------------|
| 0     | CH <sub>2</sub> Cl <sub>2</sub> | 98% (1.10 : 1)                             |
| 1     | CHCl <sub>3</sub>               | 38% (0.83 : 1)                             |
| 2     | PhMe                            | 84% (0.87 : 1)                             |
| 3     | MeNO <sub>2</sub>               | 55% (0.56 : 1)                             |
| 4     | EtOAc                           | 91% (0.50 : 1)                             |
| 5     | MeCN                            | 83% (0.88 : 1)                             |
| 6     | 1,4-dioxane                     | 90% (0.49 : 1)                             |
| 7     | DMSO                            | not detected                               |
| 8     | H <sub>2</sub> O                | no reaction                                |

<sup>a</sup> NMR yield using 1,3,5-trimethoxybenzene as an internal standard.

### 2-4. Screening of H<sub>2</sub>O loading

**Table S4**

| entry | X  | <b>2a/2a'</b> (%, <i>dr</i> ) <sup>a</sup> |
|-------|----|--------------------------------------------|
| 0     | 2  | 98% (1.10 : 1)                             |
| 1     | 0  | 45% (0.32 : 1)                             |
| 2     | 1  | 89% (0.39 : 1)                             |
| 3     | 3  | 90% (1.18 : 1)                             |
| 4     | 5  | 81% (0.96 : 1)                             |
| 5     | 10 | 48% (0.34 : 1)                             |

<sup>a</sup> NMR yield using 1,3,5-trimethoxybenzene as an internal standard.

## 2-5. Screening of nucleophiles

Table S5

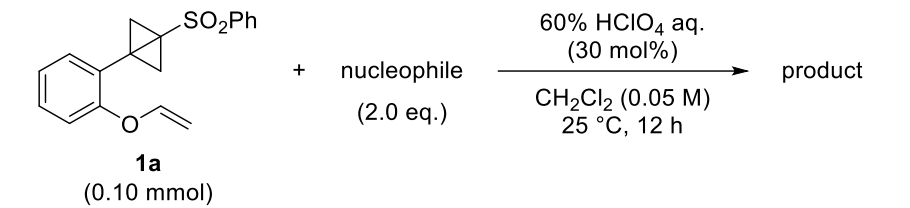

**1a**  
(0.10 mmol)

| entry | nucleophile          | results         |
|-------|----------------------|-----------------|
| 1     | H <sub>2</sub> N-Boc | complex mixture |
| 2     | H <sub>2</sub> N-Ts  | not detected    |
| 3     | H <sub>2</sub> N-Bn  | no reaction     |
| 4     | H <sub>2</sub> N-Ph  | no reaction     |
| 5     | AcONH <sub>4</sub>   | no reaction     |

### 3. Mechanistic Studies

#### 3-1. NMR time course experiments

We conducted a time-course experiment using NMR to collect any information to shed light on the reaction mechanism. A solution of **1a** (0.10 mmol), H<sub>2</sub>O (0.20 mmol) and 30 mol% of 60% HClO<sub>4</sub> in CD<sub>2</sub>Cl<sub>2</sub> was filled in an NMR tube. We recorded the <sup>1</sup>H-NMR spectra of this reaction mixture at 10 and 30 min and at 1, 2, 3, 6, and 9 h after the start of the reaction and compared each spectrum with those of standard samples of **1a**, **2a** and **2a'**.

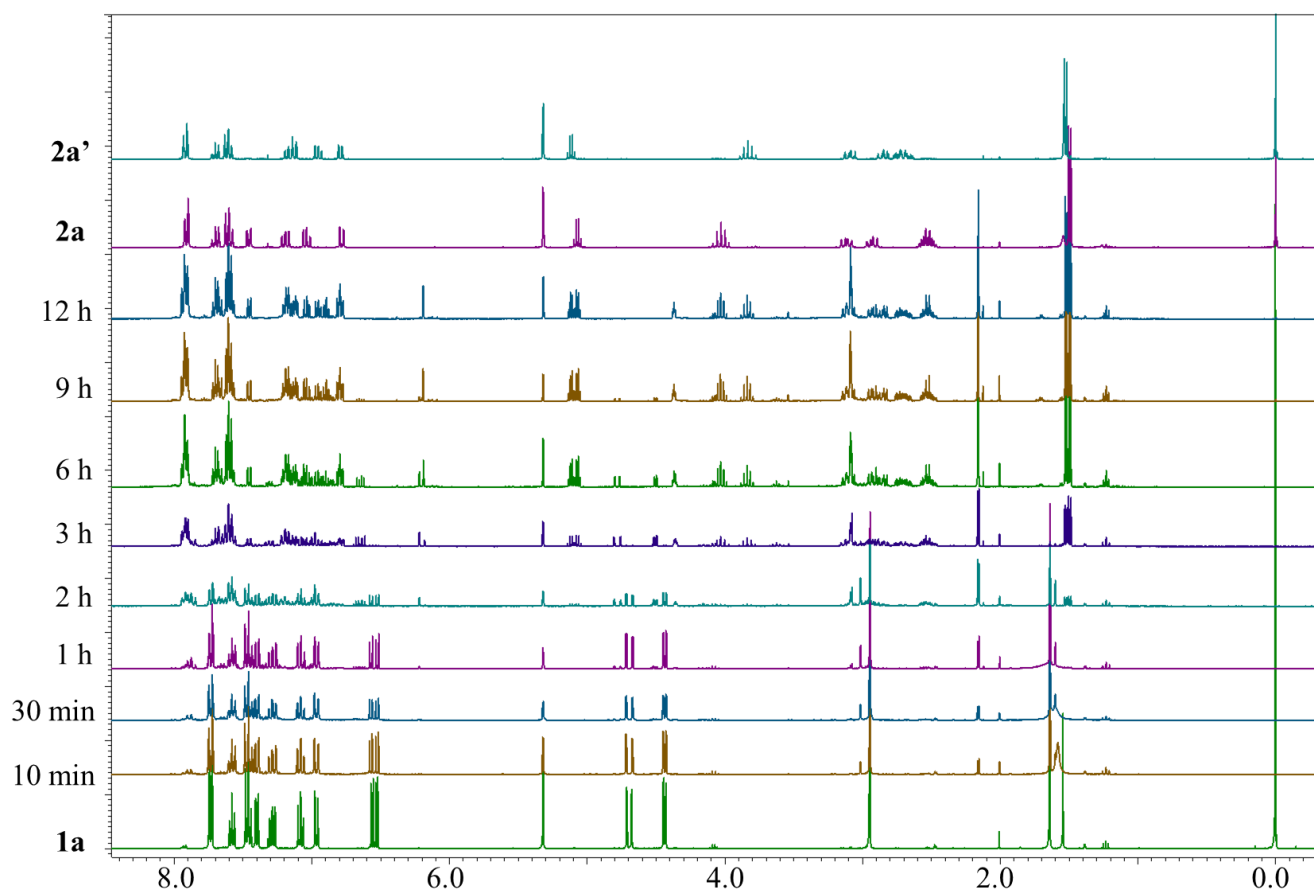

Figure S1

Several pathways from Int B to the products can be considered, and we have described the hypothesized reaction mechanisms (Scheme S1). Based on the NMR experiments above (Figure S1), we did not observe clear peaks attributable to a hemiacetal, benzylic cation, or benzylic alcohol. Therefore, we have chosen not to specify the structures of intermediates between **Int B** and the products in the reaction mechanism described in the main text (Scheme 3).

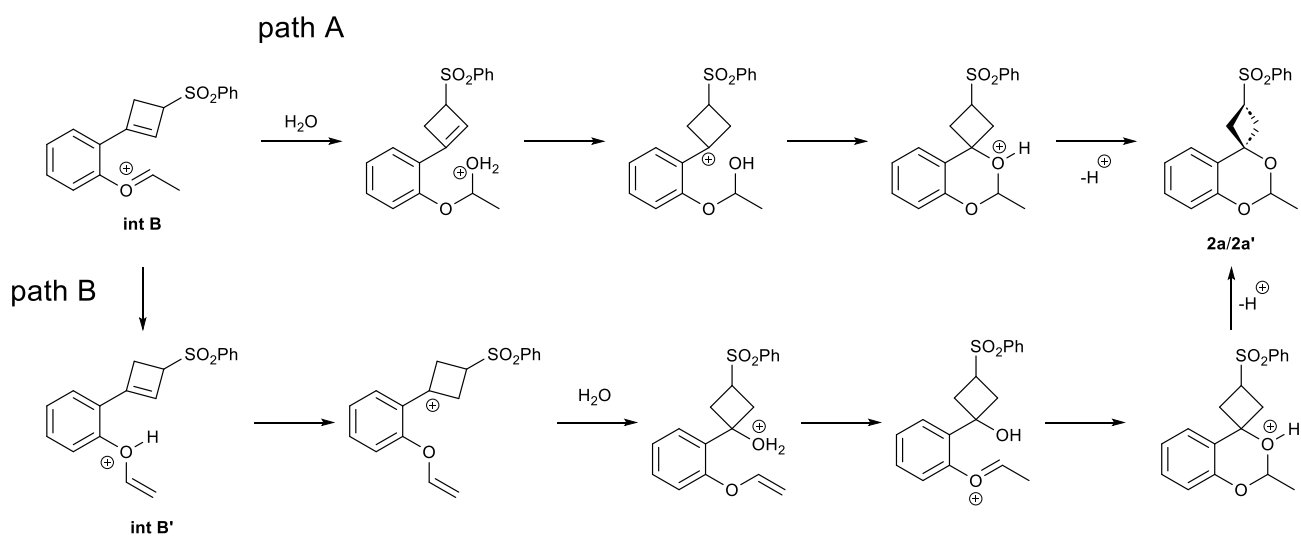

Scheme S1

### 3-2. Control experiments

The reaction using cyclobutene **5a** afforded the corresponding products **2a/2a'** smoothly (eq. S1).

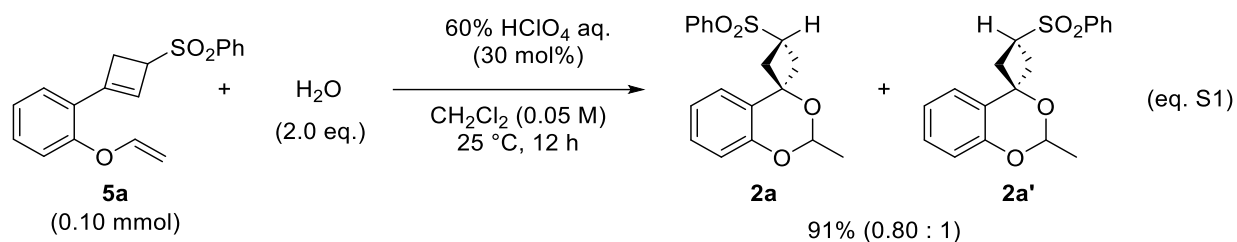

When the product **2a** or **2a'** was subjected to the heteroannulation reaction conditions, no epimerization and no decomposition were observed (eq. S2 and eq. S3).

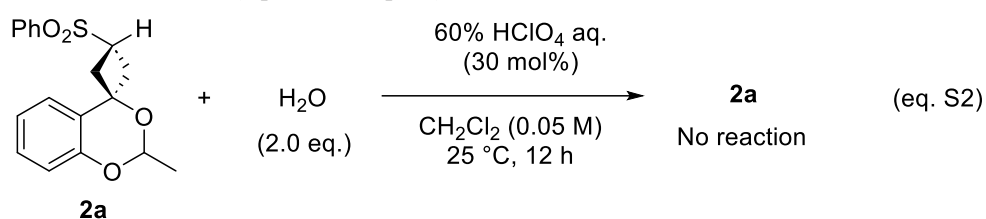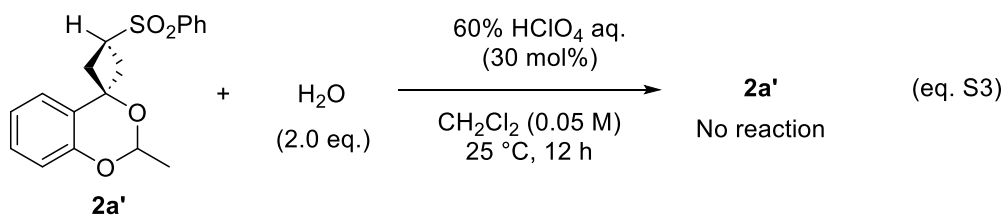

At lower reaction temperatures (0 °C, -40 °C, -78 °C), no products were obtained (eq. S4).

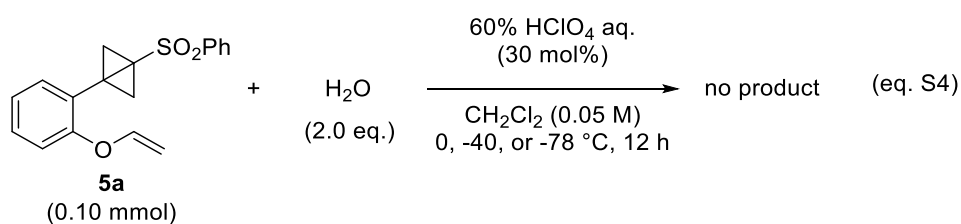

## 4. Experimental procedure

### 4-1. Preparation of starting materials

Starting materials **1a-1m** and **S1** were prepared through our reported method.<sup>1</sup>

Starting material **3** was prepared according to Scheme S2.

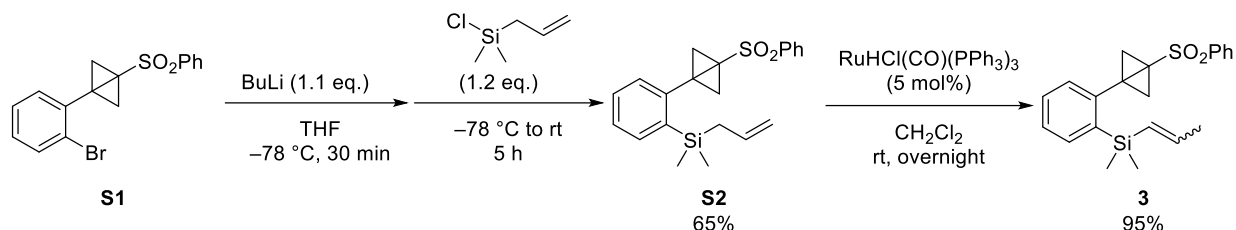

#### allyldimethyl(2-(3-(phenylsulfonyl)bicyclo[1.1.0]butan-1-yl)phenyl)silane (**S2**)

A flame dried round-bottom flask equipped with a magnetic stirring bar was charged with the compound **S1**<sup>1</sup> (1.05 g, 3.0 mmol) and dry THF (0.2 M) under N<sub>2</sub>. The resulting solution was cooled to -78 °C and added *n*-BuLi (2.08 mL, 1.6 M in hexane, 1.1 eq.) was added dropwise to the solution. The mixture was stirred for 30 min, then a solution of allyl(chloro)dimethylsilane (0.54 mL, 3.6 mmol, 1.2 eq.) was added, and the reaction was stirred at -78 °C before warming to rt. After 5 h, it was diluted with water and EtOAc. The combined organic layer was dried over anhydrous Na<sub>2</sub>SO<sub>4</sub> and filtered. The filtrate was evaporated in vacuo and the crude BCB derivatives purified by column chromatography on silica gel (hexane/EtOAc = 20:1) to get compound **S2** as white solid (1.11 g, 65%).

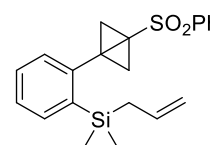

m.p. 75.3 - 76.2 °C

<sup>1</sup>H NMR (300 MHz, Acetone-*d*<sub>6</sub>) δ 7.99-7.96 (m, 2H), 7.89-7.86 (m, 1H), 7.75-7.63 (m, 3H), 7.57 (d, *J* = 7.2, 1.7 Hz, 1H), 7.41-7.30 (m, 2H), 5.80-5.66 (m, 1H), 4.88-4.75 (m, 2H), 2.56 (s, 2H), 1.81 (d, *J* = 8.3 Hz, 2H), 1.68 (s, 2H), 0.29 (s, 6H).

<sup>13</sup>C{<sup>1</sup>H} NMR (101 MHz, Acetone-*d*<sub>6</sub>) δ 143.5, 141.5, 138.4, 136.0, 135.5, 134.2, 130.3, 130.2, 129.7, 128.0, 127.9, 113.9, 41.4, 35.1, 34.4, 24.5, -1.7.

HRMS (MALDI) *m/z* calcd for C<sub>21</sub>H<sub>24</sub>O<sub>2</sub>NaSiS ([M+Na]<sup>+</sup>): 391.1158, found 391.1160.

#### (*E*)-dimethyl(2-(3-(phenylsulfonyl)bicyclo[1.1.0]butan-1-yl)phenyl)(prop-1-en-1-yl)silane (**3**)

A solution of **S2** (84.4 mg, 0.26 mmol, 1.0 eq.) in CH<sub>2</sub>Cl<sub>2</sub> (6.5 mL, 0.20 M) was added RuHCl(CO)(PPh<sub>3</sub>)<sub>3</sub> (12.3 mg, 0.0129 mmol, 5.0 mol%). The resulting mixture was stirred at room temperature for overnight. The reaction mixture was filtered and combined filtrate was concentrated. The residue was purified by a silica gel column chromatography (hexane/EtOAc = 15:1) to get compound **3** as white solid (80 mg, 95%).

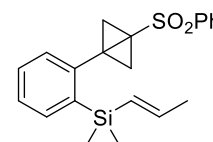

m.p. 95.7 – 96.5 °C

<sup>1</sup>H NMR (300 MHz, Acetone-*d*<sub>6</sub>) δ 7.99-7.95 (m, 2H), 7.87 (dd, *J* = 7.4, 1.5 Hz, 1H), 7.77-7.63 (m, 3H), 7.60 (d, *J* = 6.9 Hz, 1H), 7.42-7.31 (m, 2H), 6.18-6.05 (m, 1H), 5.81 (m, 1H), 2.53 (s, 2H), 1.80 (dd, *J* = 4.8, 1.4 Hz, 3H), 1.58 (s, 2H), 0.33 (s, 7H).



$^{13}\text{C}\{^1\text{H}\}$  NMR (76 MHz, Acetone- $d_6$ )  $\delta$  144.1, 143.5, 142.1, 138.4, 136.1, 134.1, 131.0, 130.2, 130.1, 129.5, 127.9, 127.9, 41.5, 35.1, 34.7, 22.7, -1.0

HRMS (MALDI)  $m/z$  calcd for  $\text{C}_{21}\text{H}_{24}\text{O}_2\text{NaSiS}$  ( $[\text{M}+\text{Na}]^+$ ): 391.1158, found 391.1154.

Cyclobutene derivative **5a** was prepared according to Scheme S3.

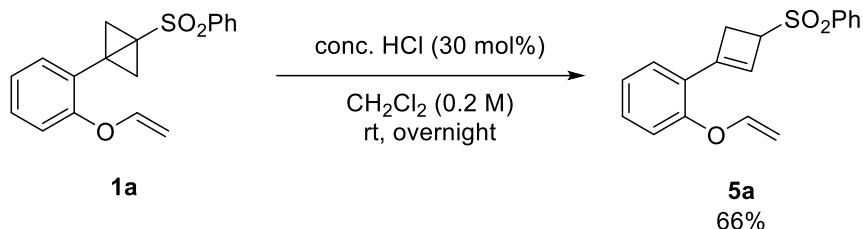

Scheme S3

#### 1-(3-(phenylsulfonyl)cyclobut-1-en-1-yl)-2-(vinylloxy)benzene (**5a**)

A solution of **1a** (31.2 mg, 0.10 mmol) in  $\text{CH}_2\text{Cl}_2$  (2.0 mL, 0.20 M) was added a conc. HCl (3.3  $\mu\text{L}$ , 0.030 mmol, 30 mol%). The resulting mixture was stirred at room temperature for overnight. It was diluted with water and EtOAc. The combined organic layer was dried over anhydrous  $\text{Na}_2\text{SO}_4$  and filtered. The filtrate was evaporated in vacuo and the crude mixture was purified by column chromatography on silica gel (hexane/EtOAc = 20:1) to get compound **5a** as colorless oil (21 mg, 66%).

$^1\text{H}$  NMR (400 MHz, Acetone- $d_6$ )  $\delta$  7.98-7.91 (m, 2H), 7.78-7.63 (m, 3H), 7.42-7.30 (m, 2H), 7.17-7.07 (m, 2H), 6.84-6.77 (m, 1H), 6.24 (d,  $J = 0.9$  Hz), 4.77 (dd,  $J = 1.7, 13$  Hz), 4.52-4.49 (dd,  $J = 1.4, 6.2$  Hz), 3.15-3.02 (m, 2H),

$^{13}\text{C}\{^1\text{H}\}$  NMR (101 MHz, Acetone- $d_6$ )  $\delta$  156.1, 148.6, 147.8, 139.6, 134.5, 131.4, 130.0, 129.3, 128.5, 125.9, 124.0, 116.9, 95.9, 61.8, 40.8, 32.5.

HRMS (MALDI)  $m/z$  calcd for  $\text{C}_{18}\text{H}_{16}\text{NaO}_3\text{S}$  ( $[\text{M}+\text{Na}]^+$ ): 335.0712, found 335.0709.

#### 4-2. Brønsted acid-catalyzed heteroannulation reaction

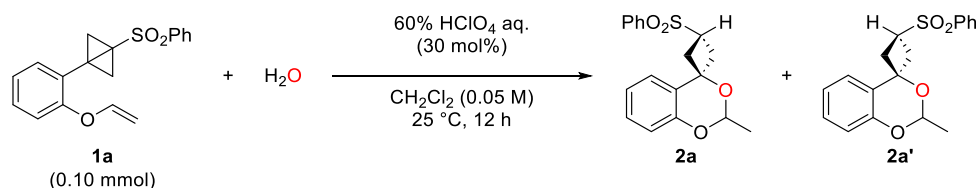

#### General procedure

A flame dried test tube equipped with magnetic stirring bar charged with a 60%  $\text{HClO}_4$  aq. (30 mol%) under  $\text{N}_2$  and added dry  $\text{CH}_2\text{Cl}_2$  (2 mL, 0.05 M). Subsequently,  $\text{H}_2\text{O}$  (3.6  $\mu\text{L}$ , 0.20 mmol, 2.0 eq.) was added to resulting solution at ambient temperature. The mixture was stirred at 25 °C for 5 min, and then the compound **1** (0.10 mmol) was added. After 12 h, the mixture was filtered through a short pad of silica gel. The obtained residue was purified by flash column chromatography on silica gel (hexane/EtOAc) to give compounds **2** and **2'**.

**(3'r,4r)-2-methyl-3'-(phenylsulfonyl)spiro[benzo[d][1,3]dioxine-4,1'-cyclobutane] (2a)**

49% yield, pale yellow solid, m.p. 149.5-150.3 °C.

<sup>1</sup>H NMR (400 MHz, CDCl<sub>3</sub>) δ 7.94-7.92 (m, 2H), 7.70-7.66 (m, 1H), 7.61-7.57 (m, 2H), 7.49 (dd, *J* = 7.8, 1.4 Hz, 1H), 7.22-7.17 (m, 1H), 7.04 (td, *J* = 7.6, 1.1 Hz, 1H), 6.81 (dd, *J* = 8.0, 1.1 Hz, 1H), 5.06 (q, *J* = 5.1 Hz, 1H), 4.07-3.99 (m, 1H), 3.16 (dd, *J* = 13.1, 8.9 Hz, 1H), 2.99 (dd, *J* = 13.1, 8.9 Hz, 1H), 2.62-2.48 (m, 2H), 1.52 (d, *J* = 5.1 Hz, 3H).

<sup>13</sup>C{<sup>1</sup>H} NMR (101 MHz, CDCl<sub>3</sub>) δ 152.2, 138.0, 133.9, 129.4, 129.0, 128.2, 126.3, 125.6, 121.9, 116.3, 93.1, 75.3, 50.9, 39.5, 37.1, 20.7.

HRMS (MALDI) *m/z* calcd for C<sub>18</sub>H<sub>28</sub>O<sub>4</sub>NaS ([M+Na]<sup>+</sup>): 353.0818, found 353.0820.

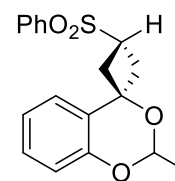

**(3's,4s)-2-methyl-3'-(phenylsulfonyl)spiro[benzo[d][1,3]dioxine-4,1'-cyclobutane] (2a')**

49% yield, pale yellow solid, m.p. 139.1-141.1 °C.

<sup>1</sup>H NMR (400 MHz, CDCl<sub>3</sub>) δ 7.95-7.93 (m, 2H), 7.71-7.66 (m, 1H), 7.62-7.57 (m, 2H), 7.19-7.15 (m, 1H), 7.09 (dd, *J* = 7.8, 1.3 Hz, 1H), 6.94 (td, *J* = 7.6, 1.3 Hz, 1H), 6.81 (dd, *J* = 8.2 Hz, 1H), 5.11 (q, *J* = 5.0 Hz, 1H), 3.85-3.77 (m, 1H), 3.20-3.15 (m, 1H), 2.93-2.88 (m, 1H), 2.78-2.66 (m, 2H), 1.54 (d, *J* = 5.0 Hz, 3H).

<sup>13</sup>C{<sup>1</sup>H} NMR (101 MHz, CDCl<sub>3</sub>) δ 151.9, 137.9, 133.9, 129.4, 128.8, 128.4, 126.4, 123.3, 121.6, 116.8, 92.7, 72.1, 49.6, 40.4, 37.3, 20.7.

HRMS (MALDI) *m/z* calcd for C<sub>18</sub>H<sub>18</sub>O<sub>4</sub>NaS ([M+Na]<sup>+</sup>): 353.0818, found 353.0817.

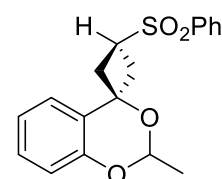

**6-methoxy-2-methyl-3'-(phenylsulfonyl)spiro[benzo[d][1,3]dioxine-4,1'-cyclobutane] (2b, 2b')** (diastereo mixture)  
quant. (2b/2b' = 0.68 : 1), colorless oil.

<sup>1</sup>H NMR (300 MHz, CDCl<sub>3</sub>) δ 7.91-7.88 (m, 2H), 7.68-7.61 (m, 1H), 7.58-7.52 (m, 2H), 7.07 (d, *J* = 2.4 Hz, 0.43H), 6.76-6.68 (m, 2H), 6.60 (m, 0.56H), 5.02 (q, *J* = 4.7 Hz, 0.58H), 4.97 (q, *J* = 5.0 Hz, 0.46H), 4.00 (quin., *J* = 8.6 Hz, 0.66H), 3.79 (m, 2.3H), 3.71 (s, 1.2H), 3.13 (dd, *J* = 13.2, 8.6 Hz, 1H), 2.97 (dd, *J* = 13.2, 8.6 Hz, 0.54H), 2.85 (dd, *J* = 12.0, 8.6 Hz, 0.52H), 2.75-2.44 (m, 2H), 1.49-1.46 (m, 3H).

<sup>13</sup>C{<sup>1</sup>H} NMR (101 MHz, CDCl<sub>3</sub>) δ 154.3, 154.1, 146.1, 145.8, 137.8, 137.7, 133.8, 133.8, 129.3, 128.2, 128.1, 127.0, 126.1, 117.2, 117.0, 115.5, 113.6, 110.2, 109.1, 93.0, 92.6, 75.1, 72.0, 55.7, 50.7, 49.5, 40.3, 39.4, 37.1, 37.0, 20.6, 20.5.

HRMS (MALDI) *m/z* calcd for C<sub>19</sub>H<sub>20</sub>O<sub>5</sub>NaS ([M+Na]<sup>+</sup>): 383.0924, found 383.0925.

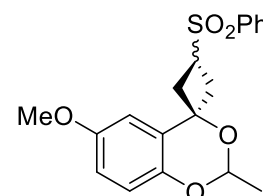

**2,6-dimethyl-3'-(phenylsulfonyl)spiro[benzo[d][1,3]dioxine-4,1'-cyclobutane] (2c, 2c')** (diastereo mixture)  
quant. (2c/2c' = 1.03 : 1), colorless oil.

<sup>1</sup>H NMR (400 MHz, CDCl<sub>3</sub>) δ 7.95-7.91 (m, 2H), 7.70-7.65 (m, 1H), 7.60-7.56 (m, 2H), 7.17 (d, *J* = 1.4 Hz, 0.51H), 6.99-6.94 (m, 1H), 6.85 (d, *J* = 1.8 Hz, 0.50H), 6.69 (dd, *J* = 8.2, 1.8 Hz, 1H), 5.06 (q, *J* = 5.0 Hz, 0.50H), 5.01 (q, *J* = 5.0 Hz, 0.49H), 4.06-3.97 (m, 0.51H), 3.85-3.76 (m, 0.52H), 3.17-3.10 (m, 1H), 2.97-2.85 (m, 1H), 2.75-2.64 (m, 1H),

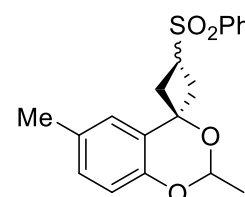

2.58-2.44 (m, 1H), 2.29-2.38 (s, 1.5H), 2.20-2.29 (s, 1.5H), 1.50 (m, 3H).

$^{13}\text{C}\{^1\text{H}\}$  NMR (101 MHz,  $\text{CDCl}_3$ )  $\delta$  150.1, 149.7, 137.9, 137.9, 133.9, 133.9, 131.2, 130.9, 129.7, 129.5, 129.4, 128.4, 128.3, 126.3, 126.0, 125.2, 123.5, 116.5, 116.1, 93.1, 92.6, 75.3, 72.1, 51.1, 49.6, 40.4, 39.5, 37.2, 37.1, 20.8, 20.8, 20.7, 20.7.

**HRMS (MALDI)**  $m/z$  calcd for  $\text{C}_{19}\text{H}_{20}\text{O}_4\text{NaS}$  ( $[\text{M}+\text{Na}]^+$ ): 367.0975, found 367.0971.

---

6-fluoro-2-methyl-3'-(phenylsulfonyl)spiro[benzo[d][1,3]dioxine-4,1'-cyclobutane] (**2d**, **2d'**) (diastereo mixture)

95% yield (**2d/2d'** = 0.62 : 1), colorless oil.

$^1\text{H}$  NMR (400 MHz,  $\text{CDCl}_3$ )  $\delta$  7.94-7.91 (m, 1H), 7.70-7.67 (m, 1H), 7.61-7.57 (m, 1H), 7.19 (dd,  $J$  = 8.9, 3.0 Hz, 0.65H), 6.92-6.85 (m, 1H), 6.81-6.78 (m, 0.34H), 6.78-6.73 (m, 1H), 5.06 (q,  $J$  = 5.2 Hz, 0.38H), 5.01 (q,  $J$  = 5.2 Hz, 0.62H), 4.07-3.98 (m, 0.66H), 3.82-3.73 (m, 0.38H), 3.18 (dd,  $J$  = 13.3, 9.2 Hz, 0.40H), 3.09 (dd,  $J$  = 13.3, 8.7 Hz, 0.66H), 2.98-2.88 (m, 1H), 2.76-2.48 (m, 2H), 1.53 (d,  $J$  = 5.0 Hz, 1.2H), 1.51 (d,  $J$  = 5.5 Hz, 1.8H).

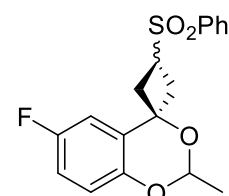

$^{13}\text{C}\{^1\text{H}\}$  NMR (101 MHz,  $\text{CDCl}_3$ )  $\delta$  157.5 (d,  $J_{\text{C-F}}$  = 241 Hz), 157.3 (d,  $J_{\text{C-F}}$  = 241 Hz), 148.4, 148.1, 137.9, 137.9, 134.1, 129.6, 128.5, 128.4, 127.3 (d,  $J_{\text{C-F}}$  = 6.7 Hz), 126.7 (d,  $J_{\text{C-F}}$  = 6.7 Hz), 118.1 (d,  $J_{\text{C-F}}$  = 7.7 Hz), 117.6 (d,  $J_{\text{C-F}}$  = 7.7 Hz), 116.2 (d,  $J_{\text{C-F}}$  = 23 Hz), 115.9 (d,  $J_{\text{C-F}}$  = 23 Hz), 112.6 (d,  $J_{\text{C-F}}$  = 24 Hz), 109.8 (d,  $J_{\text{C-F}}$  = 24 Hz), 93.4, 93.0, 75.1, 72.1, 50.8, 49.5, 40.4, 39.5, 37.3, 37.2, 20.7, 20.7.

$^{19}\text{F}$  NMR (283 MHz,  $\text{CDCl}_3$ )  $\delta$  -123.642, -124.378.

**HRMS (MALDI)**  $m/z$  calcd for  $\text{C}_{18}\text{H}_{17}\text{O}_4\text{NaS}$  ( $[\text{M}+\text{Na}]^+$ ): 371.0724, found 371.0725.

---

2-methyl-6-nitro-3'-(phenylsulfonyl)spiro[benzo[d][1,3]dioxine-4,1'-cyclobutane] (**2e**, **2e'**) (diastereo mixture)

quant. (**2e/2e'** = 0.32 : 1), colorless oil.

$^1\text{H}$  NMR (400 MHz,  $\text{CDCl}_3$ )  $\delta$  8.35 (d,  $J$  = 2.7 Hz, 0.74H), 8.10-8.06 (m, 1H), 8.02 (d,  $J$  = 2.7 Hz, 0.34H), 7.96-7.93 (m, 2H), 7.73-7.68 (m, 1H), 7.63-7.59 (m, 2H), 6.92-6.88 (m, 1H), 5.21 (q,  $J$  = 5.0 Hz, 0.26H), 5.13 (q,  $J$  = 5.2 Hz, 0.71H), 4.10-4.01 (m, 0.73H), 3.94-3.85 (m, 0.22H), 3.27-3.21 (m, 0.23H), 3.16 (dd,  $J$  = 13.3, 8.7 Hz, 0.76H), 3.00-2.93 (m, 1H), 2.78-2.55 (m, 2H), 1.60 (d,  $J$  = 5.0 Hz, 0.70H), 1.57 (d,  $J$  = 5.0 Hz, 2.1H).

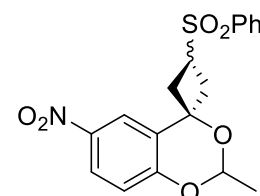

$^{13}\text{C}\{^1\text{H}\}$  NMR (101 MHz,  $\text{CDCl}_3$ )  $\delta$  157.3, 157.2, 142.1, 141.7, 137.6, 137.3, 134.2, 129.6, 129.5, 128.4, 126.6, 125.8, 124.9, 122.6, 119.8, 117.6, 117.2, 93.9, 93.6, 75.1, 72.2, 50.6, 48.9, 39.7, 39.3, 36.9, 36.7, 20.5, 20.4.

**HRMS (MALDI)**  $m/z$  calcd for  $\text{C}_{18}\text{H}_{17}\text{NO}_6\text{NaS}$  ( $[\text{M}+\text{Na}]^+$ ): 398.0669, found 398.0666.

---

8-chloro-2-methyl-3'-(phenylsulfonyl)spiro[benzo[d][1,3]dioxine-4,1'-cyclobutane] (**2f**, **2f'**) (diastereo mixture)

86% yield (**2f/2f'** = 0.66 : 1), colorless oil.

$^1\text{H}$  NMR (400 MHz,  $\text{CDCl}_3$ )  $\delta$  7.93-7.89 (m, 2H), 7.69-7.65 (m, 1H), 7.60-7.55 (m, 2H), 7.43 (dd,  $J$  = 7.8, 1.4 Hz, 0.58H), 7.27-7.22 (m, 1H), 7.00-6.94 (m, 1H), 6.86 (t,  $J$  = 8.0 Hz, 0.36H), 5.15 (q,  $J$  = 5.2 Hz, 0.40H), 5.08 (q,  $J$  = 5.2 Hz, 0.58H), 4.06-3.97 (m, 0.59H), 3.83-3.74 (m, 0.37H), 3.20-3.12 (m, 1H), 3.01-2.95 (m, 0.58H), 2.92-2.87 (m, 0.36H), 2.75-2.48 (m, 2H), 1.59 (m, 3H).

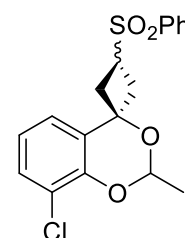

$^{13}\text{C}\{^1\text{H}\}$  NMR (101 MHz,  $\text{CDCl}_3$ )  $\delta$  148.3, 148.0, 137.9, 137.7, 134.0, 134.0, 129.4, 129.4, 129.3, 128.4, 128.2, 127.9, 127.3, 124.8, 121.9, 121.6, 121.6, 121.1, 93.8, 93.5, 75.1, 72.1, 50.8, 49.4, 40.2, 39.5, 37.1, 20.6, 20.5.

HRMS (MALDI)  $m/z$  calcd for  $\text{C}_{18}\text{H}_{17}\text{O}_4\text{Na}\text{SO}_2$  ( $[\text{M}+\text{Na}]^+$ ): 387.0428, found 387.0424.

2'-methyl-3-(phenylsulfonyl)spiro[cyclobutane-1,4'-naphtho[2,3-d][1,3]dioxine] (**2g**, **2g'**) (diastereo mixture)

95% yield (**2g/2g'** = 0.62 : 1), colorless oil.

$^1\text{H}$  NMR (300 MHz,  $\text{CDCl}_3$ )  $\delta$  7.99-7.96 (m, 2.7H), 7.93 (s, 0.70H), 7.73-7.57 (m, 4.7H), 7.45-7.29 (m, 2.1H), 7.20 (s, 1H), 5.23 (q,  $J = 5.2$  Hz, 0.37H), 5.16 (q,  $J = 5.0$  Hz, 0.59H), 4.14-4.05 (m, 0.62H), 4.02-3.94 (m, 0.40H), 3.35-3.23 (m, 1H), 3.10-2.95 (m, 1H), 2.90-2.60 (m, 2H), 1.61-1.57 (m, 3H).

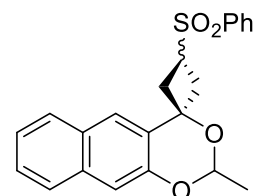

$^{13}\text{C}\{^1\text{H}\}$  NMR (101 MHz,  $\text{CDCl}_3$ )  $\delta$  150.3, 150.0, 137.9, 137.8, 134.0, 133.9, 133.8, 129.4, 129.1, 128.8, 128.4, 128.3, 128.0, 127.9, 127.4, 127.1, 126.7, 126.6, 126.6, 126.4, 126.0, 124.3, 122.4, 111.7, 111.3, 93.3, 92.9, 75.7, 72.5, 51.0, 49.7, 40.7, 40.2, 37.8, 37.6, 20.9, 20.8.

HRMS (MALDI)  $m/z$  calcd for  $\text{C}_{22}\text{H}_{20}\text{O}_4\text{Na}\text{S}$  ( $[\text{M}+\text{Na}]^+$ ): 403.0975, found 403.0973.

2-ethyl-3'-(phenylsulfonyl)spiro[benzo[d][1,3]dioxine-4,1'-cyclobutane] (**2h**, **2h'**) (diastereo mixture)

88% (**2h/2h'** = 0.82 : 1), colorless oil.

$^1\text{H}$  NMR (400 MHz,  $\text{CDCl}_3$ )  $\delta$  7.95-7.92 (m, 2H), 7.70-7.65 (m, 1H), 7.61-7.56 (m, 2H), 7.49-7.47 (m, 0.57H), 7.27-7.23 (m, 2H), 7.09 (dd,  $J = 7.8, 1.8$  Hz, 0.45H), 7.0-7.01 (m, 1H), 6.95-6.92 (m, 0.45H), 6.83-6.80 (m, 1H), 4.88 (t,  $J = 5.0$  Hz, 0.41H), 4.83 (t,  $J = 5.0$  Hz, 0.50H), 4.06-3.98 (m, 0.51H), 3.87-3.78 (m, 0.47H), 3.16 (dd,  $J = 13.3, 9.2$  Hz, 1H), 3.00-2.97 (m, 0.52H), 2.88-2.83 (m, 0.43H), 2.78-2.66 (m, 1H), 2.62-2.47 (m, 1H), 1.89-1.77 (m, 2H), 1.07-1.01 (m, 3H).

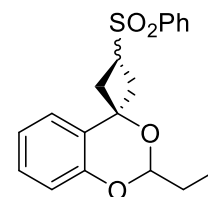

$^{13}\text{C}\{^1\text{H}\}$  NMR (101 MHz,  $\text{Acetone-}d_6$ )  $\delta$  152.5, 152.2, 138.1, 138.0, 134.0, 134.0, 129.5, 129.1, 129.0, 128.9, 128.5, 128.3, 126.7, 126.4, 126.0, 125.4, 123.4, 121.9, 121.6, 116.9, 116.5, 97.0, 96.5, 75.4, 72.3, 51.1, 49.7, 40.5, 39.5, 37.4, 37.3, 27.5, 27.5, 21.6, 8.0, 7.9.

HRMS (MALDI)  $m/z$  calcd for  $\text{C}_{19}\text{H}_{20}\text{O}_4\text{Na}\text{S}$  ( $[\text{M}+\text{Na}]^+$ ): 367.0975, found 367.0974.

2-methyl-3'-tosylspiro[benzo[d][1,3]dioxine-4,1'-cyclobutane] (**2i**, **2i'**) (diastereo mixture)

85% yield (**2i/2i'** = 0.58 : 1), colorless oil.

$^1\text{H}$  NMR (400 MHz,  $\text{CDCl}_3$ )  $\delta$  7.82-7.79 (m, 2H), 7.49 (dd,  $J = 7.8, 1.4$  Hz, 0.51H), 7.37 (dd,  $J = 8.2, 2.7$  Hz, 2H), 7.21-7.14 (m, 1H), 7.09 (dd,  $J = 8.0, 1.6$  Hz, 0.29H), 7.06-7.02 (m, 0.57H), 6.96-6.92 (m, 0.33H), 6.82-6.79 (m, 1H), 5.11 (q,  $J = 5.0$  Hz, 0.34H), 5.06 (q,  $J = 5.0$  Hz, 0.58H), 4.05-3.96 (m, 0.57H), 3.83-3.74 (m, 0.34H), 3.18-3.12 (m, 1H), 3.00-2.95 (m, 0.59H), 2.91-2.86 (m, 0.33H), 2.76-2.65 (m, 1H), 2.61-2.48 (m, 1H), 2.46 (s, 3H), 1.54 (d,  $J = 5.0$  Hz, 1.1H), 1.52 (d,  $J = 5.0$  Hz, 1.9H).

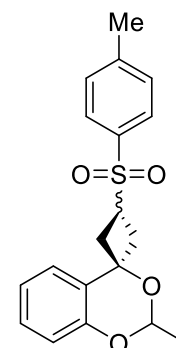

$^{13}\text{C}\{^1\text{H}\}$  NMR (101 MHz,  $\text{CDCl}_3$ )  $\delta$  152.2, 151.9, 144.9, 144.9, 135.0, 134.9, 130.0, 128.9, 128.8, 128.4, 128.2, 126.4, 126.4, 125.7, 123.3, 121.9, 121.6, 116.7, 116.3, 93.1, 92.7, 75.2, 72.1, 51.0, 49.6, 40.4, 39.5, 37.3, 37.1, 21.6, 20.7, 20.7.

**HRMS (MALDI)**  $m/z$  calcd for  $C_{19}H_{20}O_4NaS$  ( $[M+Na]^+$ ): 367.0975, found 367.0975.

3'-((4-methoxyphenyl)sulfonyl)-2-methylspiro[benzo[d][1,3]dioxine-4,1'-cyclobutane] (**2j**, **2j'**) (diastereo mixture) quant. (**2j/2j'** = 0.62 : 1), colorless oil.

**$^1H$  NMR** (400 MHz,  $CDCl_3$ )  $\delta$  7.87-7.82 (m, 2H), 7.48 (dd,  $J = 7.8, 1.4$  Hz, 0.62H), 7.21-7.14 (m, 1H), 7.09 (dd,  $J = 7.8, 1.4$  Hz, 0.39H), 7.04-7.01 (m, 3H), 6.96-6.91 (m, 0.38H), 6.81-6.76 (m, 1H), 5.11 (q,  $J = 5.2$  Hz, 0.39H), 5.06 (q,  $J = 5.2$  Hz, 0.61H), 4.03-3.95 (m, 0.54H), 3.88 (s, 3H), 3.82-3.74 (m, 0.41H), 3.16-3.10 (m, 1H), 2.96 (dd,  $J = 13.1, 8.9$  Hz, 0.63H), 2.86 (dd,  $J = 12.4, 8.7$  Hz, 0.39H), 2.76-2.64 (m, 0.88H), 2.61-2.47 (m, 1.2H), 1.54-1.51 (m, 3H).

**$^{13}C\{^1H\}$  NMR** (101 MHz, Acetone- $d_6$ )  $\delta$  163.9, 163.9, 152.2, 151.9, 130.5, 130.4, 129.4, 129.3, 128.9, 128.8, 126.5, 126.4, 125.7, 123.3, 121.8, 121.6, 116.7, 116.2, 114.6, 93.1, 92.7, 75.2, 72.1, 55.7, 51.1, 49.8, 40.4, 39.6, 37.3, 37.1, 20.7, 20.7.

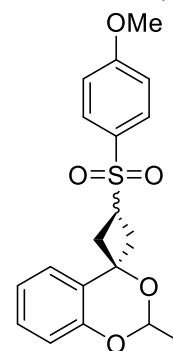

**HRMS (MALDI)**  $m/z$  calcd for  $C_{19}H_{20}O_5NaS$  ( $[M+Na]^+$ ): 383.0924, found 383.0921.

(3'r,4r)-*N,N*-diisopropyl-2-methylspiro[benzo[d][1,3]dioxine-4,1'-cyclobutane]-3'-carboxamide (**2k**)

38% yield, colorless oil. (minor product)

**$^1H$  NMR** (400 MHz, Acetone- $d_6$ )  $\delta$  7.50-7.48 (m, 1H), 7.17-7.13 (m, 1H), 6.99-6.94 (m, 1H), 6.75 (d,  $J = 8.2$  Hz, 1H), 5.19 (q,  $J = 5.0$  Hz, 1H), 4.11-4.01 (m, 1H), 3.50-3.32 (m, 2H), 2.89-2.81 (m, 2H), 2.66-2.57 (m, 2H), 1.44 (d,  $J = 5.0$  Hz, 3H), 1.39-1.37 (m, 6H), 1.20-1.17 (m, 6H).

**$^{13}C\{^1H\}$  NMR** (126 MHz, Acetone- $d_6$ )  $\delta$  172.0, 152.7, 129.4, 128.8, 125.1, 122.1, 116.8, 93.2, 74.6, 60.5, 48.7, 45.9, 42.8, 39.0, 21.1, 21.1, 20.8.

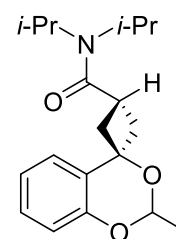

**HRMS (MALDI)**  $m/z$  calcd for  $C_{19}H_{28}NO_3$  ( $[M+H]^+$ ): 318.2064, found 318.2059.

(3's,4s)-*N,N*-diisopropyl-2-methylspiro[benzo[d][1,3]dioxine-4,1'-cyclobutane]-3'-carboxamide (**2k'**)

62% yield, colorless oil. (major product)

**$^1H$  NMR** (400 MHz, Acetone- $d_6$ )  $\delta$  7.36 (dd,  $J = 7.8, 1.8$  Hz, 1H), 7.16-7.12 (m, 1H), 6.99-6.96 (m, 1H), 6.74 (dd,  $J = 8.2, 0.9$  Hz, 1H), 5.18 (q,  $J = 5.1$  Hz, 1H), 4.03-3.96 (m, 1H), 3.51-3.41 (m, 2H), 2.98-2.92 (m, 1H), 2.57 (dd,  $J = 8.9, 2.5$  Hz, 2H), 2.46-2.40 (m, 1H), 1.49 (d,  $J = 5.1$  Hz, 3H), 1.41-1.38 (m, 6H), 1.20-1.17 (m, 6H).

**$^{13}C\{^1H\}$  NMR** (126 MHz, Acetone- $d_6$ )  $\delta$  172.6, 153.1, 128.9, 128.6, 127.1, 122.0, 116.6, 93.8, 77.3, 48.7, 45.9, 42.4, 38.5, 31.4, 21.1, 20.8, 20.8.

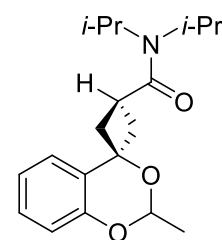

**HRMS (MALDI)**  $m/z$  calcd for  $C_{19}H_{28}NO_3$  ( $[M+H]^+$ ): 318.2064, found 318.2059.

(3r,3'r)-1,1-dimethyl-3'-(phenylsulfonyl)-1H-spiro[benzo[c][1,2]oxasilole-3,1'-cyclobutane] (**4**)

87% yield, white solid

m.p. 154.4 – 155.4 °C.

**<sup>1</sup>H NMR** (400 MHz, Acetone-*d*<sub>6</sub>)  $\delta$  7.99-7.97 (m, 2H), 7.79-7.75 (m, 1H), 7.70-7.66 (m, 2H), 7.61 (d, *J* = 7.8 Hz, 2H), 7.55-7.51 (m, 1H), 7.36-7.33 (m, 1H), 4.30-4.21 (m, 1H), 3.03-2.97 (m, 2H), 2.47-2.41 (m, 2H), 0.31 (s, 6H).

**<sup>13</sup>C NMR** (101 MHz, Acetone-*d*<sub>6</sub>)  $\delta$  154.8, 139.5, 136.2, 134.6, 131.3, 131.3, 130.3, 129.0, 128.4, 123.8, 82.8, 51.5, 40.5, 0.7.

**HRMS (MALDI)** *m/z* calcd for C<sub>19</sub>H<sub>20</sub>O<sub>3</sub>NaSiS ([M+Na]<sup>+</sup>): 367.0795, found 367.0795.

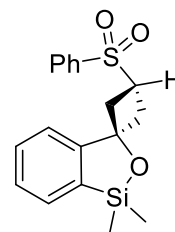

## 5. Computational Studies

All calculations were carried with the Gaussian 16 program package.<sup>2</sup> Geometry optimizations were performed using density functional theory (DFT) with the B3LYP functional, and the basis sets 6-311G(d,p) with the PCM solvation model in CH<sub>2</sub>Cl<sub>2</sub>. Harmonic vibrational analyses were performed at the same level of theory with the geometry optimization to confirm no imaginary vibration was observed for the optimized structure, and only a single imaginary vibration was observed for the transition state.

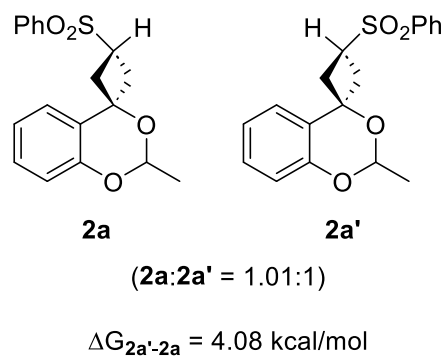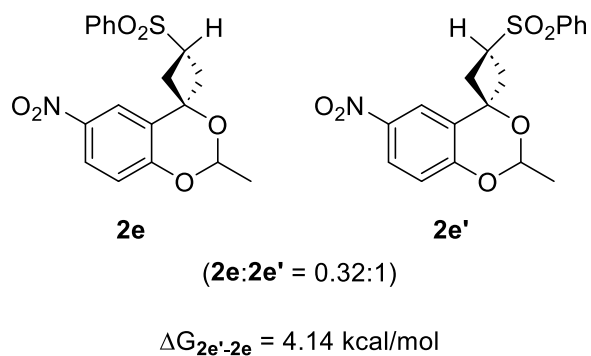

|                                                  |          |          |          |          |          |          |          |
|--------------------------------------------------|----------|----------|----------|----------|----------|----------|----------|
| <b>2a</b>                                        | O        | -2.79235 | -2.34863 | 1.178818 |          |          |          |
| EE + Thermal Free Energy Correction = -1395.7669 | O        | -2.91261 | -2.18991 | -1.35781 |          |          |          |
| Hartree                                          | C        | -2.92369 | 0.052003 | 0.05813  |          |          |          |
| charge = 0, spin = 1                             | C        | -3.06298 | 0.625393 | 1.322103 |          |          |          |
| C                                                | -0.60044 | -1.68515 | -0.15933 | C        | -3.47475 | 1.95245  | 1.416772 |
| C                                                | 0.132397 | -0.84271 | -1.22753 | C        | -3.74281 | 2.68597  | 0.26113  |
| C                                                | 1.246453 | -0.57941 | -0.17539 | C        | -3.60919 | 2.096492 | -0.99588 |
| C                                                | 0.234651 | -1.00056 | 0.945158 | C        | -3.19803 | 0.77029  | -1.10569 |
| C                                                | 1.836777 | 3.202875 | -0.15126 | H        | -0.38503 | -2.75077 | -0.24802 |
| C                                                | 3.231035 | 3.252877 | -0.08802 | H        | 0.458537 | -1.3555  | -2.13025 |
| C                                                | 3.968231 | 2.078395 | -0.01628 | H        | -0.401   | 0.070971 | -1.48797 |
| C                                                | 3.311903 | 0.845491 | -0.01507 | H        | -0.26312 | -0.13078 | 1.375635 |
| C                                                | 1.913555 | 0.77213  | -0.10517 | H        | 0.620748 | -1.63495 | 1.741719 |
| C                                                | 1.192678 | 1.970737 | -0.16146 | H        | 1.257489 | 4.117005 | -0.19967 |
| O                                                | 4.085357 | -0.27969 | 0.073882 | H        | 3.743433 | 4.208007 | -0.0862  |
| C                                                | 3.358253 | -1.45628 | 0.447466 | H        | 5.049792 | 2.090267 | 0.045967 |
| C                                                | 4.266885 | -2.64567 | 0.267821 | H        | 0.110622 | 1.942312 | -0.22235 |
| O                                                | 2.230366 | -1.60586 | -0.37835 | H        | 3.042617 | -1.33    | 1.492377 |
| S                                                | -2.41208 | -1.66967 | -0.0729  | H        | 5.173965 | -2.51393 | 0.859096 |

|   |          |          |          |
|---|----------|----------|----------|
| H | 4.535898 | -2.74433 | -0.78537 |
| H | 3.757481 | -3.55311 | 0.594513 |
| H | -2.8756  | 0.036867 | 2.210869 |
| H | -3.59311 | 2.408992 | 2.392014 |
| H | -4.06604 | 3.717231 | 0.340715 |
| H | -3.83213 | 2.664627 | -1.8909  |
| H | -3.11307 | 0.292678 | -2.07314 |

---

**2a'**

EE + Thermal Free Energy Correction = -1395.7604

Hartree

charge = 0, spin = 1

|   |           |          |          |
|---|-----------|----------|----------|
| C | -0.434599 | -1.45326 | 0.160805 |
| C | 0.205973  | -0.37548 | 1.061055 |
| C | 1.074538  | 0.08455  | -0.16804 |
| C | 0.162369  | -0.77678 | -1.09267 |
| C | 4.318352  | -1.95662 | -0.04314 |
| C | 5.271933  | -0.95104 | -0.2138  |
| C | 4.872083  | 0.372862 | -0.333   |
| C | 3.51381   | 0.697398 | -0.28969 |
| C | 2.538429  | -0.29892 | -0.14134 |
| C | 2.968511  | -1.62518 | -0.01096 |
| O | 3.184999  | 2.019808 | -0.41308 |
| C | 1.860539  | 2.354523 | 0.022622 |
| C | 1.807839  | 2.485453 | 1.539511 |
| O | 0.921306  | 1.458634 | -0.52687 |
| S | -2.229344 | -1.73299 | 0.247879 |
| O | -2.583839 | -2.62167 | -0.87323 |
| O | -2.534101 | -2.15467 | 1.626896 |
| C | -3.029201 | -0.14496 | -0.03248 |
| C | -3.333492 | 0.664676 | 1.061873 |
| C | -3.968708 | 1.883996 | 0.83988  |
| C | -4.291708 | 2.278584 | -0.45813 |
| C | -3.990316 | 1.454318 | -1.54193 |
| C | -3.356023 | 0.231953 | -1.33517 |
| H | -0.051841 | -2.45908 | 0.341173 |
| H | 0.730397  | -0.73566 | 1.944574 |

|   |           |          |          |
|---|-----------|----------|----------|
| H | -0.488994 | 0.416918 | 1.338481 |
| H | 0.653136  | -1.42796 | -1.8132  |
| H | -0.542142 | -0.12145 | -1.60504 |
| H | 4.623774  | -2.9911  | 0.056934 |
| H | 6.326799  | -1.19792 | -0.24646 |
| H | 5.591033  | 1.174025 | -0.45582 |
| H | 2.239418  | -2.41881 | 0.108256 |
| H | 1.646582  | 3.310596 | -0.45227 |
| H | 2.504956  | 3.264118 | 1.854085 |
| H | 2.082855  | 1.556611 | 2.042096 |
| H | 0.801597  | 2.772537 | 1.850217 |
| H | -3.099174 | 0.334185 | 2.065463 |
| H | -4.216843 | 2.520277 | 1.680794 |
| H | -4.787658 | 3.227552 | -0.62488 |
| H | -4.254362 | 1.757789 | -2.54776 |
| H | -3.13892  | -0.42813 | -2.16489 |

---

**2e**

EE + Thermal Free Energy Correction = -1600.3304

Hartree

charge = 0, spin = 1

|   |           |          |          |
|---|-----------|----------|----------|
| C | -1.182348 | -1.99944 | -0.20871 |
| C | -0.273074 | -1.30601 | -1.24862 |
| C | 0.862532  | -1.33235 | -0.18915 |
| C | -0.223102 | -1.55449 | 0.917207 |
| C | 2.328353  | 2.184593 | -0.07672 |
| C | 3.696591  | 1.932714 | 0.036423 |
| C | 4.12675   | 0.622325 | 0.110398 |
| C | 3.197712  | -0.42652 | 0.07172  |
| C | 1.819084  | -0.17068 | -0.07229 |
| C | 1.39785   | 1.153016 | -0.13656 |
| O | 3.683243  | -1.68319 | 0.175869 |
| C | 2.690239  | -2.70125 | 0.436834 |
| C | 3.332469  | -4.04244 | 0.197673 |
| O | 1.603586  | -2.53891 | -0.43066 |
| S | -2.946823 | -1.58533 | -0.11778 |
| O | -3.472645 | -2.21549 | 1.105902 |



|   |           |          |          |   |           |          |          |
|---|-----------|----------|----------|---|-----------|----------|----------|
| O | -3.537915 | -1.93119 | -1.42223 | C | 4.729135  | 0.639632 | -0.24022 |
| C | -3.061697 | 0.198943 | 0.085601 | C | 4.018788  | 1.820497 | -0.3242  |
| C | -3.07475  | 0.737483 | 1.372451 | C | 2.617755  | 1.8075   | -0.26784 |
| C | -3.170269 | 2.118797 | 1.521575 | C | 1.907009  | 0.59678  | -0.15134 |
| C | -3.251948 | 2.940207 | 0.397407 | C | 2.634779  | -0.58547 | -0.06076 |
| C | -3.250767 | 2.386804 | -0.88272 | O | 1.994664  | 3.003725 | -0.34347 |
| C | -3.156288 | 1.007143 | -1.04763 | C | 0.597844  | 3.010825 | 0.028852 |
| N | 1.857797  | 3.568025 | -0.14505 | C | 0.46427   | 3.130597 | 1.539568 |
| O | 0.649114  | 3.766821 | -0.24288 | O | -0.067332 | 1.919082 | -0.55123 |
| O | 2.694468  | 4.465617 | -0.10058 | S | -2.370551 | -1.94392 | 0.251856 |
| H | -1.207521 | -3.08266 | -0.33364 | O | -2.492951 | -2.89446 | -0.86696 |
| H | -0.059845 | -1.84899 | -2.1671  | O | -2.560509 | -2.4212  | 1.632556 |
| H | -0.59108  | -0.29016 | -1.48141 | C | -3.533652 | -0.60082 | -0.03393 |
| H | 0.00603   | -2.2832  | 1.693225 | C | -4.023414 | 0.117281 | 1.05714  |
| H | -0.517303 | -0.60988 | 1.376433 | C | -4.937279 | 1.143399 | 0.830509 |
| H | 4.395073  | 2.756165 | 0.073133 | C | -5.350387 | 1.438165 | -0.46852 |
| H | 5.177316  | 0.381393 | 0.209428 | C | -4.860382 | 0.704708 | -1.54871 |
| H | 0.352413  | 1.406298 | -0.24167 | C | -3.946344 | -0.3245  | -1.33752 |
| H | 2.371856  | -2.57046 | 1.478826 | N | 4.76211   | -1.81559 | 0.00018  |
| H | 3.618023  | -4.13025 | -0.85191 | O | 4.121591  | -2.85607 | 0.129773 |
| H | 2.626973  | -4.83615 | 0.446013 | O | 5.988191  | -1.77188 | -0.05048 |
| H | 4.220022  | -4.14676 | 0.822738 | H | -0.080024 | -2.11239 | 0.348801 |
| H | -3.033948 | 0.086611 | 2.23619  | H | 0.250925  | -0.23887 | 1.942656 |
| H | -3.186292 | 2.551093 | 2.514691 | H | -1.207854 | 0.578436 | 1.322399 |
| H | -3.323737 | 4.014398 | 0.519332 | H | 0.343815  | -0.95307 | -1.81925 |
| H | -3.328007 | 3.026868 | -1.75314 | H | -1.128155 | 0.028415 | -1.60582 |
| H | -3.178228 | 0.562414 | -2.03413 | H | 5.808908  | 0.629101 | -0.27403 |

---

**2e'**

EE + Thermal Free Energy Correction = -1600.3238

Hartree

charge = 0, spin = 1

|   |           |          |          |   |           |          |          |
|---|-----------|----------|----------|---|-----------|----------|----------|
| C | -0.698339 | -1.23283 | 0.162167 | H | 2.145825  | -1.54561 | 0.029258 |
| C | -0.340898 | -0.02486 | 1.054361 | H | 0.190608  | 3.888788 | -0.46824 |
| C | 0.39365   | 0.620154 | -0.17768 | H | 0.947693  | 4.052203 | 1.867525 |
| C | -0.285187 | -0.43817 | -1.09589 | H | 0.930951  | 2.29435  | 2.062935 |
| C | 4.02443   | -0.5566  | -0.09891 | H | -0.591784 | 3.175603 | 1.811158 |
|   |           |          |          | H | -3.713412 | -0.13967 | 2.061742 |
|   |           |          |          | H | -5.331212 | 1.705449 | 1.668623 |
|   |           |          |          | H | -6.063509 | 2.23614  | -0.63878 |
|   |           |          |          | H | -5.194126 | 0.927132 | -2.55499 |

H -3.577684 -0.91845 -2.1637

## 6. References

1. M. Takatsuki, H. Aoyama, K. Murai, M. Arisawa and M. Sako, *Chem. Commun.*, **2023**, 59, 7467.
2. Gaussian 16, Revision C.02, M. J. Frisch, G. W. Trucks, H. B. Schlegel, G. E. Scuseria, M. A. Robb, J. R. Cheeseman, G. Scalmani, V. Barone, G. A. Petersson, H. Nakatsuji, X. Li, M. Caricato, A. V. Marenich, J. Bloino, B. G. Janesko, R. Gomperts, B. Mennucci, H. P. Hratchian, J. V. Ortiz, A. F. Izmaylov, J. L. Sonnenberg, D. Williams-Young, F. Ding, F. Lipparini, F. Egidi, J. Goings, B. Peng, A. Petrone, T. Henderson, D. Ranasinghe, V. G. Zakrzewski, J. Gao, N. Rega, G. Zheng, W. Liang, M. Hada, M. Ehara, K. Toyota, R. Fukuda, J. Hasegawa, M. Ishida, T. Nakajima, Y. Honda, O. Kitao, H. Nakai, T. Vreven, K. Throssell, J. A. Montgomery, Jr., J. E. Peralta, F. Ogliaro, M. J. Bearpark, J. J. Heyd, E. N. Brothers, K. N. Kudin, V. N. Staroverov, T. A. Keith, R. Kobayashi, J. Normand, K. Raghavachari, A. P. Rendell, J. C. Burant, S. S. Iyengar, J. Tomasi, M. Cossi, J. M. Millam, M. Klene, C. Adamo, R. Cammi, J. W. Ochterski, R. L. Martin, K. Morokuma, O. Farkas, J. B. Foresman, and D. J. Fox, Gaussian, Inc., Wallingford CT, 2019.



---

The following ALERTS were generated. Each ALERT has the format

**test-name\_ALERT\_alert-type\_alert-level.**

Click on the hyperlinks for more details of the test.

---

● **Alert level C**

|                   |                                                  |             |
|-------------------|--------------------------------------------------|-------------|
| PLAT230_ALERT_2_C | Hirshfeld Test Diff for S1 --03 .                | 6.2 s.u.    |
| PLAT906_ALERT_3_C | Large K Value in the Analysis of Variance .....  | 2.596 Check |
| PLAT911_ALERT_3_C | Missing FCF Refl Between Thmin & STh/L= 0.600    | 41 Report   |
| PLAT934_ALERT_3_C | Number of (Iobs-Icalc)/Sigma(W) > 10 Outliers .. | 1 Check     |

---

● **Alert level G**

CHEMS02\_ALERT\_1\_G Please check that you have entered the correct  
\_publ\_requested\_category classification of your compound;  
FI or CI or EI for inorganic; FM or CM or EM for metal-organic;  
FO or CO or EO for organic.  
From the CIF: \_publ\_requested\_category CHOOSE FI FM FO CI CM CO or A  
From the CIF: \_chemical\_formula\_sum :C18 H20 O3 S1 Si1

|                   |                                                  |             |
|-------------------|--------------------------------------------------|-------------|
| PLAT882_ALERT_1_G | No Datum for _diffrn_reflms_av_unetI/netI .....  | Please Do ! |
| PLAT912_ALERT_4_G | Missing # of FCF Reflections Above STh/L= 0.600  | 9 Note      |
| PLAT941_ALERT_3_G | Average HKL Measurement Multiplicity .....       | 3.7 Low     |
| PLAT978_ALERT_2_G | Number C-C Bonds with Positive Residual Density. | 2 Info      |

---

- 0 **ALERT level A** = Most likely a serious problem - resolve or explain
- 0 **ALERT level B** = A potentially serious problem, consider carefully
- 4 **ALERT level C** = Check. Ensure it is not caused by an omission or oversight
- 5 **ALERT level G** = General information/check it is not something unexpected

- 2 ALERT type 1 CIF construction/syntax error, inconsistent or missing data
  - 2 ALERT type 2 Indicator that the structure model may be wrong or deficient
  - 4 ALERT type 3 Indicator that the structure quality may be low
  - 1 ALERT type 4 Improvement, methodology, query or suggestion
  - 0 ALERT type 5 Informative message, check
-

# 7. NMR Spectra

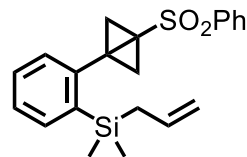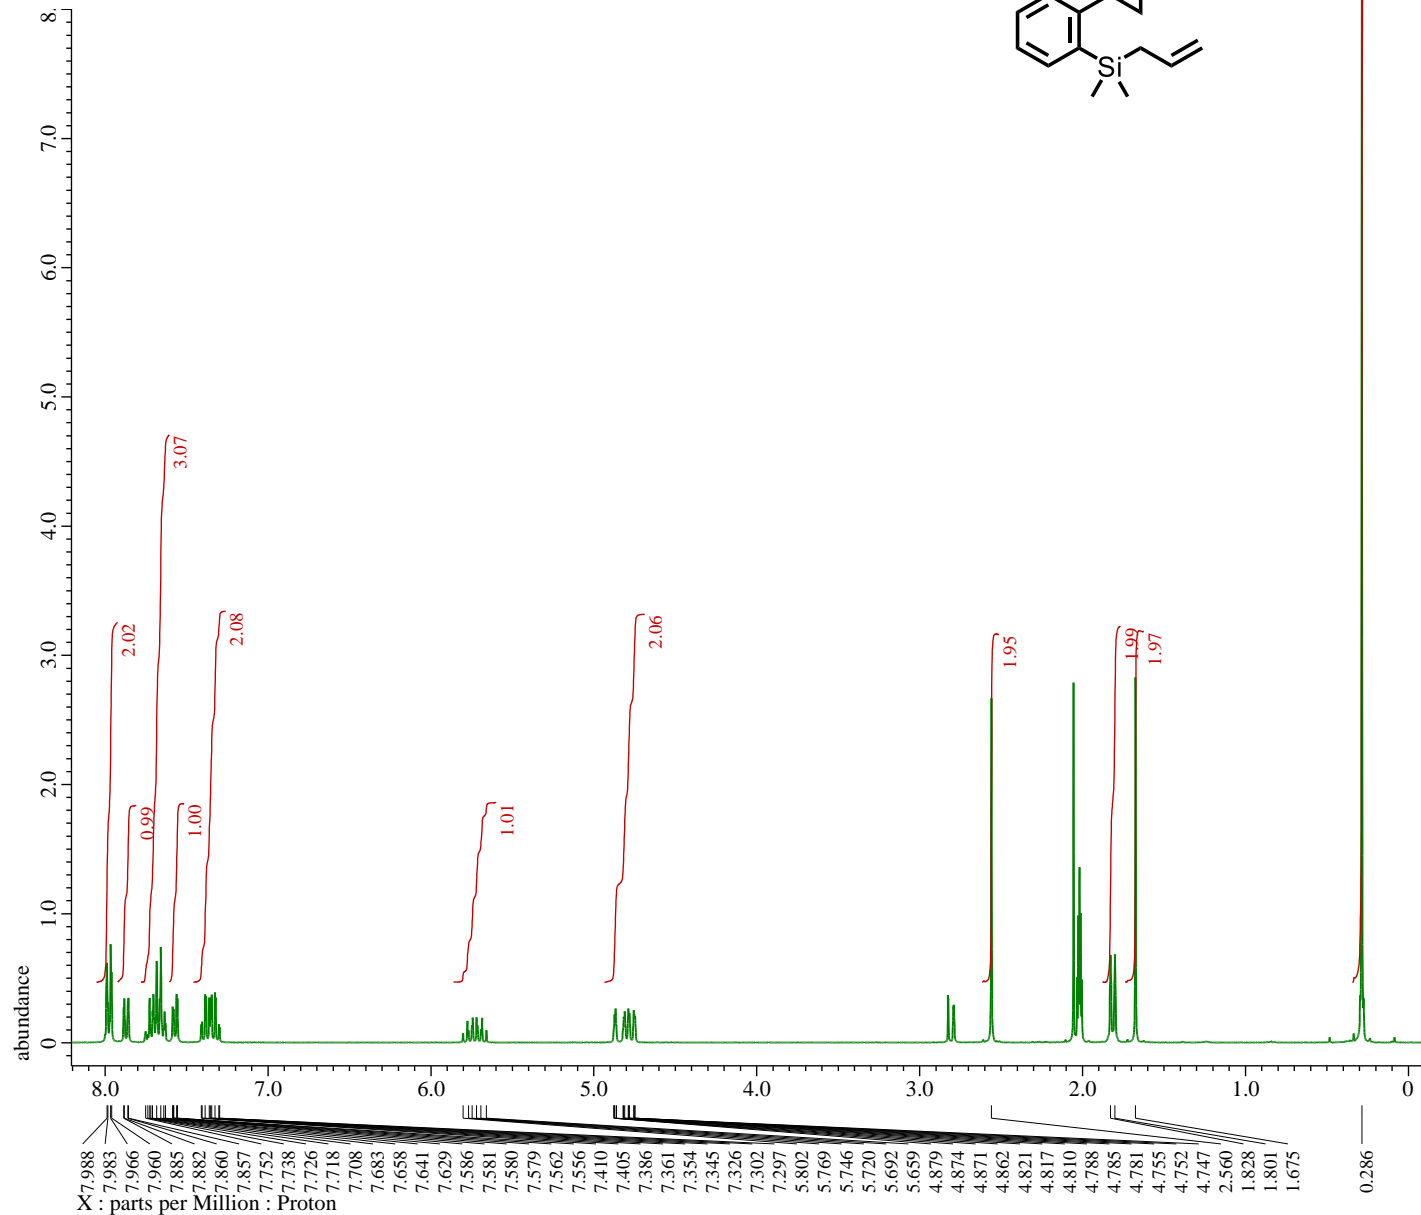

```

---- PROCESSING PARAMETERS ----
dc_balance( 0, FALSE )
sexp( 0.2[Hz], 0.0[s] )
trapezoid( 0[%], 0[%], 80[%], 100[%] )
zerofill( 1, TRUE )
fft( 1, TRUE, TRUE )
machinephase
ppm

Filename           = 36 silicon propenyl Aceto
Author             = delta
Experiment         = proton.jxp
Sample_Id          = silicon propenyl recrysta
Solvent            = ACETONE-D6
Actual_Start_Time  = 29-JAN-2023 12:51:10
Revision_Time      = 15-DEC-2023 17:29:05

Comment           = single_pulse
Data_Format       = 1D COMPLEX
Dim_Size          = 13107
X_Domain          = Proton
Dim_Title         = Proton
Dim_Units         = [ppm]
Dimensions        = X
Site              = ECS 300
Spectrometer      = DELTA2_NMR

Field_Strength    = 7.0586013[T] (300[MHz])
X_Acq_Duration    = 2.90717696[s]
X_Domain          = 1H
X_Freq            = 300.52965592[MHz]
X_Offset          = 5[ppm]
X_Points          = 16384
X_Prescans        = 1
X_Resolution      = 0.34397631[Hz]
X_Sweep           = 5.63570784[kHz]
X_Sweep_Clippped = 4.50856628[kHz]
Irr_Domain        = Proton
Irr_Freq          = 300.52965592[MHz]
Irr_Offset        = 5[ppm]
Tri_Domain        = Proton
Tri_Freq          = 300.52965592[MHz]
Tri_Offset        = 5[ppm]
Clipped           = FALSE
Scans             = 8
Total_Scans       = 8

Relaxation_Delay  = 5[s]
Recvr_Gain        = 40
Temp_Get          = 18.7[dC]
X_90_Width        = 11[us]
X_Acq_Time        = 2.90717696[s]
X_Angle           = 45[deg]
X_Atn             = 1[dB]
X_Pulse           = 5.5[us]
Irr_Mode          = Off
Tri_Mode          = Off
Dante_Presat     = FALSE
Initial_Wait      = 1[s]
Repetition_Time   = 7.90717696[s]
    
```

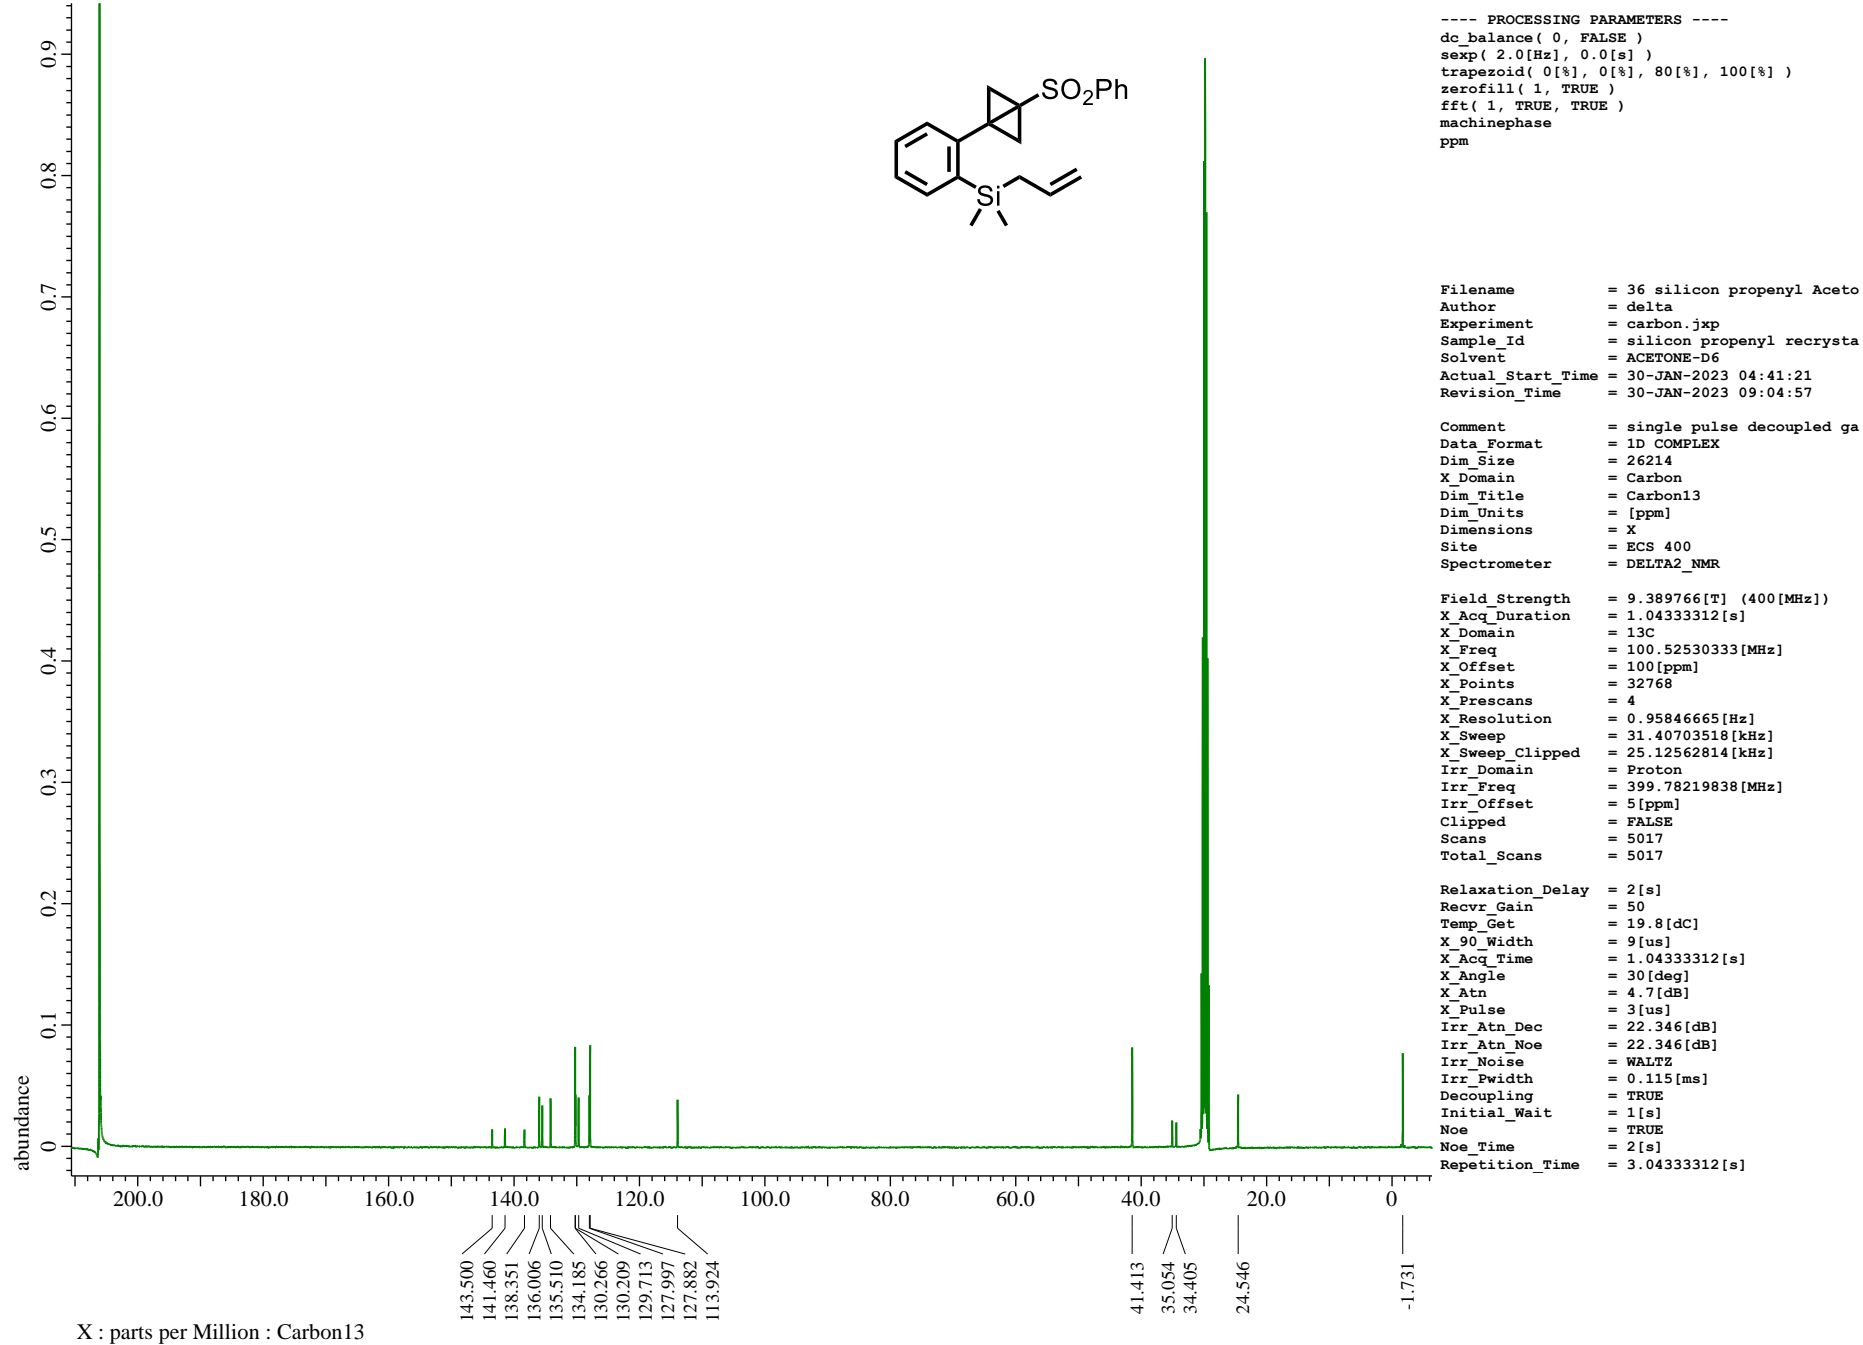

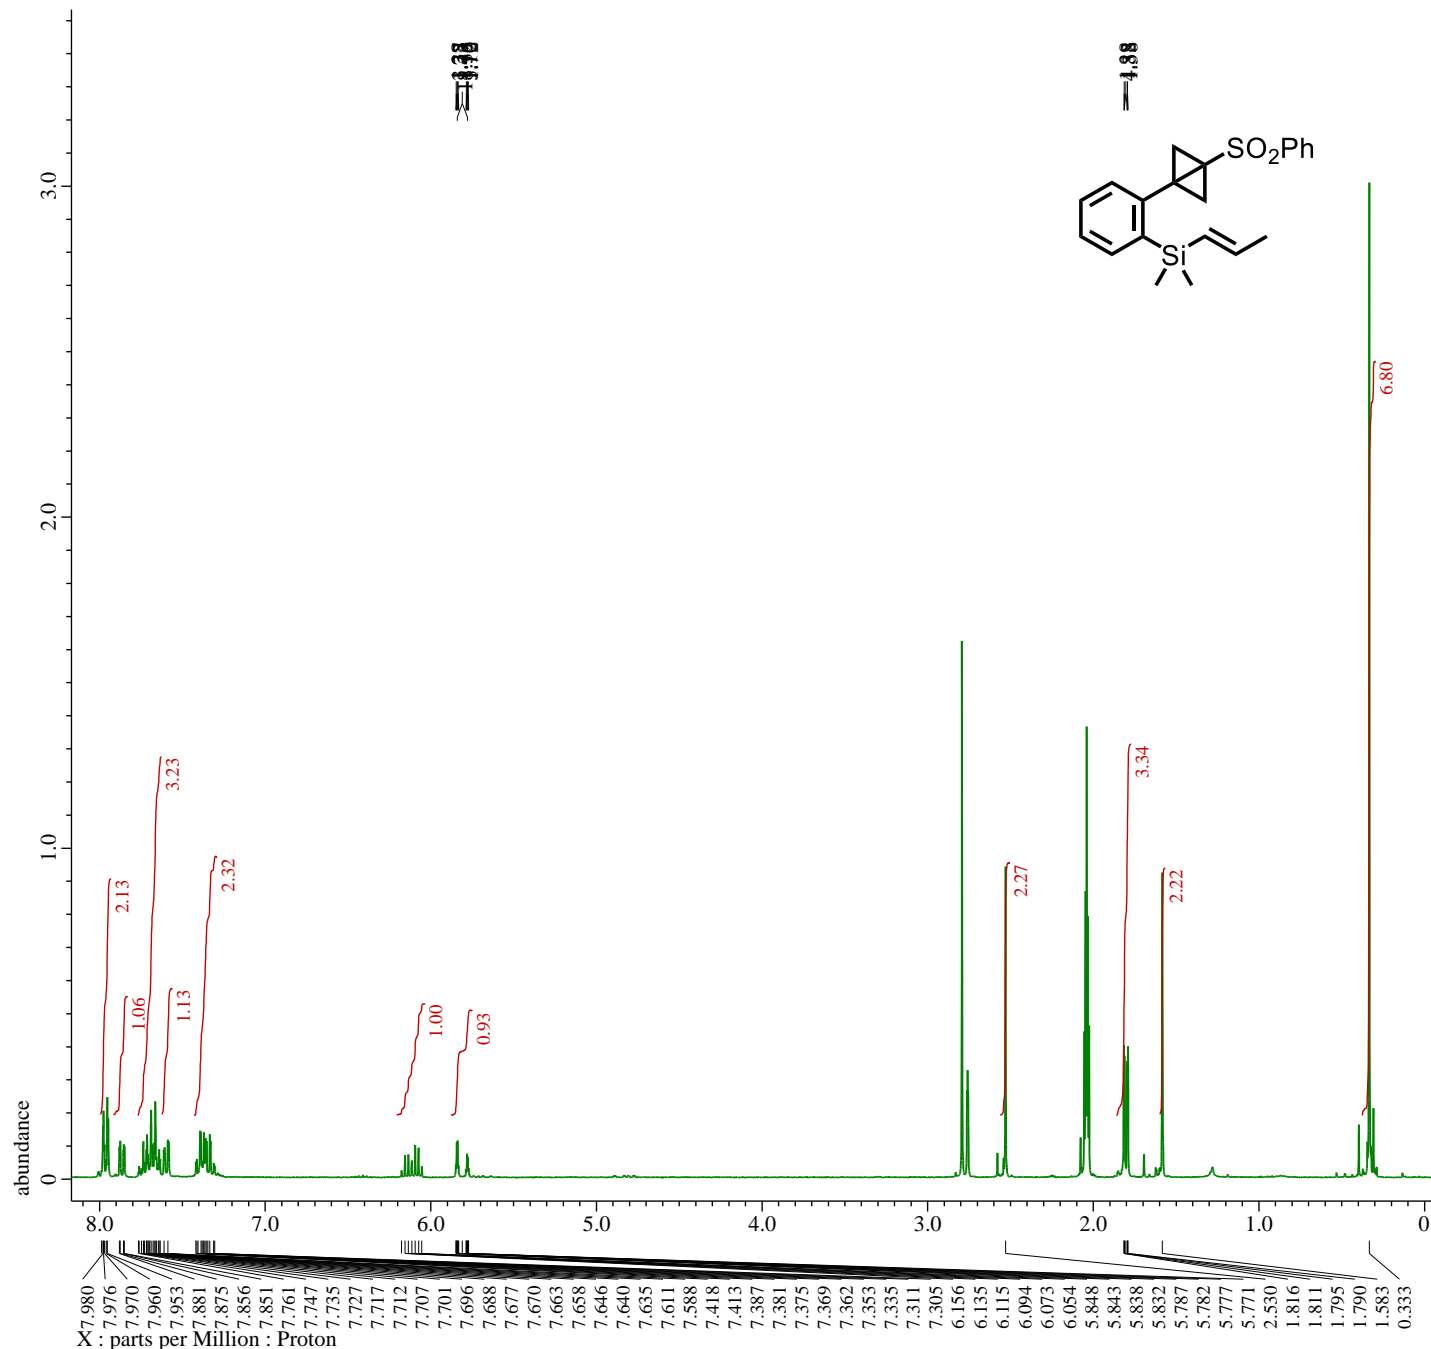

```

---- PROCESSING PARAMETERS ----
dc_balance( 0, FALSE )
sexp( 0.2[Hz], 0.0[s] )
trapezoid( 0[%], 0[%], 80[%], 100[%] )
zerofill( 1, TRUE )
fft( 1, TRUE, TRUE )
machinephase
ppm

```

```

Filename      = 211196 column 4-5 Acetone
Author       = delta
Experiment   = proton.jxp
Sample_Id    = 211196 column 4-5 Acetone
Solvent      = ACETONE-D6
Actual_Start_Time = 20-FEB-2024 14:51:10
Revision_Time   = 21-FEB-2024 23:07:00

```

```

Comment      = single_pulse
Data_Format  = 1D COMPLEX
Dim_Size     = 13107
X_Domain    = Proton
Dim_Title   = Proton
Dim_Units   = [ppm]
Dimensions  = X
Site        = ECS 300
Spectrometer = DELTA2_NMR

```

```

Field_Strength = 7.0586013[T] (300[MHz])
X_Acq_Duration = 2.90717696[s]
X_Domain       = 1H
X_Freq         = 300.52965592[MHz]
X_Offset       = 5[ppm]
X_Points       = 16384
X_Prescans     = 1
X_Resolution   = 0.34397631[Hz]
X_Sweep        = 5.63570784[kHz]
X_Sweep_Clippped = 4.50856628[kHz]
Irr_Domain     = Proton
Irr_Freq       = 300.52965592[MHz]
Irr_Offset     = 5[ppm]
Tri_Domain     = Proton
Tri_Freq       = 300.52965592[MHz]
Tri_Offset     = 5[ppm]
Clipped        = FALSE
Scans          = 8
Total_Scans    = 8

```

```

Relaxation_Delay = 0.5[s]
Recvr_Gain       = 44
Temp_Get         = 25.1[dC]
X_90_Width      = 11[us]
X_Acq_Time       = 2.90717696[s]
X_Angle         = 45[deg]
X_Atn           = 1[dB]
X_Pulse         = 5.5[us]
Irr_Mode        = Off
Tri_Mode        = Off
Dante_Presat    = FALSE
Initial_Wait     = 1[s]
Repetition_Time = 3.40717696[s]

```



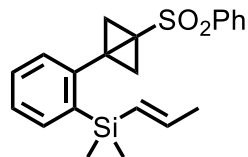

```

---- PROCESSING PARAMETERS ----
dc_balance( 0, FALSE )
sexp( 2.0[Hz], 0.0[s] )
trapezoid( 0[%], 0[%], 80[%], 100[%] )
zerofill( 1, TRUE )
fft( 1, TRUE, TRUE )
machinephase
ppm

```

```

Filename      = 211196 column 4-5 CDC13 2
Author        = delta
Experiment     = carbon.jxp
Sample Id     = 211196 column 4-5 CDC13 2
Solvent       = ACETONE-D6
Actual_Start_Time = 22-FEB-2024 21:56:58
Revision Time = 28-FEB-2024 15:03:23

```

```

Comment       = single pulse decoupled ga
Data Format    = 1D COMPLEX
Dim Size      = 26214
X_Domain      = Carbon
Dim Title     = Carbon13
Dim Units     = [ppm]
Dimensions    = X
Site          = ECS 300
Spectrometer  = DELTA2_NMR

```

```

Field Strength = 7.0586013[T] (300[MHz])
X_Acq_Duration = 1.38412032[s]
X_Domain       = 13C
X_Freq         = 75.56823426[MHz]
X_Offset       = 100 [ppm]
X_Points       = 32768
X_Prescans     = 4
X_Resolution   = 0.72248054 [Hz]
X_Sweep        = 23.67424242 [kHz]
X_Sweep_Clippped = 18.93939394 [kHz]
Irr_Domain     = Proton
Irr_Freq       = 300.52965592 [MHz]
Irr_Offset     = 5 [ppm]
Clipped        = FALSE
Scans          = 2302
Total Scans    = 2302

```

```

Relaxation_Delay = 0.5 [s]
Recvr_Gain       = 50
Temp_Get         = 23 [dC]
X_90_Width       = 11.4 [us]
X_Acq_Time       = 1.38412032 [s]
X_Angle          = 30 [deg]
X_Atn            = 5.4 [dB]
X_Pulse          = 3.8 [us]
Irr_Atn_Dec      = 21.6 [dB]
Irr_Atn_Noec    = 21.6 [dB]
Irr_Noise        = WALTZ
Irr_Pwidth       = 0.118 [ms]
Decoupling       = TRUE
Initial_Wait     = 1 [s]
Noe              = TRUE
Noe_Time         = 0.5 [s]
Repetition Time  = 1.88412032 [s]

```

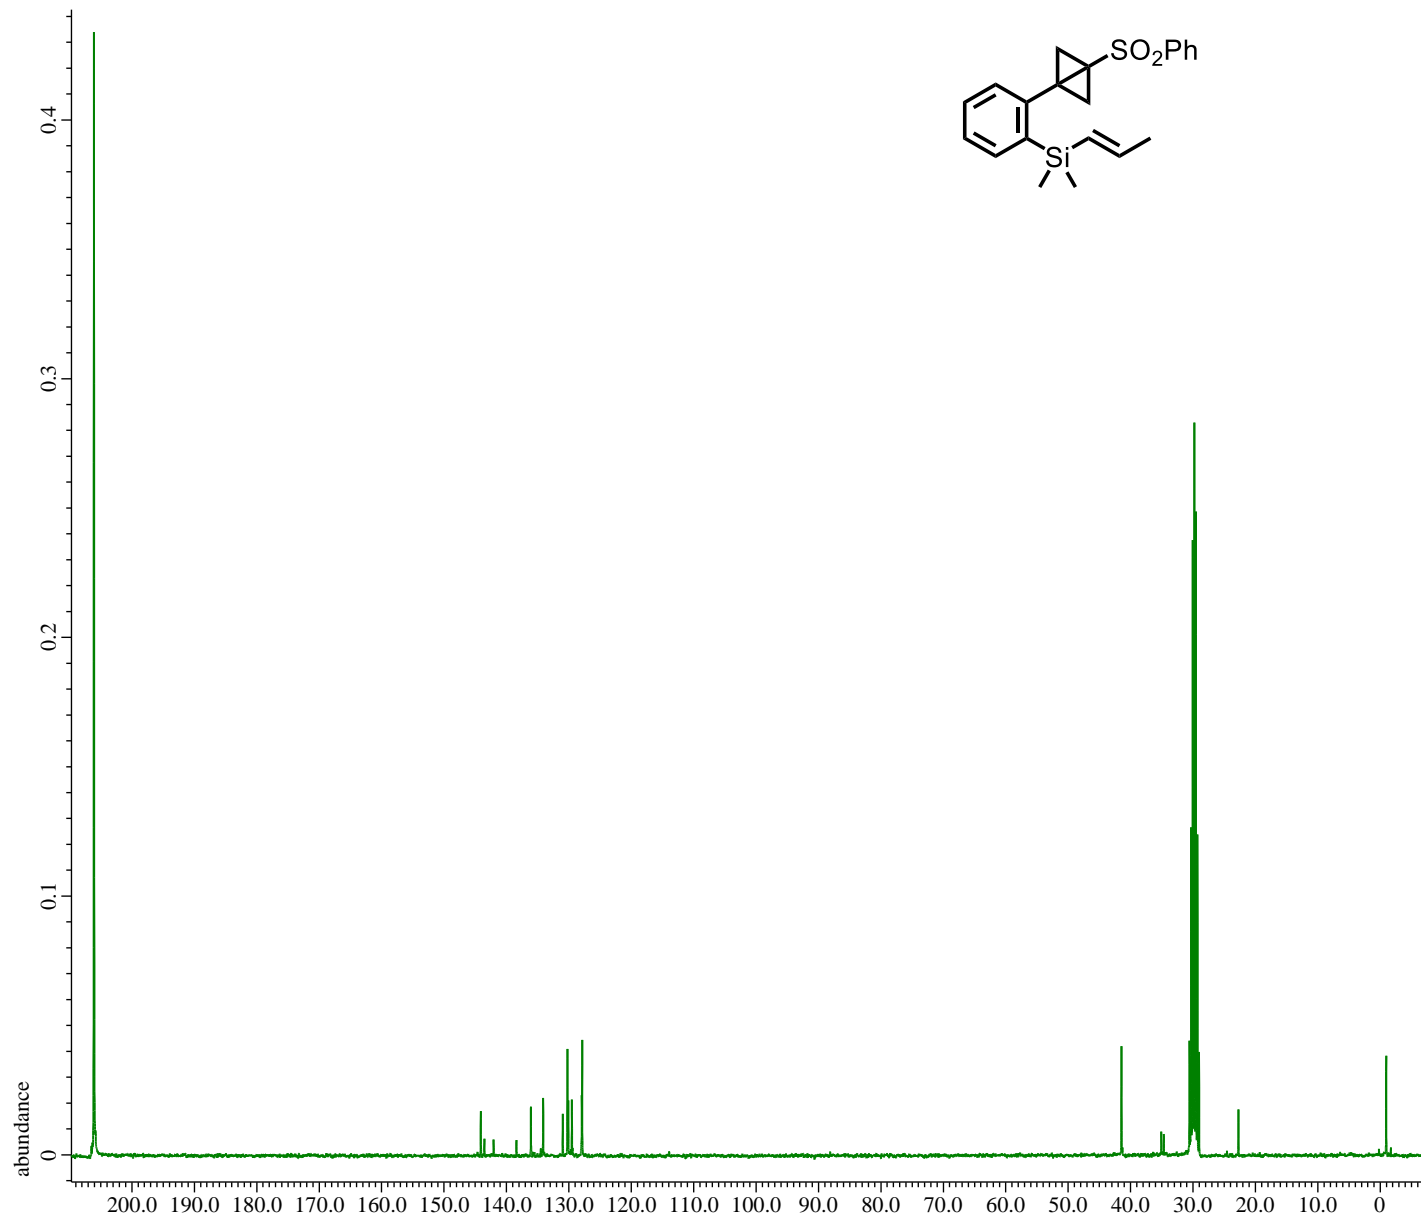

144.107  
143.524  
142.061  
138.399  
136.076  
134.116  
130.980  
130.225  
130.091  
129.518  
127.930  
127.864

41.464  
35.087  
34.685  
22.725  
-0.957

X : parts per Million : Carbon13

<sup>13</sup>C NMR spectrum of **3** (76 MHz, Acetone-d<sub>6</sub>)

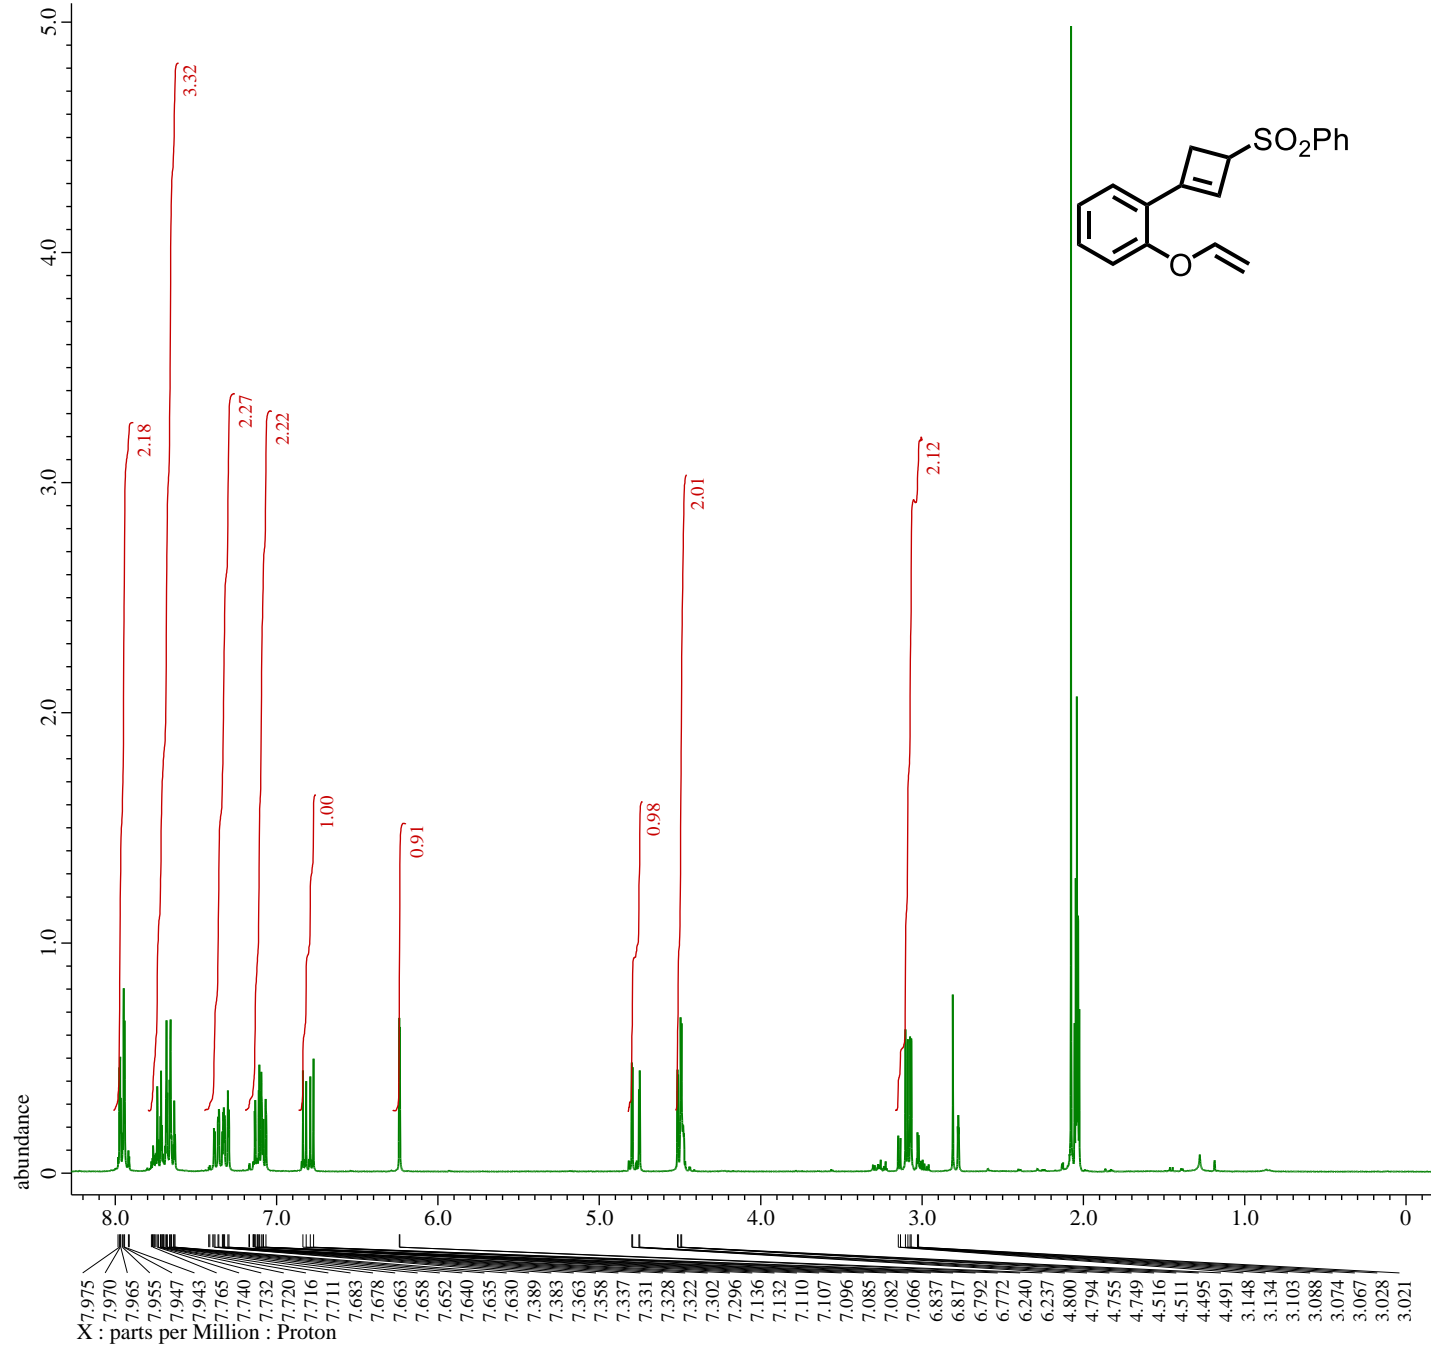

```

---- PROCESSING PARAMETERS ----
dc_balance( 0, FALSE )
sexp( 0.2[Hz], 0.0[s] )
trapezoid( 0[%], 0[%], 80[%], 100[%] )
zerofill( 1, TRUE )
fft( 1, TRUE, TRUE )
machinephase
ppm

Filename           = 211118,20,21 column Aceto
Author             = delta
Experiment         = proton.jxp
Sample_Id         = 211118,20,21 column Aceto
Solvent           = ACETONE-D6
Actual_Start_Time = 30-DEC-2023 20:42:50
Revision_Time     = 12-JAN-2024 22:25:15

Comment           = single_pulse
Data_Format       = 1D COMPLEX
Dim_Size         = 7368
X_Domain         = Proton
Dim_Title        = Proton
Dim_Units        = [ppm]
Dimensions       = X
Site             = ECS 300
Spectrometer     = DELTA2_NMR

Field_Strength    = 7.0586013[T] (300[MHz])
X_Acq_Duration   = 2.90717696[s]
X_Domain         = 1H
X_Freq           = 300.52965592[MHz]
X_Offset         = 5[ppm]
X_Points        = 16384
X_Prescans      = 1
X_Resolution     = 0.34397631[Hz]
X_Sweep         = 5.63570784[kHz]
X_Sweep_Clipped = 4.50856628[kHz]
Irr_Domain       = Proton
Irr_Freq        = 300.52965592[MHz]
Irr_Offset      = 5[ppm]
Tri_Domain       = Proton
Tri_Freq        = 300.52965592[MHz]
Tri_Offset      = 5[ppm]
Clipped         = FALSE
Scans           = 32
Total_Scans     = 32

Relaxation_Delay = 1[s]
Recvr_Gain       = 46
Temp_Get        = 22.6[dC]
X_90_Width     = 11[us]
X_Acq_Time     = 2.90717696[s]
X_Angle        = 45[deg]
X_Atn          = 1[dB]
X_Pulse        = 5.5[us]
Irr_Mode       = Off
Tri_Mode       = Off
Dante_Presat   = FALSE
Initial_Wait   = 1[s]
Repetition_Time = 3.90717696[s]

```

<sup>1</sup>H NMR spectrum of 5a (400 MHz, Acetone-d<sub>6</sub>)

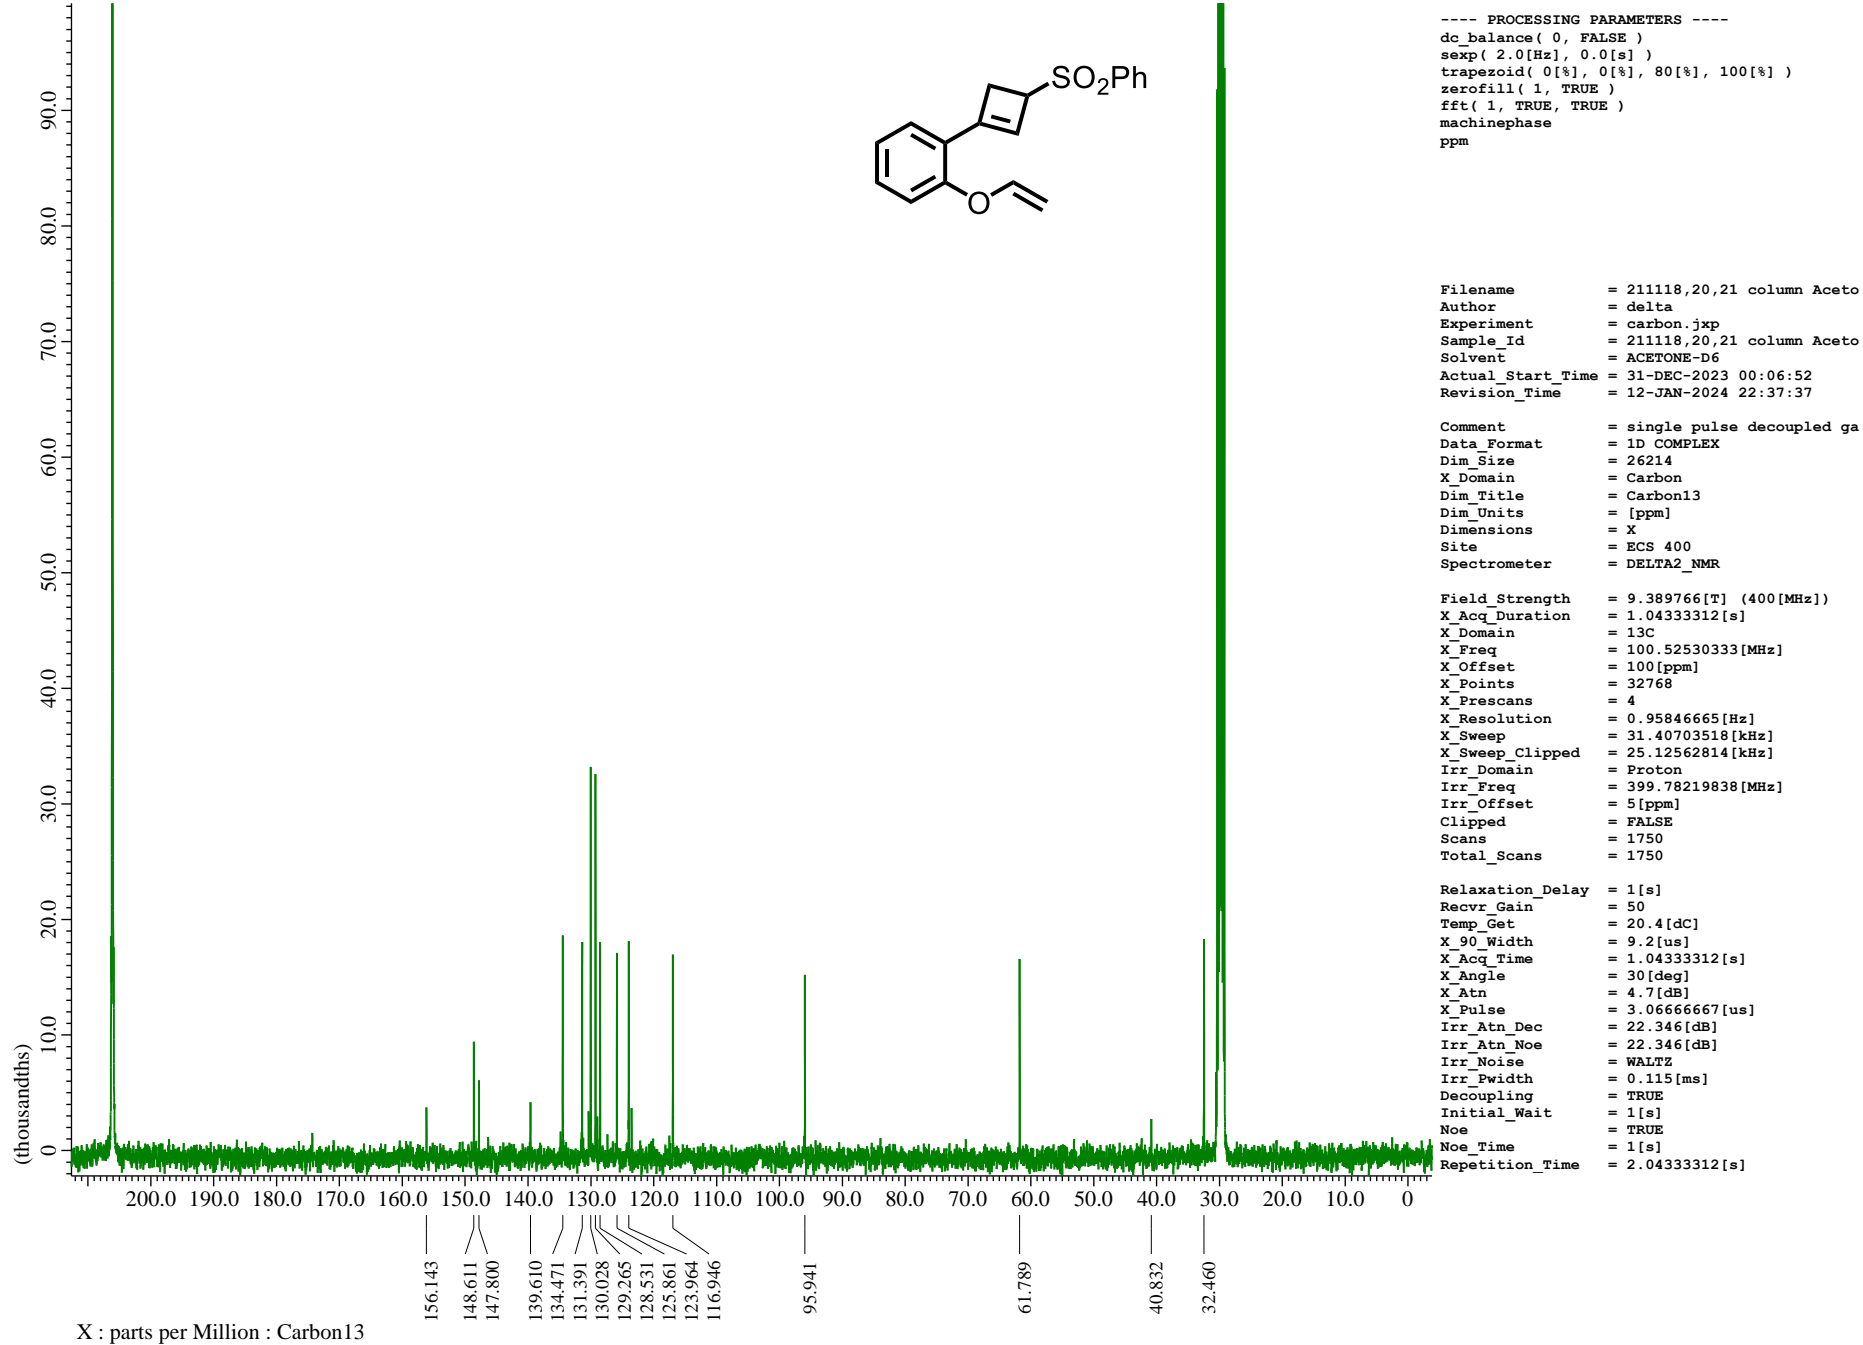

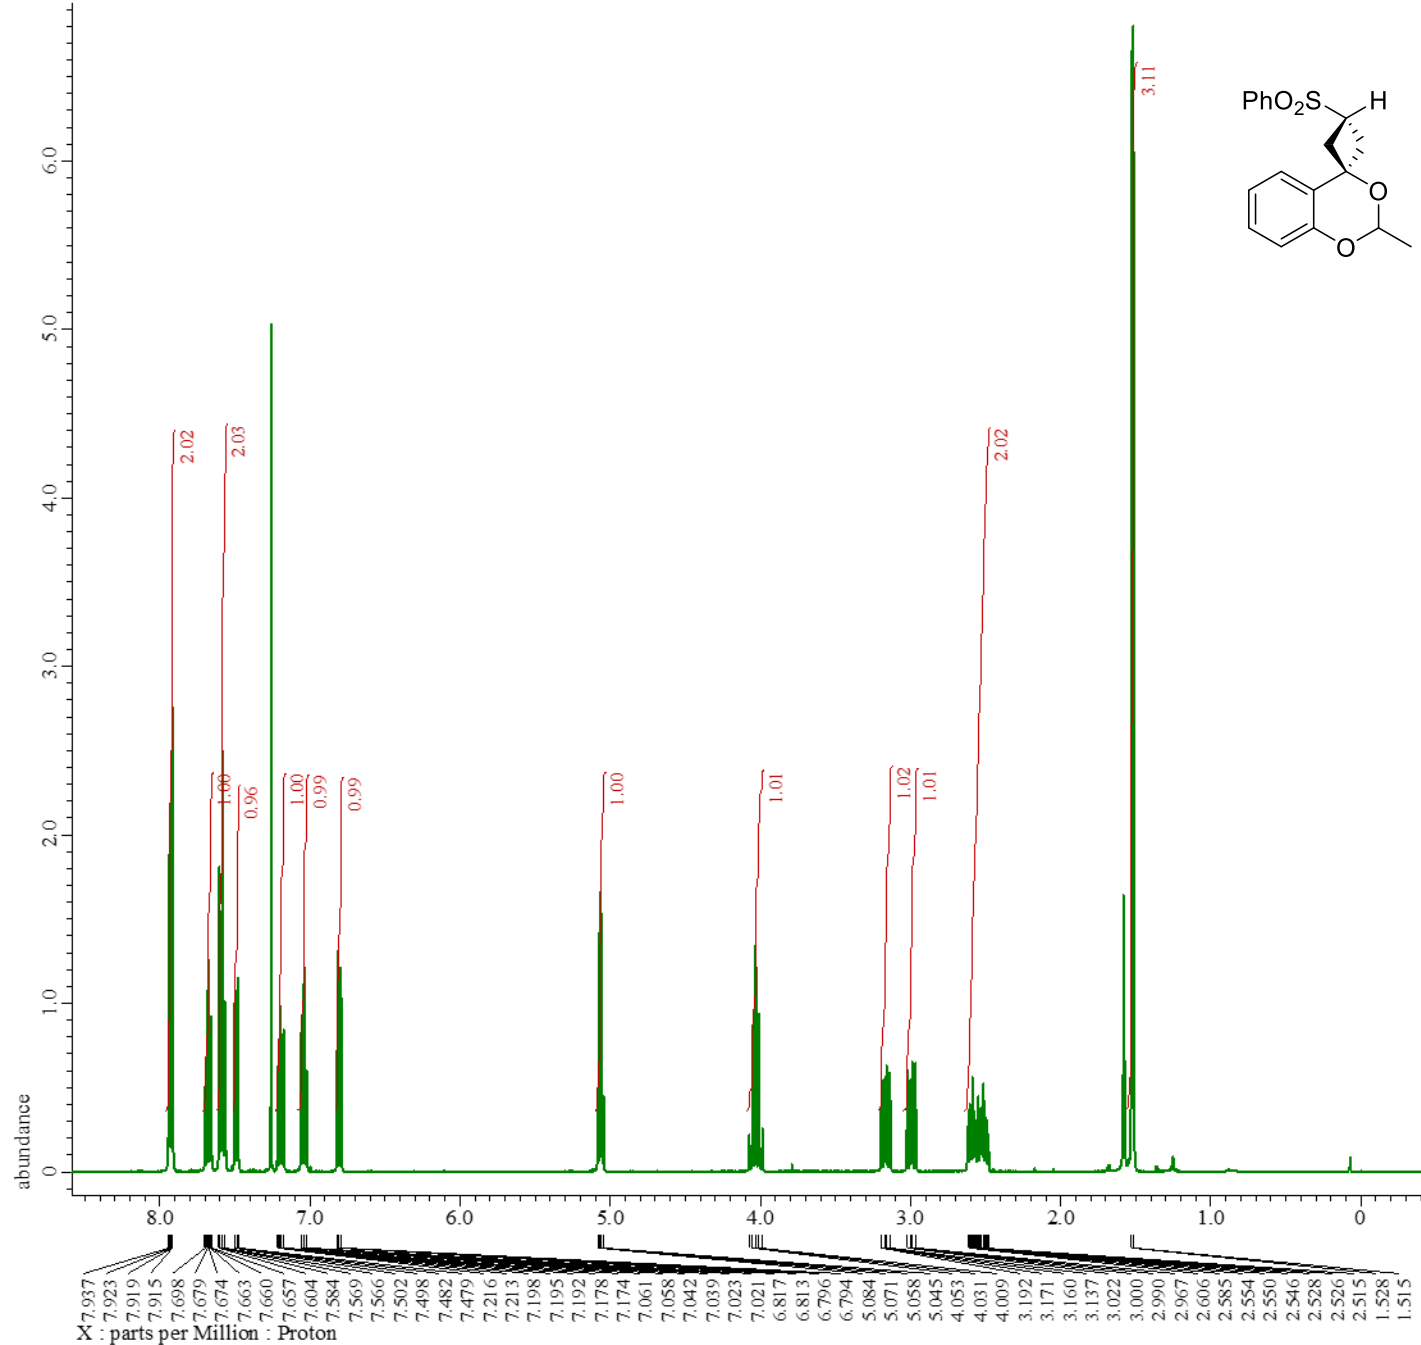

```

---- PROCESSING PARAMETERS ----
dc balance( 0, FALSE )
sexp( 0.2[Hz], 0.0[s] )
trapezoid( 0[8], 0[8], 80[8], 100[8] )
zerofill( 1, TRUE )
fft( 1, TRUE, TRUE )
machinephase
ppm

Filename      = 11 ue CDC13_Proton-1-3.jd
Author       = delta
Experiment   = proton.jxp
Sample Id    = ue CDC13
Solvent      = CHLOROFORM-D
Actual Start Time = 7-NOV-2022 13:41:35
Revision Time = 16-MAR-2023 10:48:11

Comment      = single pulse
Data Format   = 1D COMPLEX
Dim Size     = 13107
X_Domain    = Proton
Dim Title    = Proton
Dim Units    = [ppm]
Dimensions   = X
Site         = ECS 400
Spectrometer = DELTA2_NMR

Field Strength = 9.389766[T] (400[MHz])
X Acq_Duration = 2.18365952[s]
X_Domain       = 1H
X_Freq         = 399.78219838[MHz]
X_Offset       = 5[ppm]
X_Points       = 16384
X_Prescans    = 1
X_Resolution  = 0.45794685[Hz]
X_Sweep       = 7.5030012[kHz]
X_Sweep_Clipped = 6.00240096[kHz]
Irr_Domain    = Proton
Irr_Freq     = 399.78219838[MHz]
Irr_Offset    = 5[ppm]
Tri_Domain    = Proton
Tri_Freq     = 399.78219838[MHz]
Tri_Offset    = 5[ppm]
Clipped      = FALSE
Scans        = 8
Total_Scans  = 8

Relaxation_Delay = 5[s]
Recvr_Gain       = 44
Temp_Get         = 20.1[dc]
X_90_Width      = 12.4[us]
X_Acq_Time      = 2.18365952[s]
X_Angle         = 45[deg]
X_Atn           = 3[dB]
X_Pulse         = 6.2[us]
Irr_Mode        = Off
Tri_Mode        = Off
Dante_Presat    = FALSE
Initial_Wait    = 1[s]
Repetition_Time = 7.18365952[s]

```

<sup>1</sup>H NMR spectrum of **2a** (400 MHz, CDCl<sub>3</sub>)

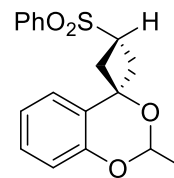

```

---- PROCESSING PARAMETERS ----
dc balance( 0, FALSE )
sexp( 2.0[Hz], 0.0[s] )
trapezoid( 0[8], 0[8], 80[8], 100[8] )
zerofill( 1, TRUE )
fft( 1, TRUE, TRUE )
machinephase
ppm

Filename      = 11 ue CDC13_Carbon-1-2.jd
Author        = delta
Experiment    = carbon.jxp
Sample Id     = ue CDC13
Solvent       = CHLOROFORM-D
Actual Start Time = 31-OCT-2022 09:34:22
Revision Time  = 5-JAN-2023 16:44:24

Comment       = single pulse decoupled ga
Data Format    = 1D COMPLEX
Dim Size      = 26214
X_Domain     = Carbon
Dim Title     = Carbon13
Dim Units     = [ppm]
Dimensions    = X
Site          = ECS 400
Spectrometer  = DELTA2_NMR

Field Strength = 9.389766[T] (400[MHz])
X_Acq_Duration = 1.04333312[s]
X_Domain       = 13C
X_Freq         = 100.52530333[MHz]
X_Offset       = 100[ppm]
X_Points       = 32768
X_Prescans    = 4
X_Resolution   = 0.95846665[Hz]
X_Sweep        = 31.40703518[kHz]
X_Sweep_Clippped = 25.12562814[kHz]
Irr_Domain     = Proton
Irr_Freq       = 399.78219838[MHz]
Irr_Offset     = 5[ppm]
Clipped        = FALSE
Scans          = 512
Total_Scans    = 512

Relaxation_Delay = 2[s]
Recvr Gain       = 50
Temp_Get         = 20.2[dC]
X_90_Width      = 9[us]
X_Acq_Time      = 1.04333312[s]
X_Angle         = 30[deg]
X_Atn           = 4.7[dB]
X_Pulse         = 3[us]
Irr_Atn_Dec     = 22.346[dB]
Irr_Atn_Noise  = 22.346[dB]
Irr_Noise       = WALTZ
Irr_Pwidth      = 0.115[ms]
Decoupling      = TRUE
Initial_Wait    = 1[s]
Noe              = TRUE
Noe Time        = 2[s]
Repetition Time = 3.04333312[s]

```

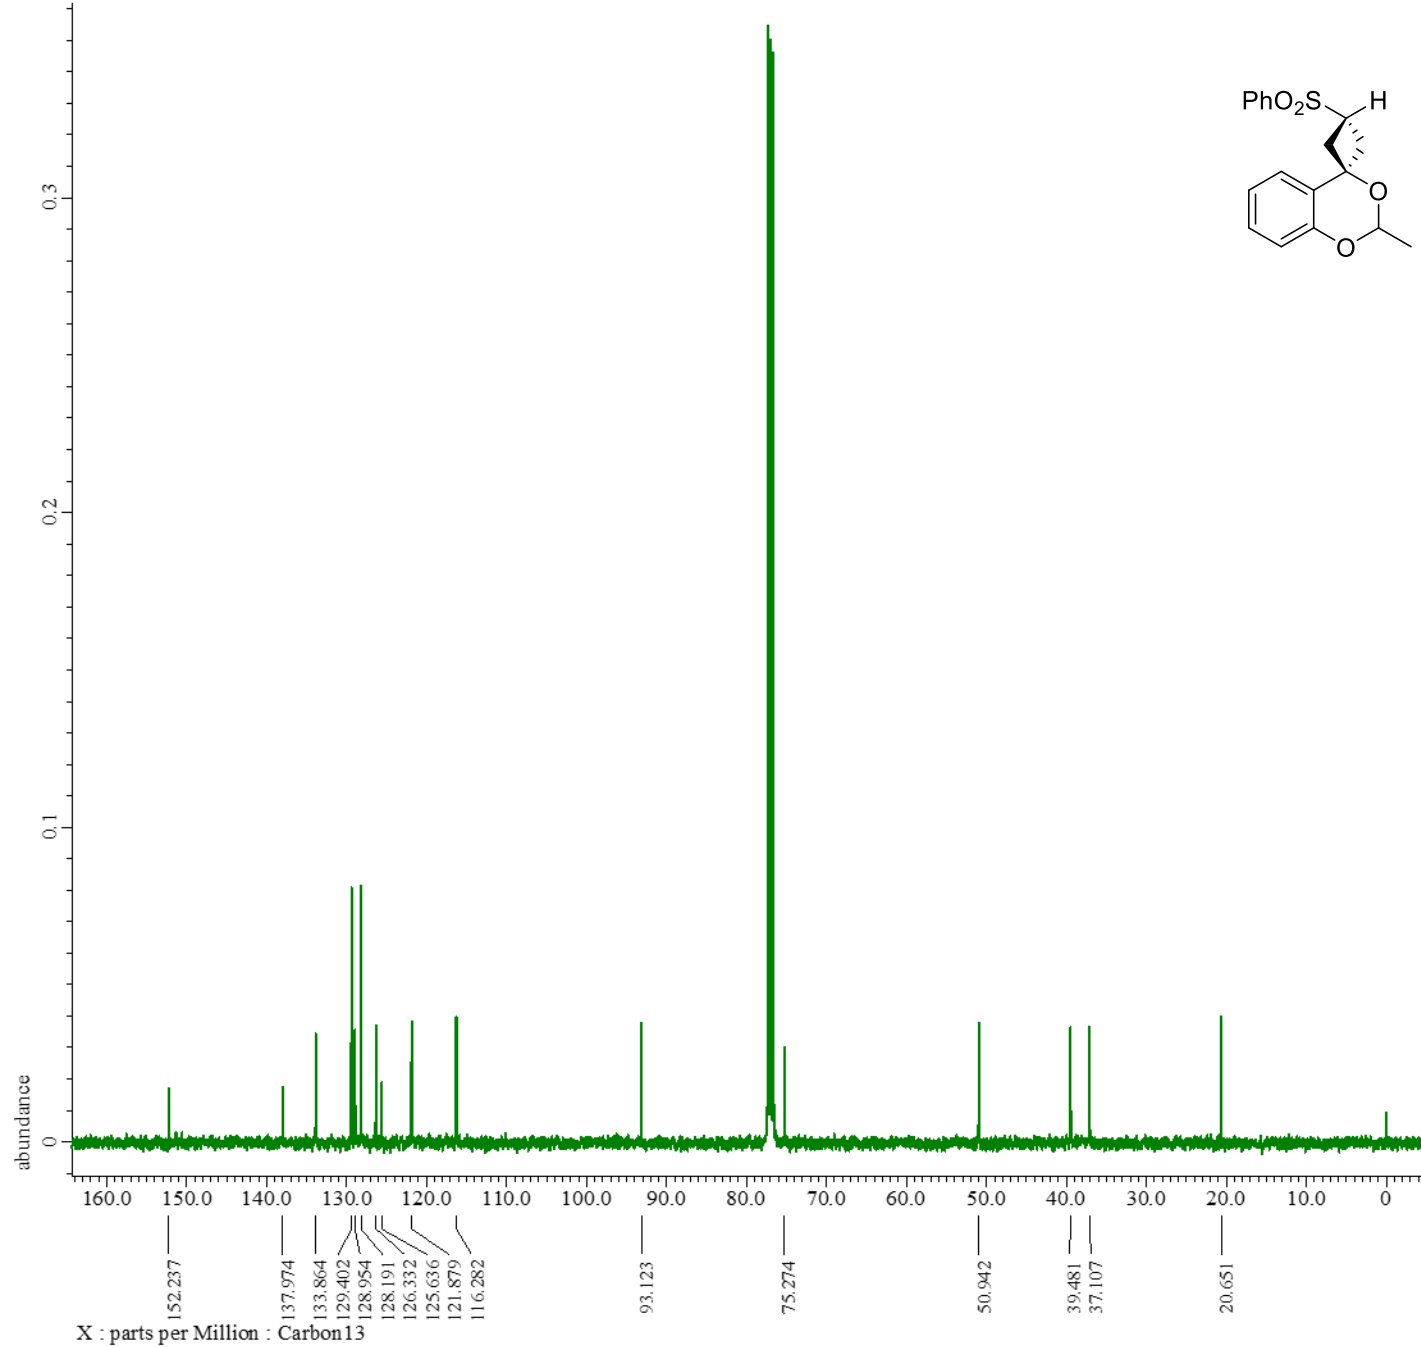

<sup>13</sup>C NMR spectrum of **2a** (101 MHz, CDCl<sub>3</sub>)

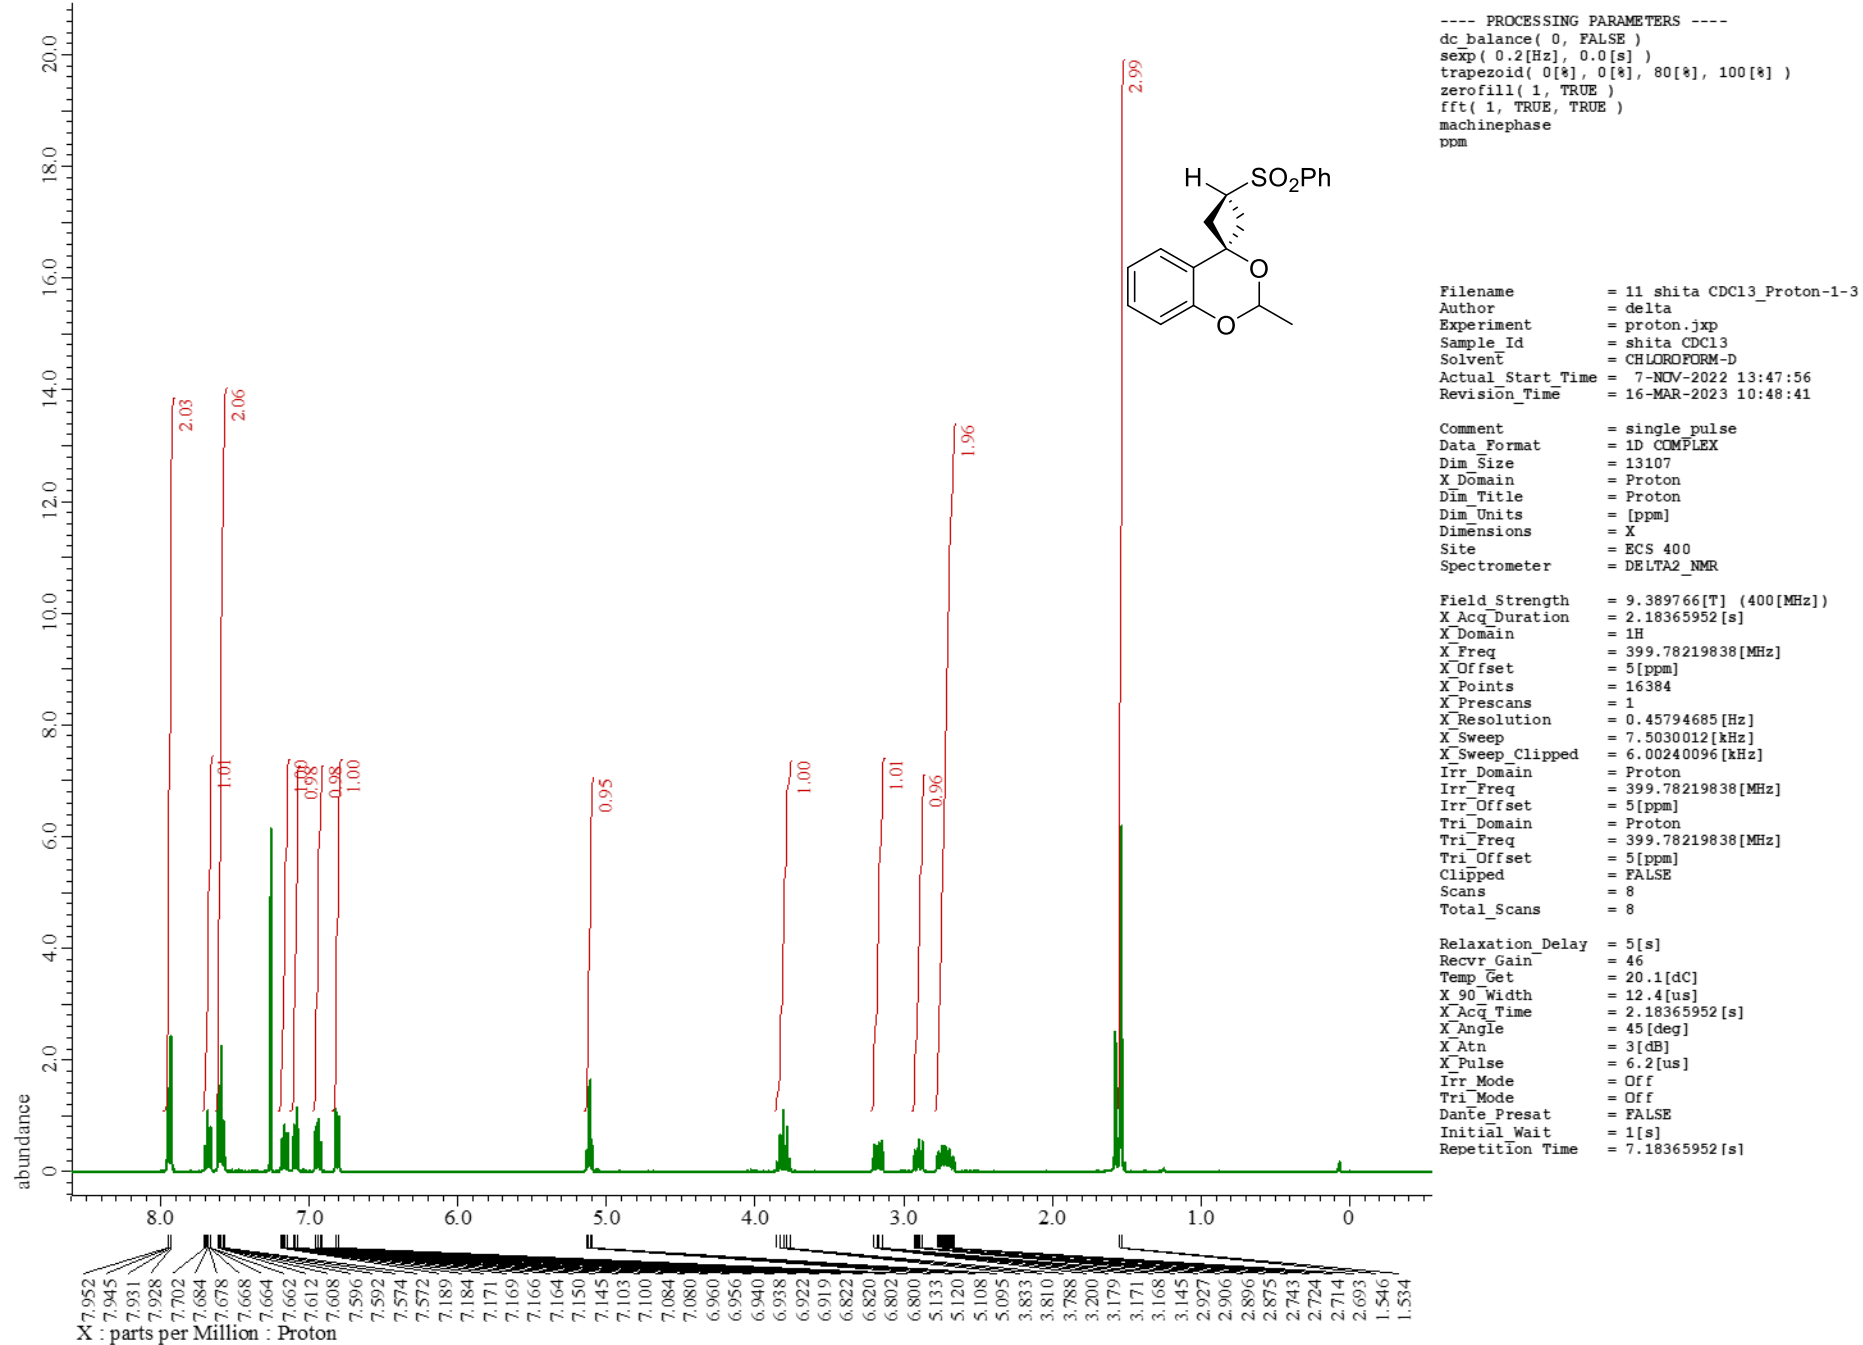

<sup>1</sup>H NMR spectrum of **2a'** (400 MHz, CDCl<sub>3</sub>)

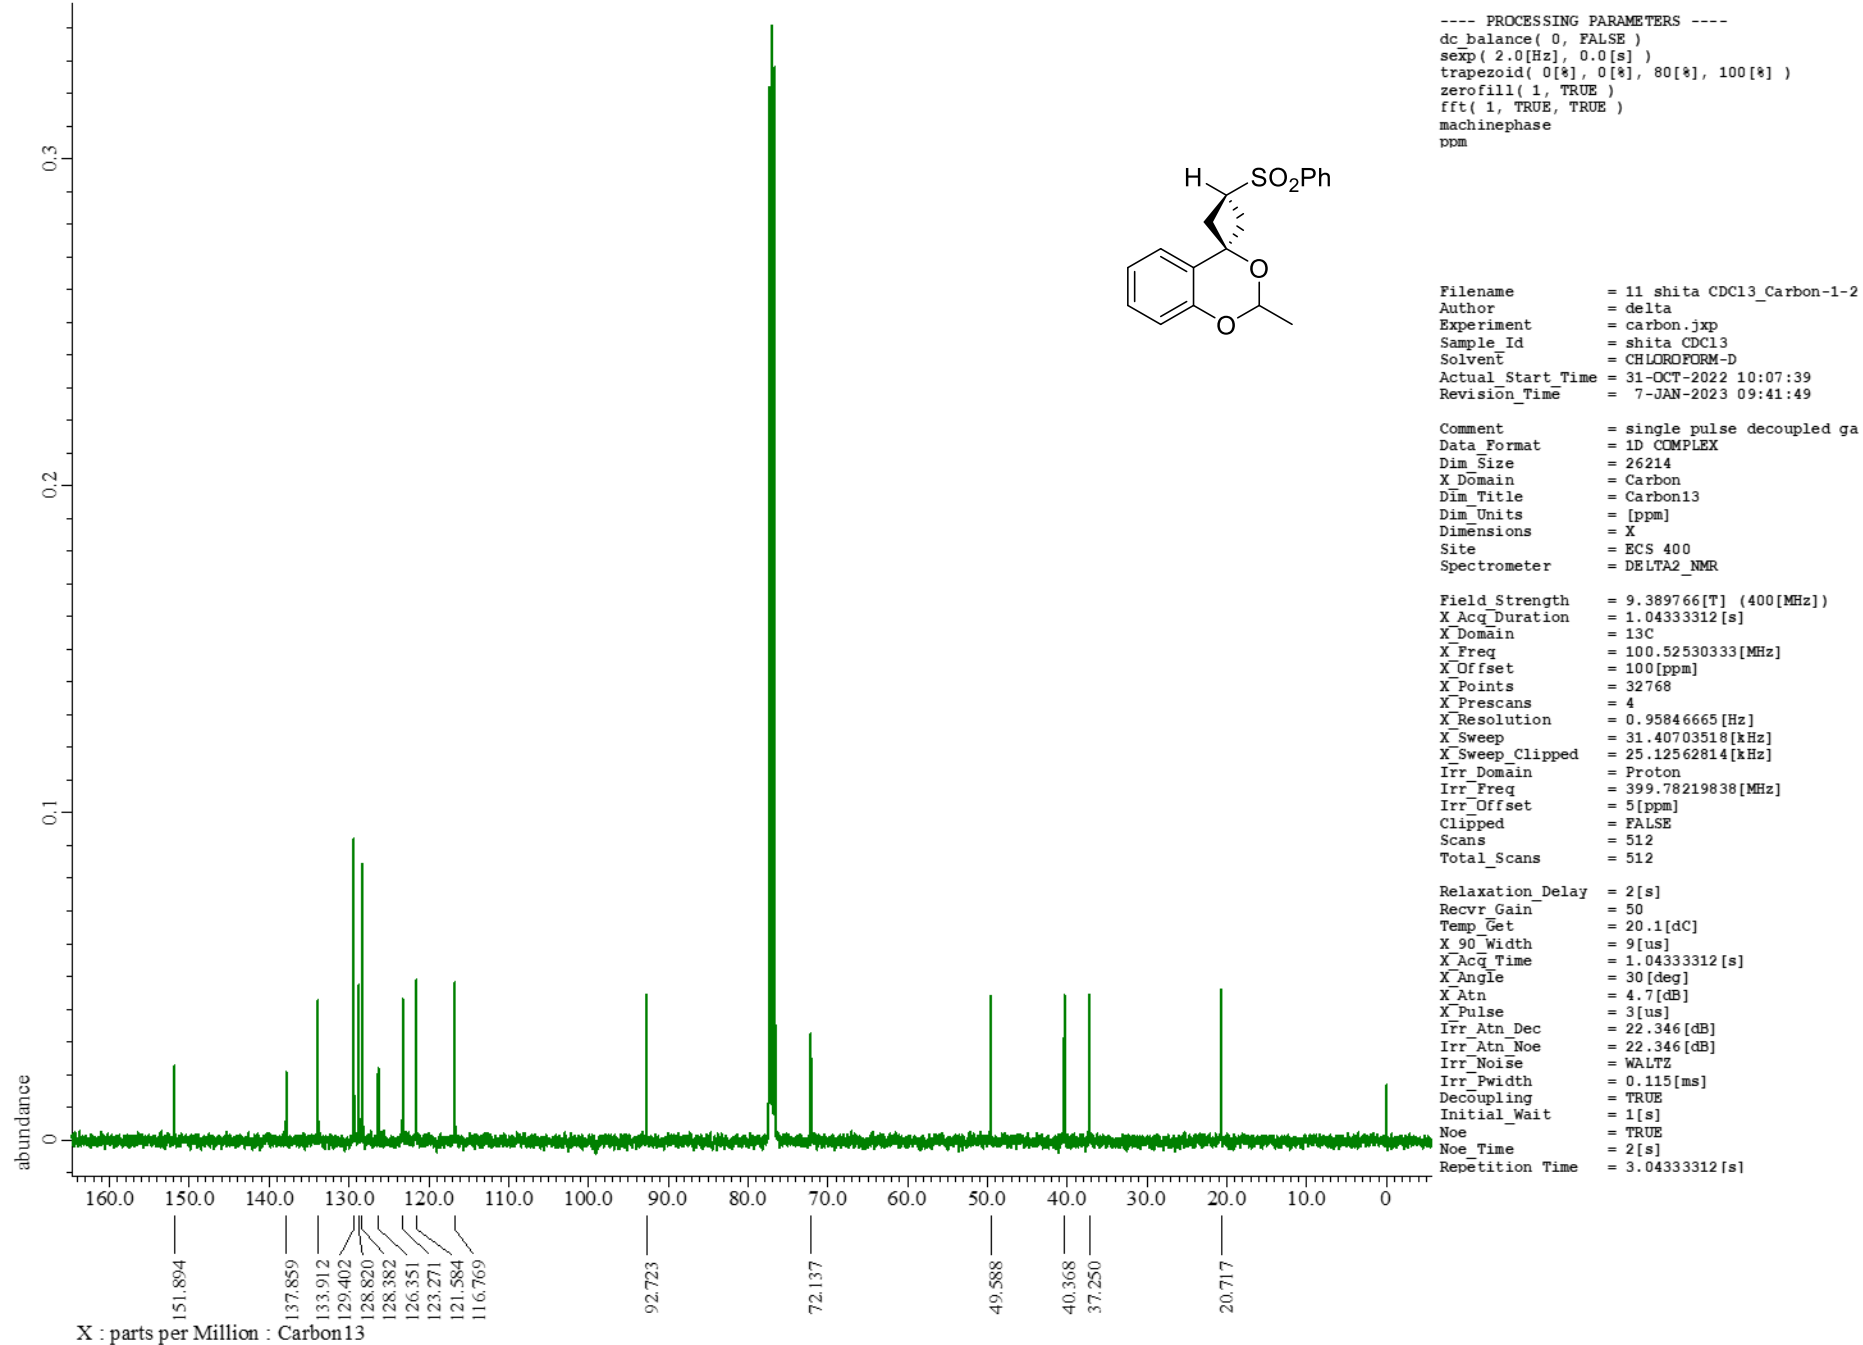

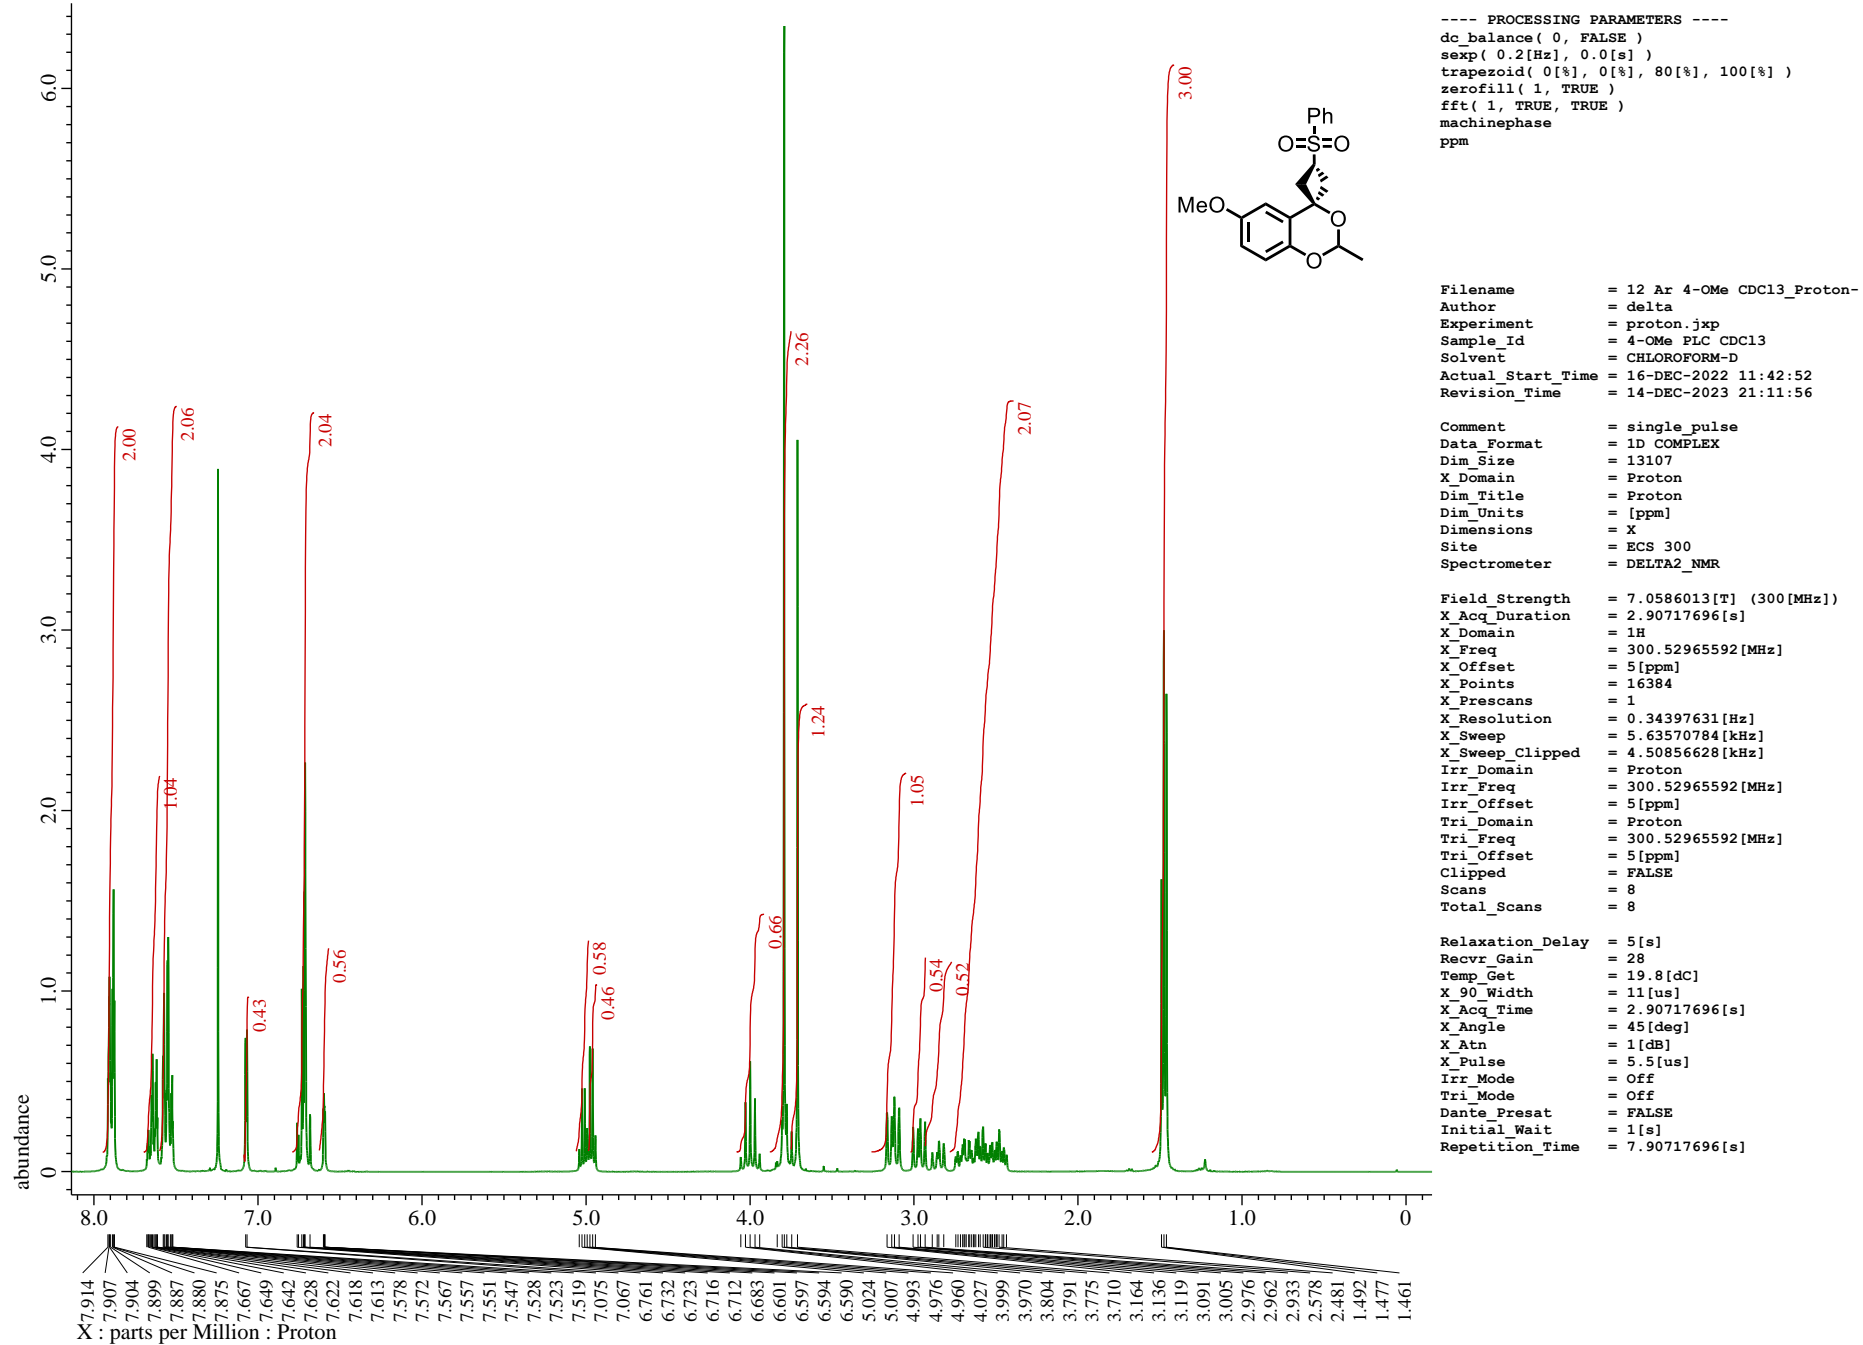

<sup>1</sup>H NMR spectrum of **2b/2b'** (300 MHz, CDCl<sub>3</sub>)



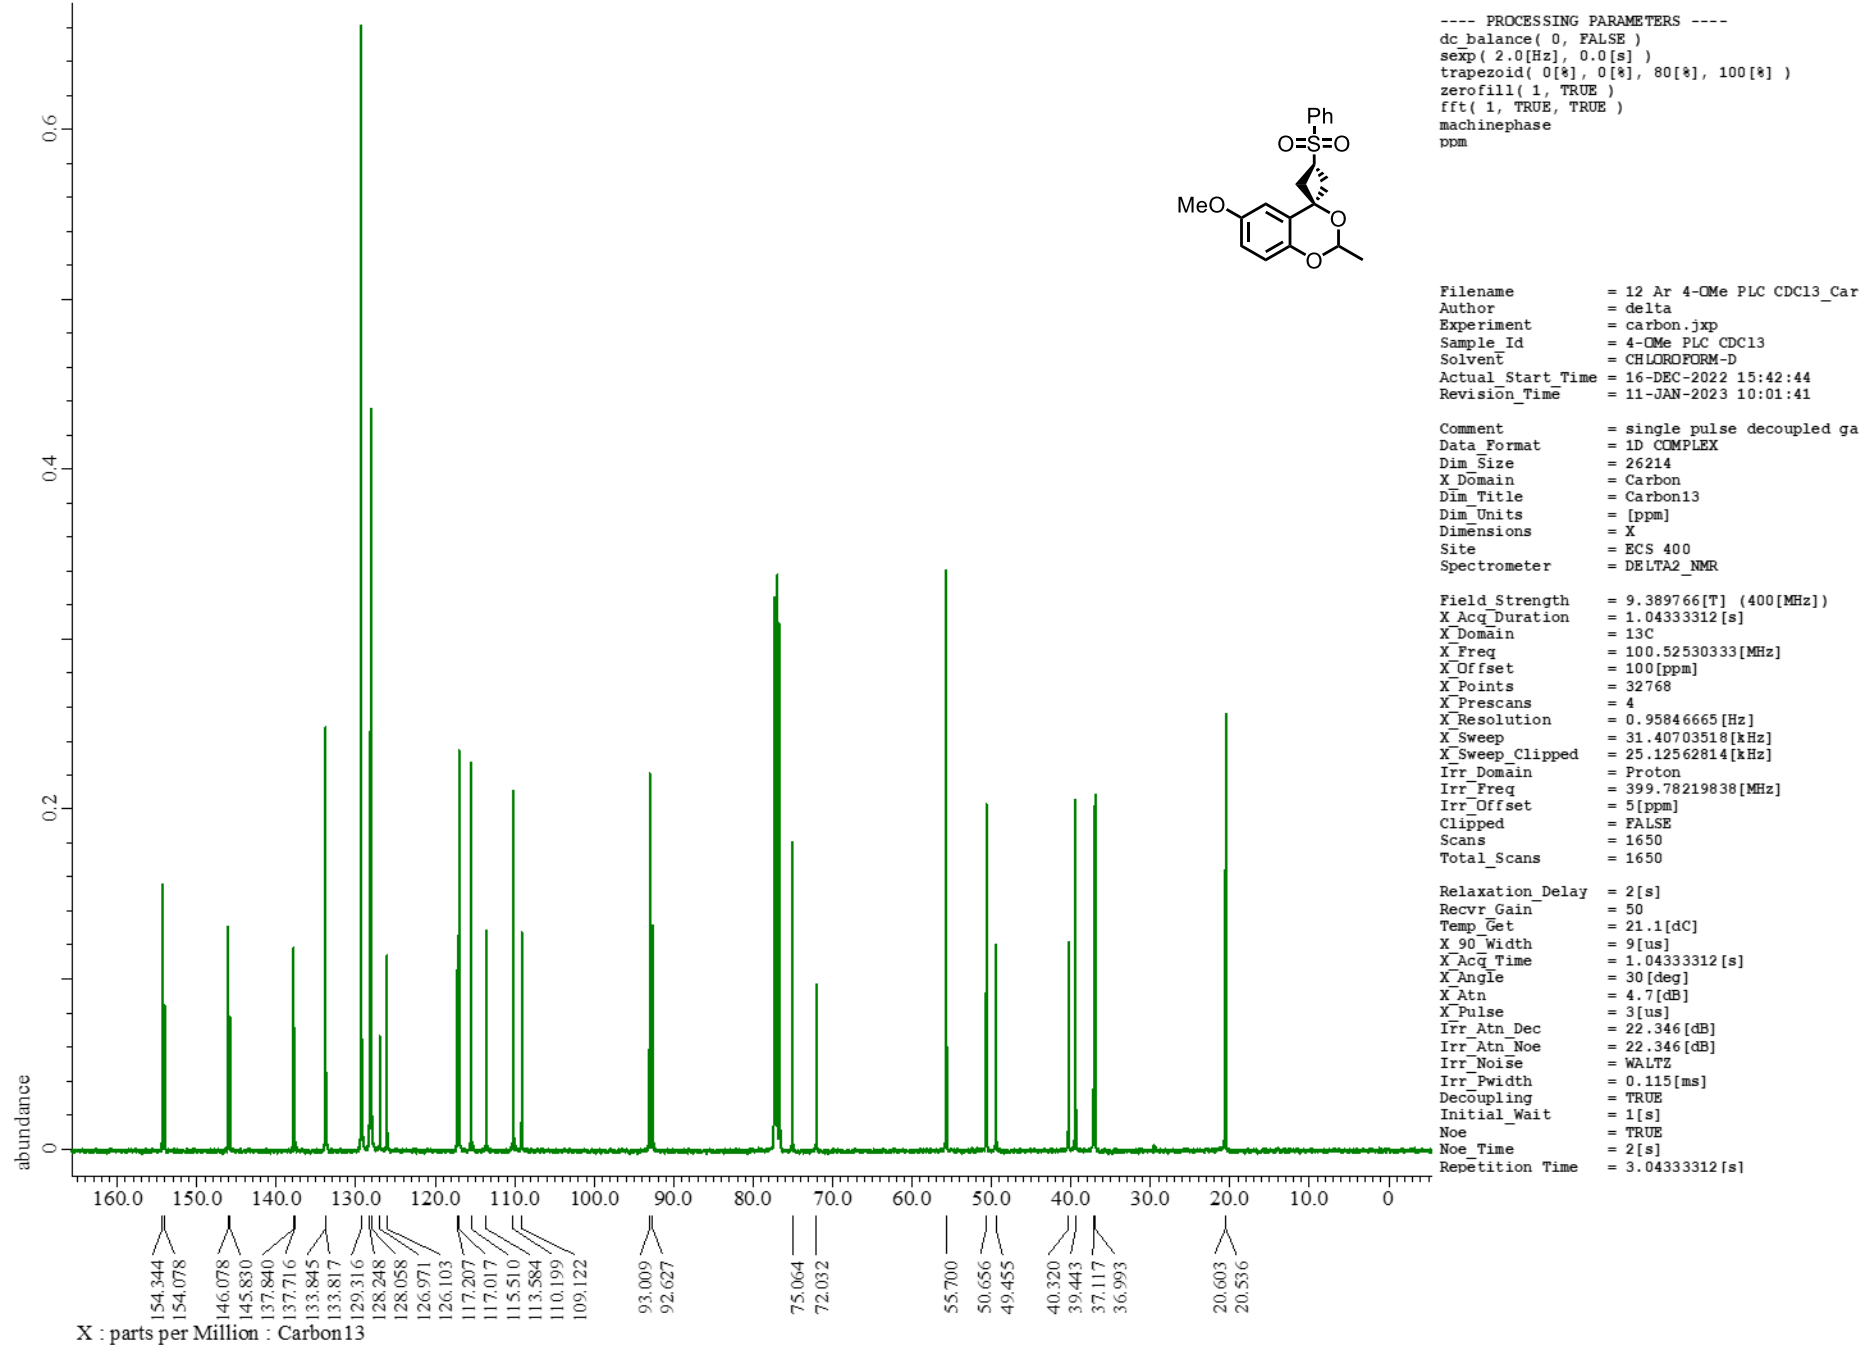

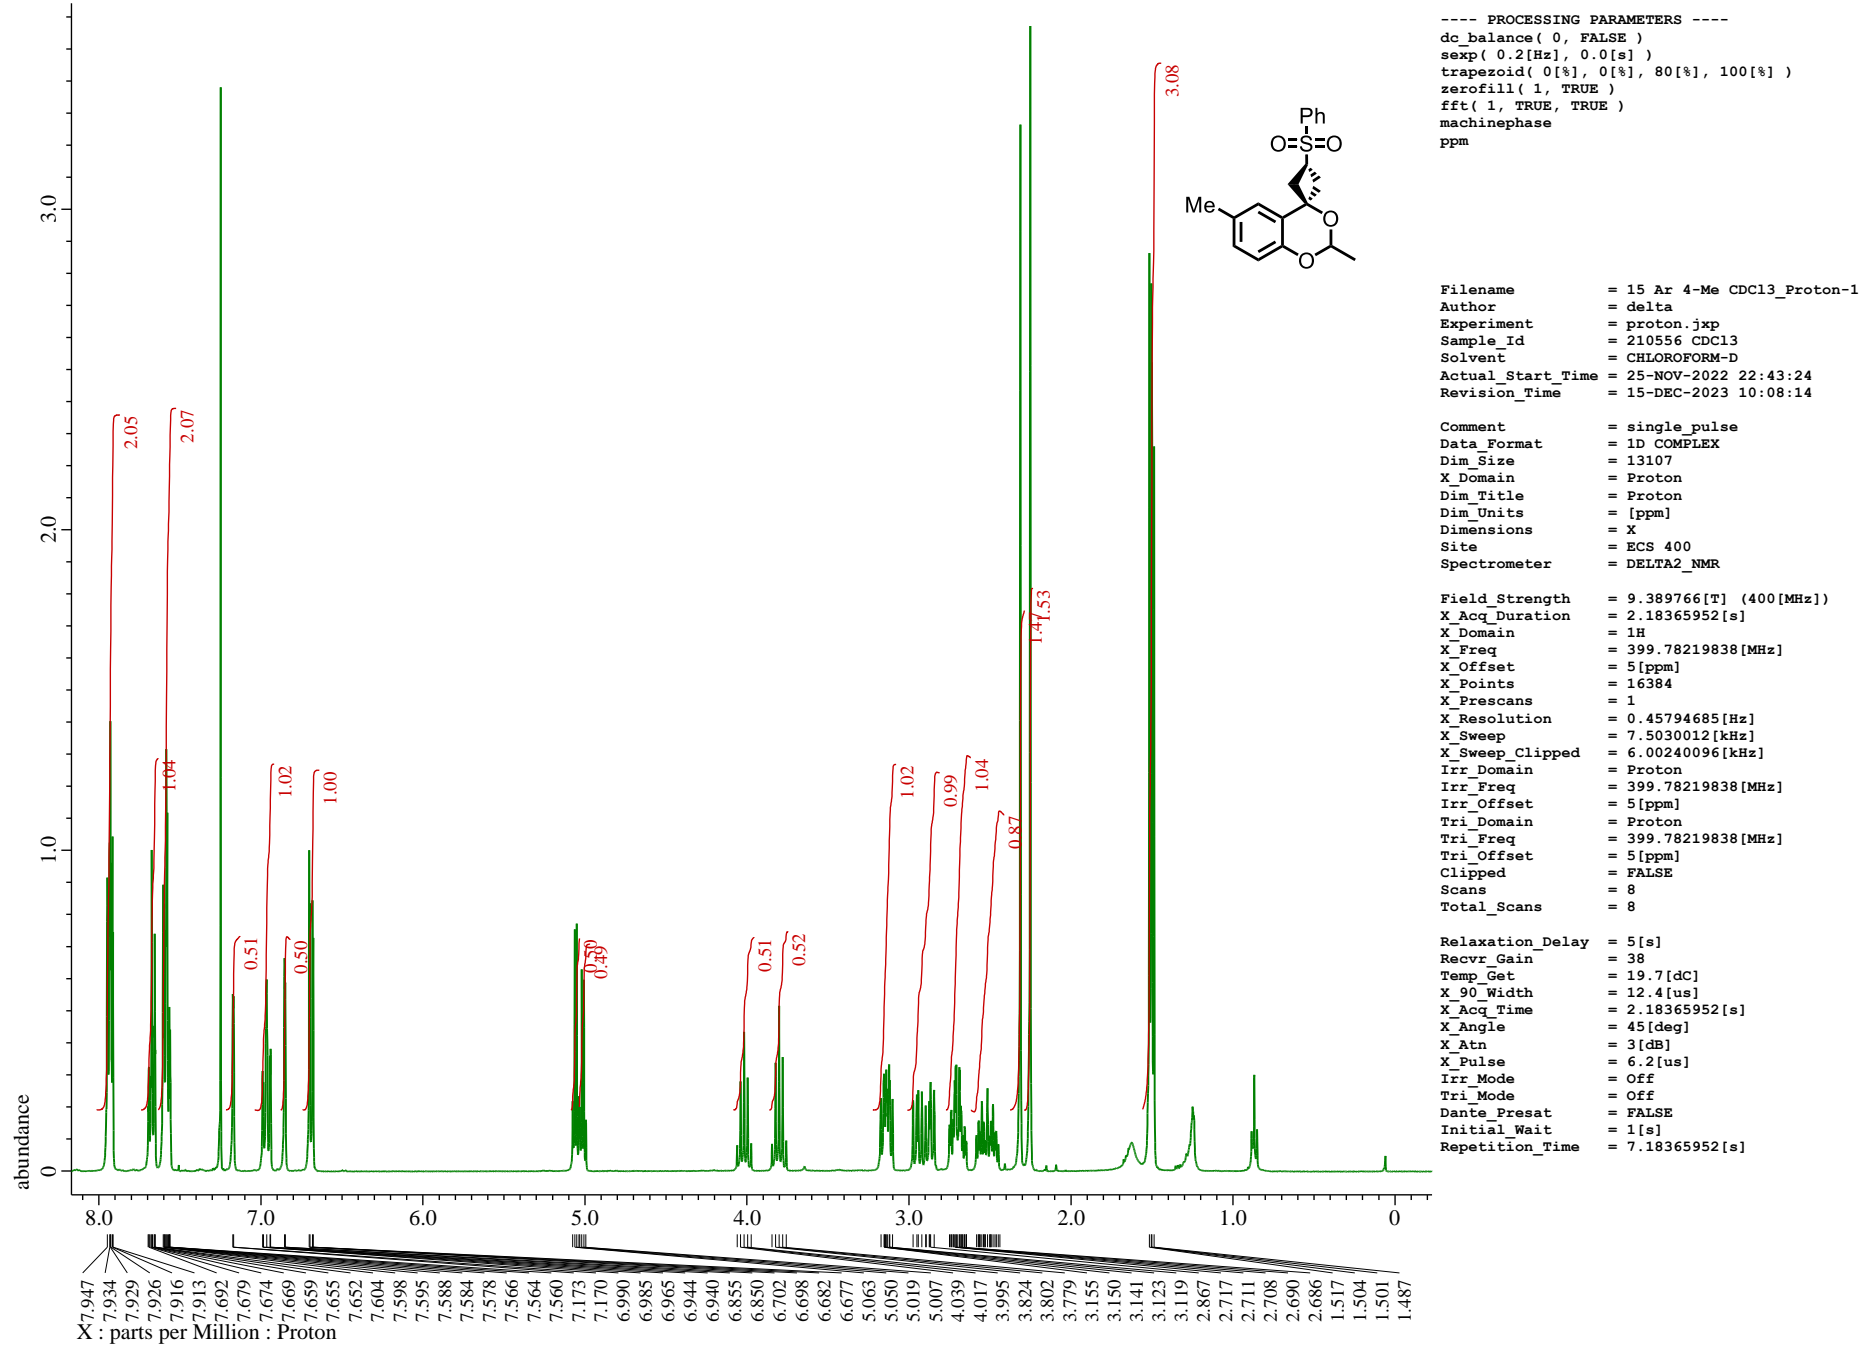

<sup>1</sup>H NMR spectrum of **2c/2c'** (400 MHz, CDCl<sub>3</sub>)

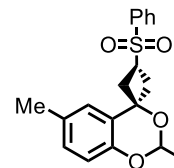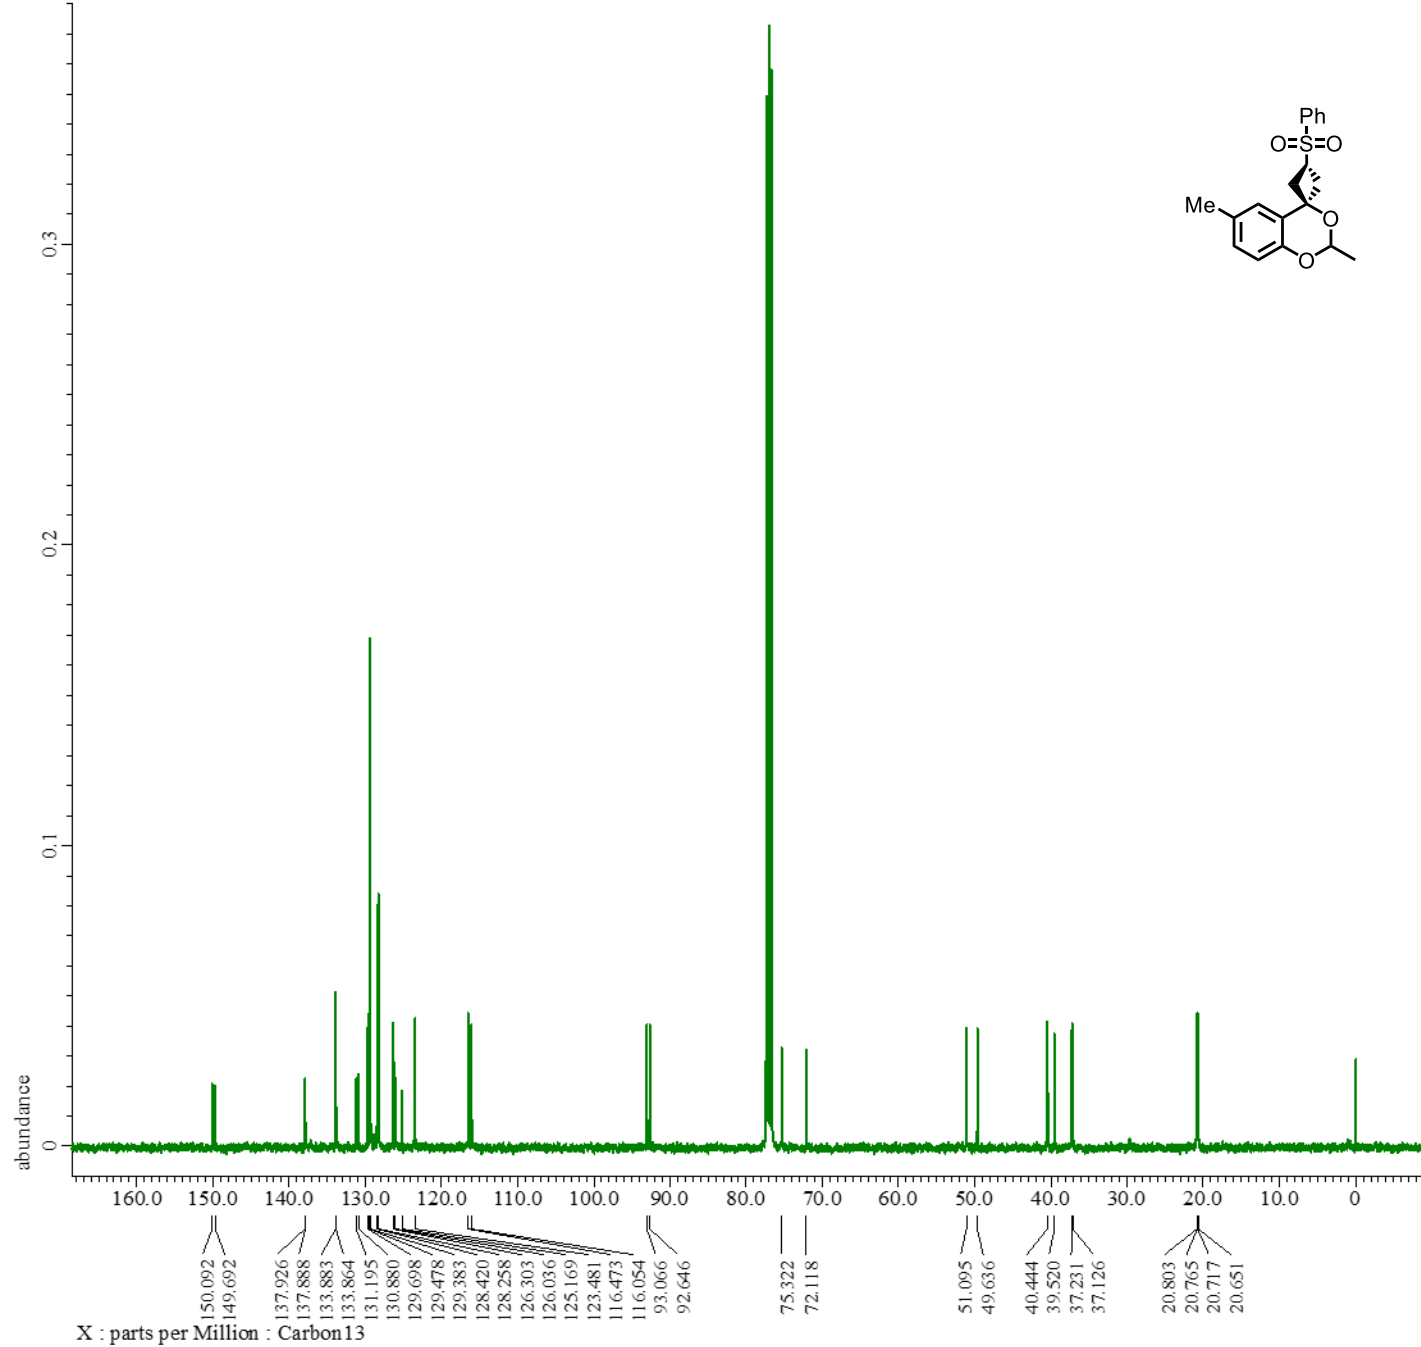

```

---- PROCESSING PARAMETERS ----
dc balance( 0, FALSE )
sexp( 2.0[Hz], 0.0[s] )
trapezoid( 0[8], 0[8], 80[8], 100[8] )
zerofill( 1, TRUE )
fft( 1, TRUE, TRUE )
machinephase
ppm

Filename      = 15 Ar 4-Me CDC13_Carbon-1
Author       = delta
Experiment   = carbon.jxp
Sample Id    = 210556 3 CDC13
Solvent      = CHLOROFORM-D
Actual Start Time = 16-NOV-2022 03:05:51
Revision Time   = 11-JAN-2023 11:03:31

Comment      = single pulse decoupled ga
Data Format   = 1D COMPLEX
Dim Size     = 26214
X_Domain     = Carbon
Dim Title    = Carbon13
Dim Units    = [ppm]
Dimensions   = X
Site         = ECS 400
Spectrometer = DELTA2_NMR

Field Strength = 9.389766[T] (400[MHz])
X_Acq_Duration = 1.04333312[s]
X_Domain       = 13C
X_Freq        = 100.52530333[MHz]
X_Offset      = 100[ppm]
X_Points      = 32768
X_Prescans    = 4
X_Resolution  = 0.95846665[Hz]
X_Sweep       = 31.40703518[kHz]
X_Sweep_Clipped = 25.12562814[kHz]
Irr_Domain    = Proton
Irr_Freq     = 399.78219838[MHz]
Irr_Offset    = 5[ppm]
Clipped      = FALSE
Scans        = 1150
Total_Scans  = 1150

Relaxation_Delay = 2[s]
Recvr Gain      = 50
Temp_Get       = 20[dC]
X_90_Width     = 9[us]
X_Acq_Time     = 1.04333312[s]
X_Angle        = 30[deg]
X_Atn         = 4.7[dB]
X_Pulse       = 3[us]
Irr_Atn_Dec   = 22.346[dB]
Irr_Atn_Noise = 22.346[dB]
Irr_Noise     = WALTZ
Irr_Pwidth    = 0.115[ms]
Decoupling    = TRUE
Initial_Wait  = 1[s]
Noe           = TRUE
Noe_Time      = 2[s]
Repetition Time = 3.04333312[s]

```

<sup>13</sup>C NMR spectrum of 2c/2c' (101 MHz, CDCl<sub>3</sub>)

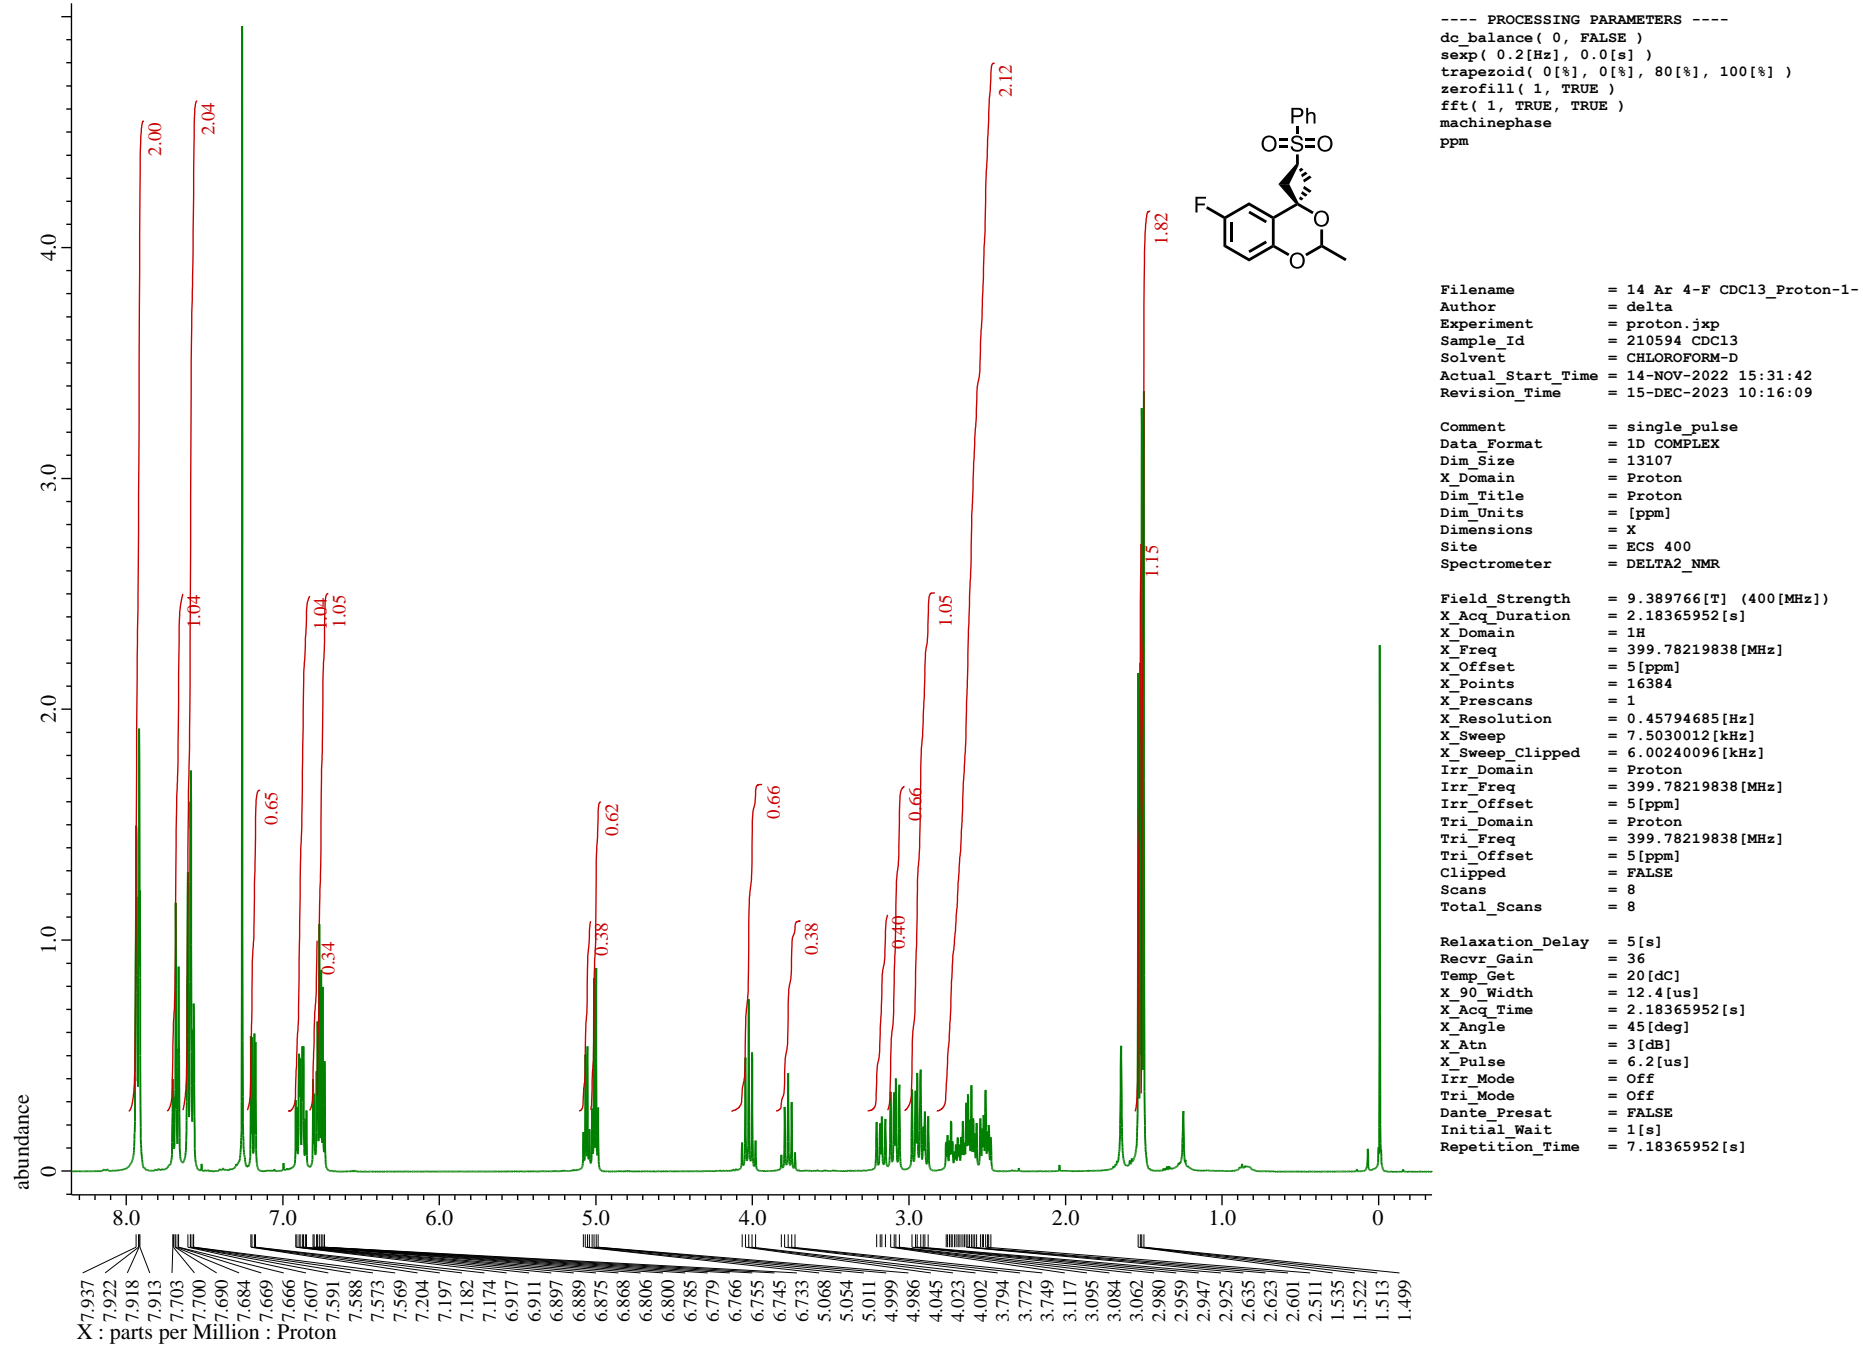

<sup>1</sup>H NMR spectrum of **2d/2d'** (400 MHz, CDCl<sub>3</sub>)

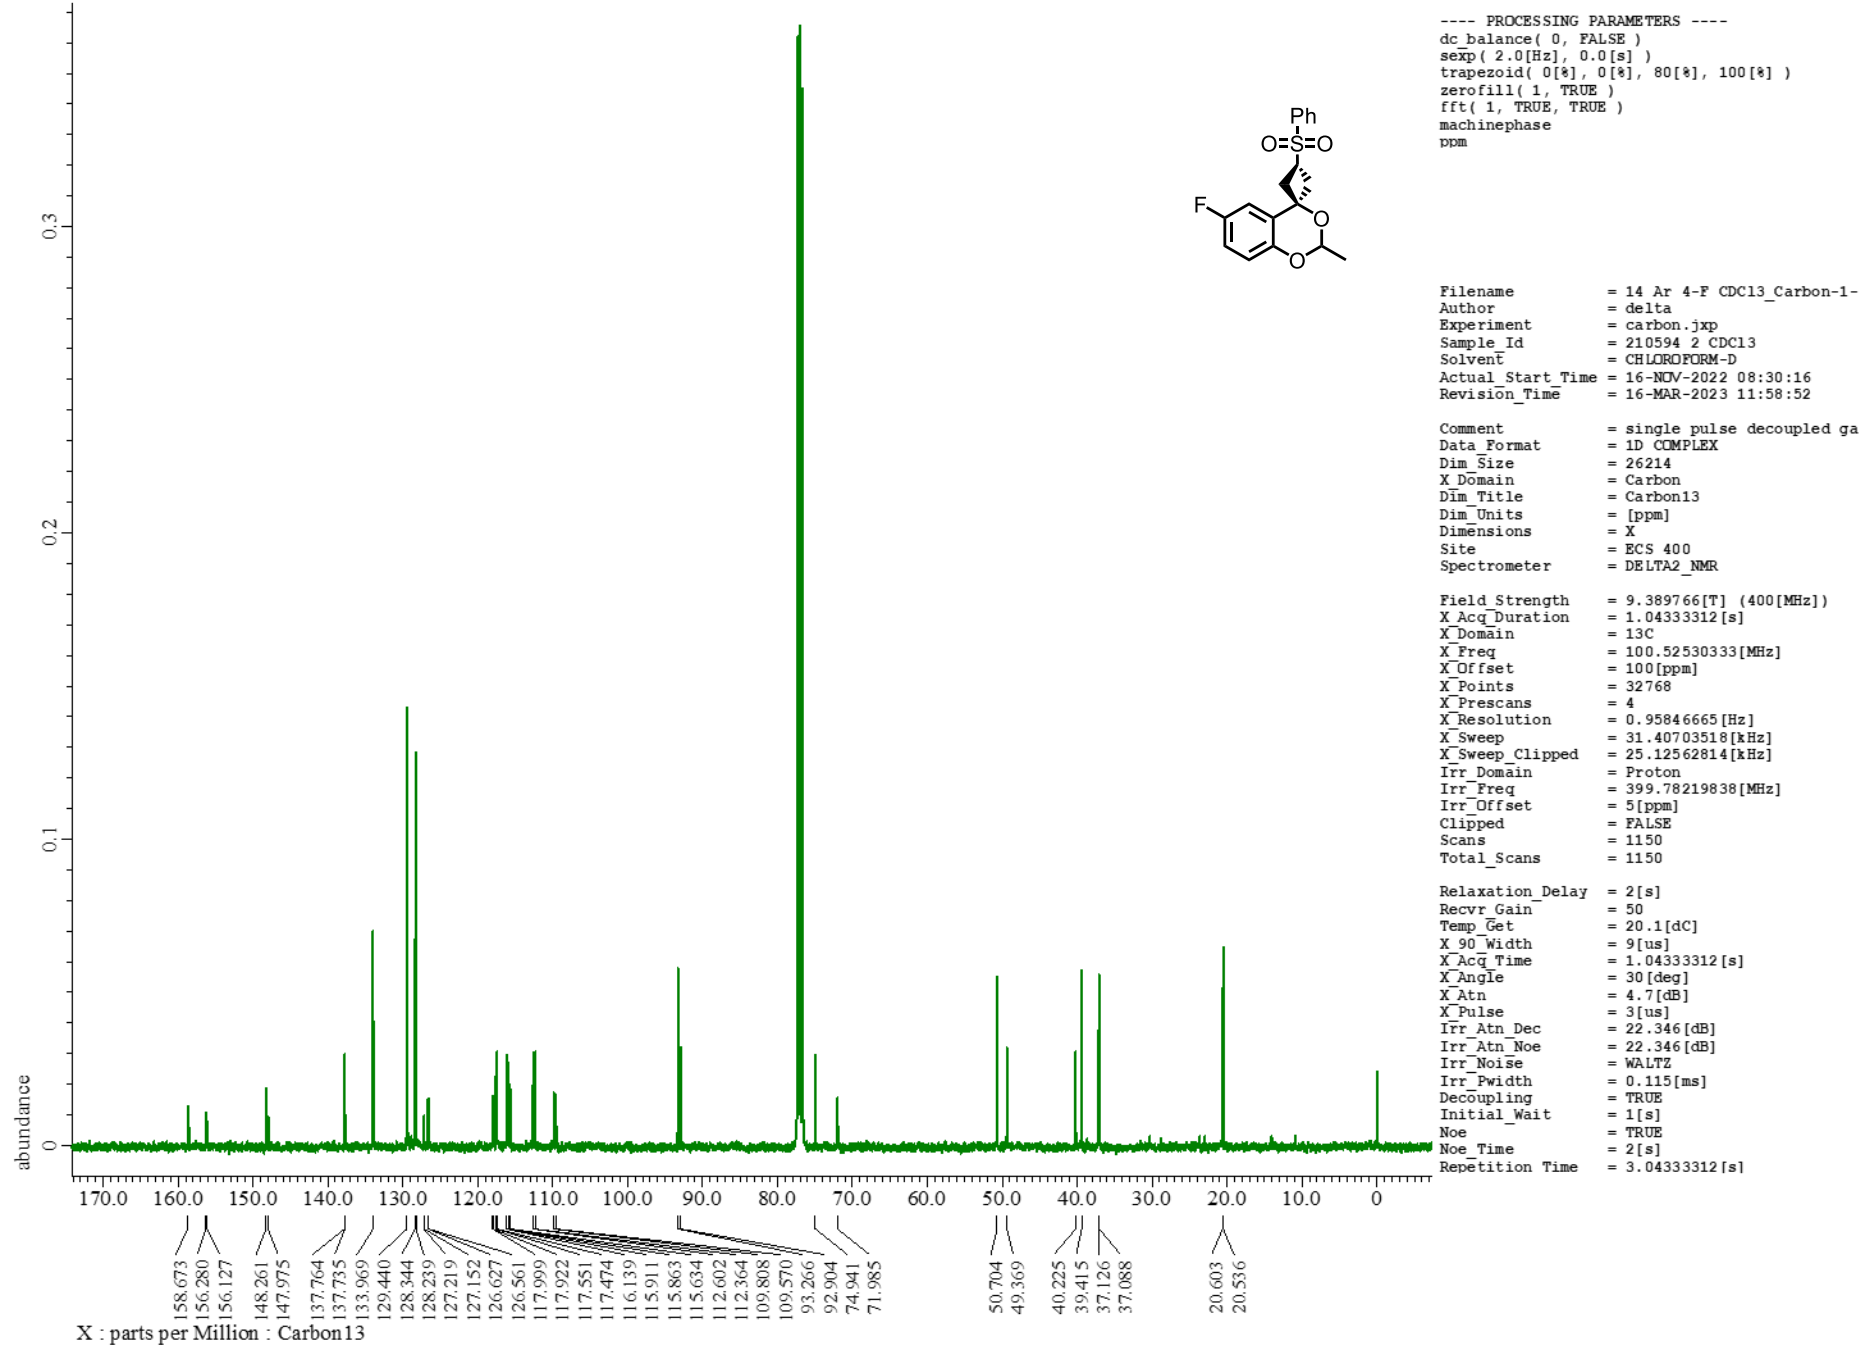

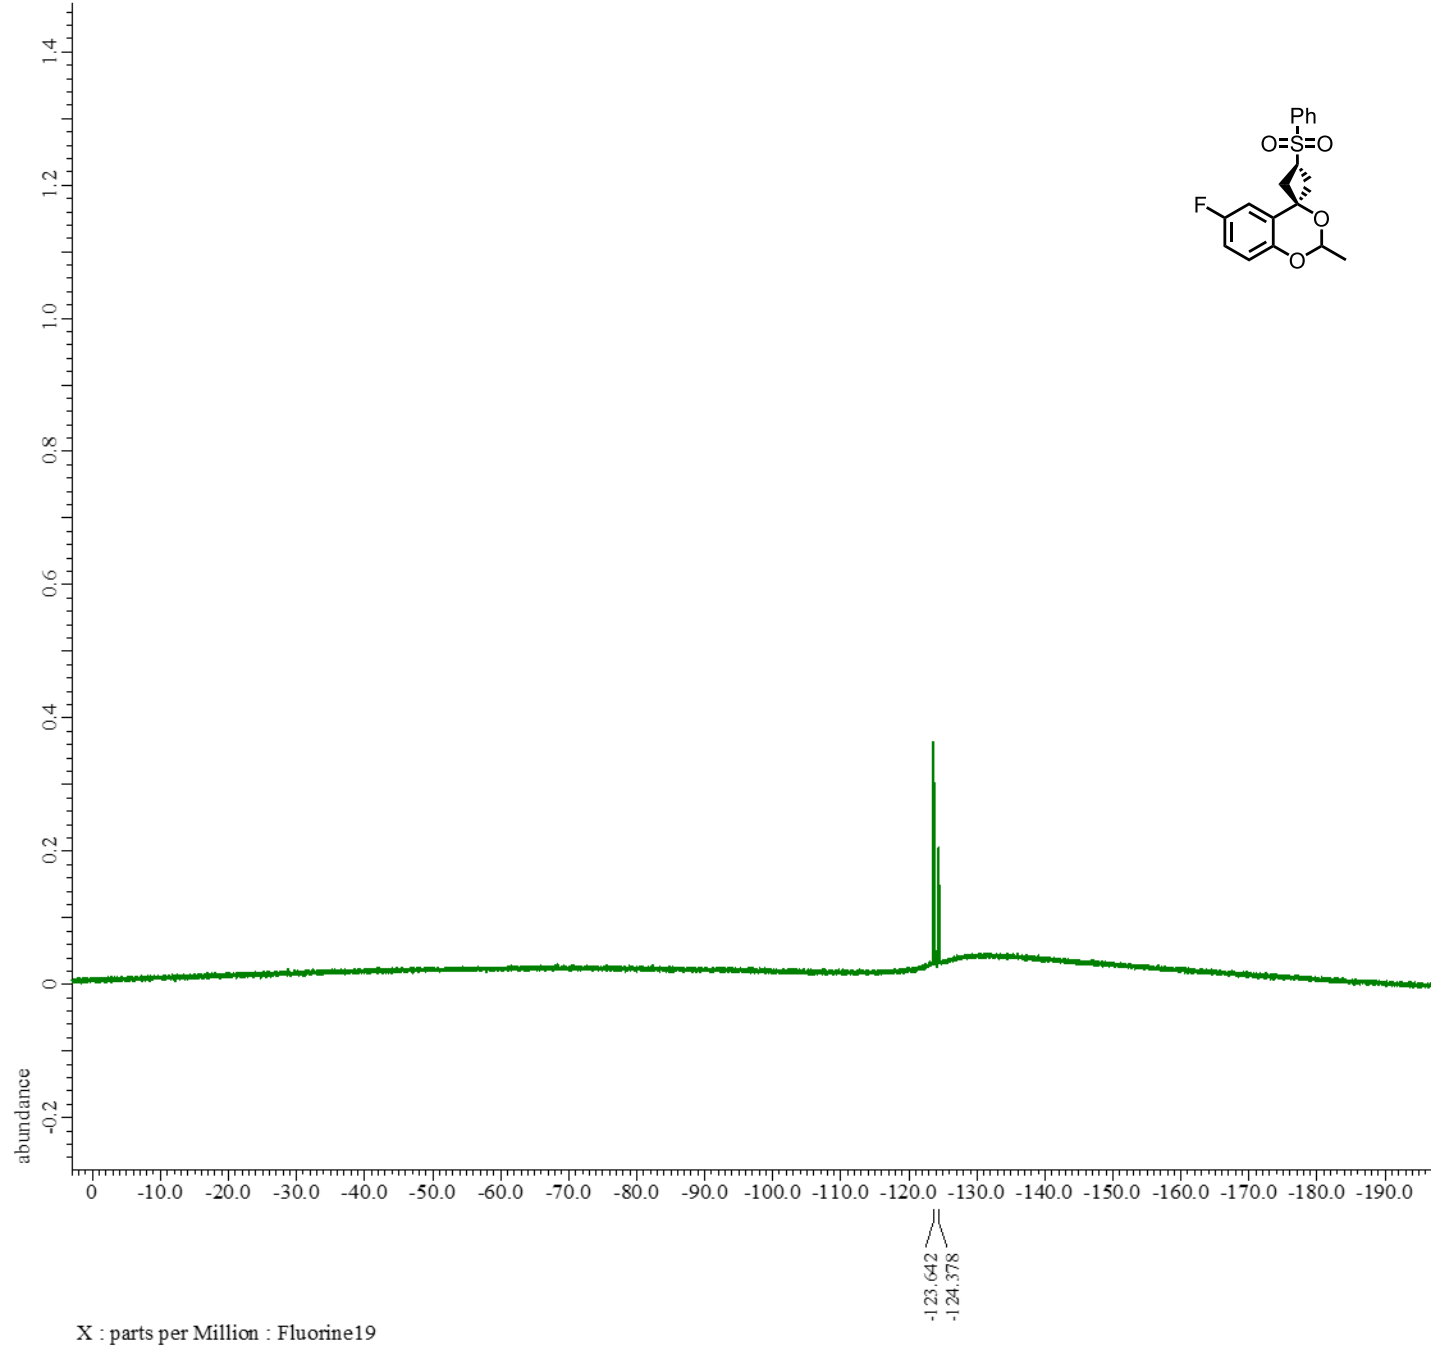

```

---- PROCESSING PARAMETERS ----
dc balance( 0, FALSE )
sexp( 0.2[Hz], 0.0[s] )
trapezoid( 0[8], 0[8], 80[8], 100[8] )
zerofill( 1, TRUE )
fft( 1, TRUE, TRUE )
machinephase
ppm

Filename           = 14 Ar 4-F CDC13-4.jdf
Author            = delta
Experiment        = single_pulse.jxp
Sample Id         = 210664-665 column CDC13
Solvent          = CHLOROFORM-D
Actual Start Time = 22-DEC-2022 10:23:58
Revision Time    = 17-MAR-2023 16:50:43

Comment           = single pulse
Data Format        = 1D COMPLEX
Dim Size         = 13107
X_Domain         = Fluori
Dim Title        = Fluorine19
Dim Units        = [ppm]
Dimensions       = X
Site             = ECS 300
Spectrometer     = DELTA2_NMR

Field Strength    = 7.0586013[T] (300 [MHz])
X_Acq_Duration   = 0.15368192 [s]
X_Domain         = 19F
X_Freq           = 282.78036857 [MHz]
X_Offset         = -80 [ppm]
X_Points         = 16384
X_Prescans       = 1
X_Resolution     = 6.5069463 [Hz]
X_Sweep          = 106.6098081 [kHz]
X_Sweep_Clipped = 85.28784648 [kHz]
Irr_Domain       = Fluorine19
Irr_Freq        = 282.78036857 [MHz]
Irr_Offset       = 5 [ppm]
Tri_Domain       = Fluorine19
Tri_Freq        = 282.78036857 [MHz]
Tri_Offset       = 5 [ppm]
Clipped         = FALSE
Scans           = 16
Total_Scans     = 16

Relaxation Delay = 5 [s]
Recvr_Gain       = 32
Temp_Get        = 18.9 [dC]
X_90_Width      = 12 [us]
X_Acq_Time      = 0.15368192 [s]
X_Angle         = 45 [deg]
X_Atn           = 2.8 [dB]
X_Pulse         = 6 [us]
Irr_Mode        = Off
Tri_Mode        = Off
DanTe_Presat   = FALSE
Initial Wait    = 1 [s]
Repetition Time = 5.15368192 [s]

```

X : parts per Million : Fluorine19

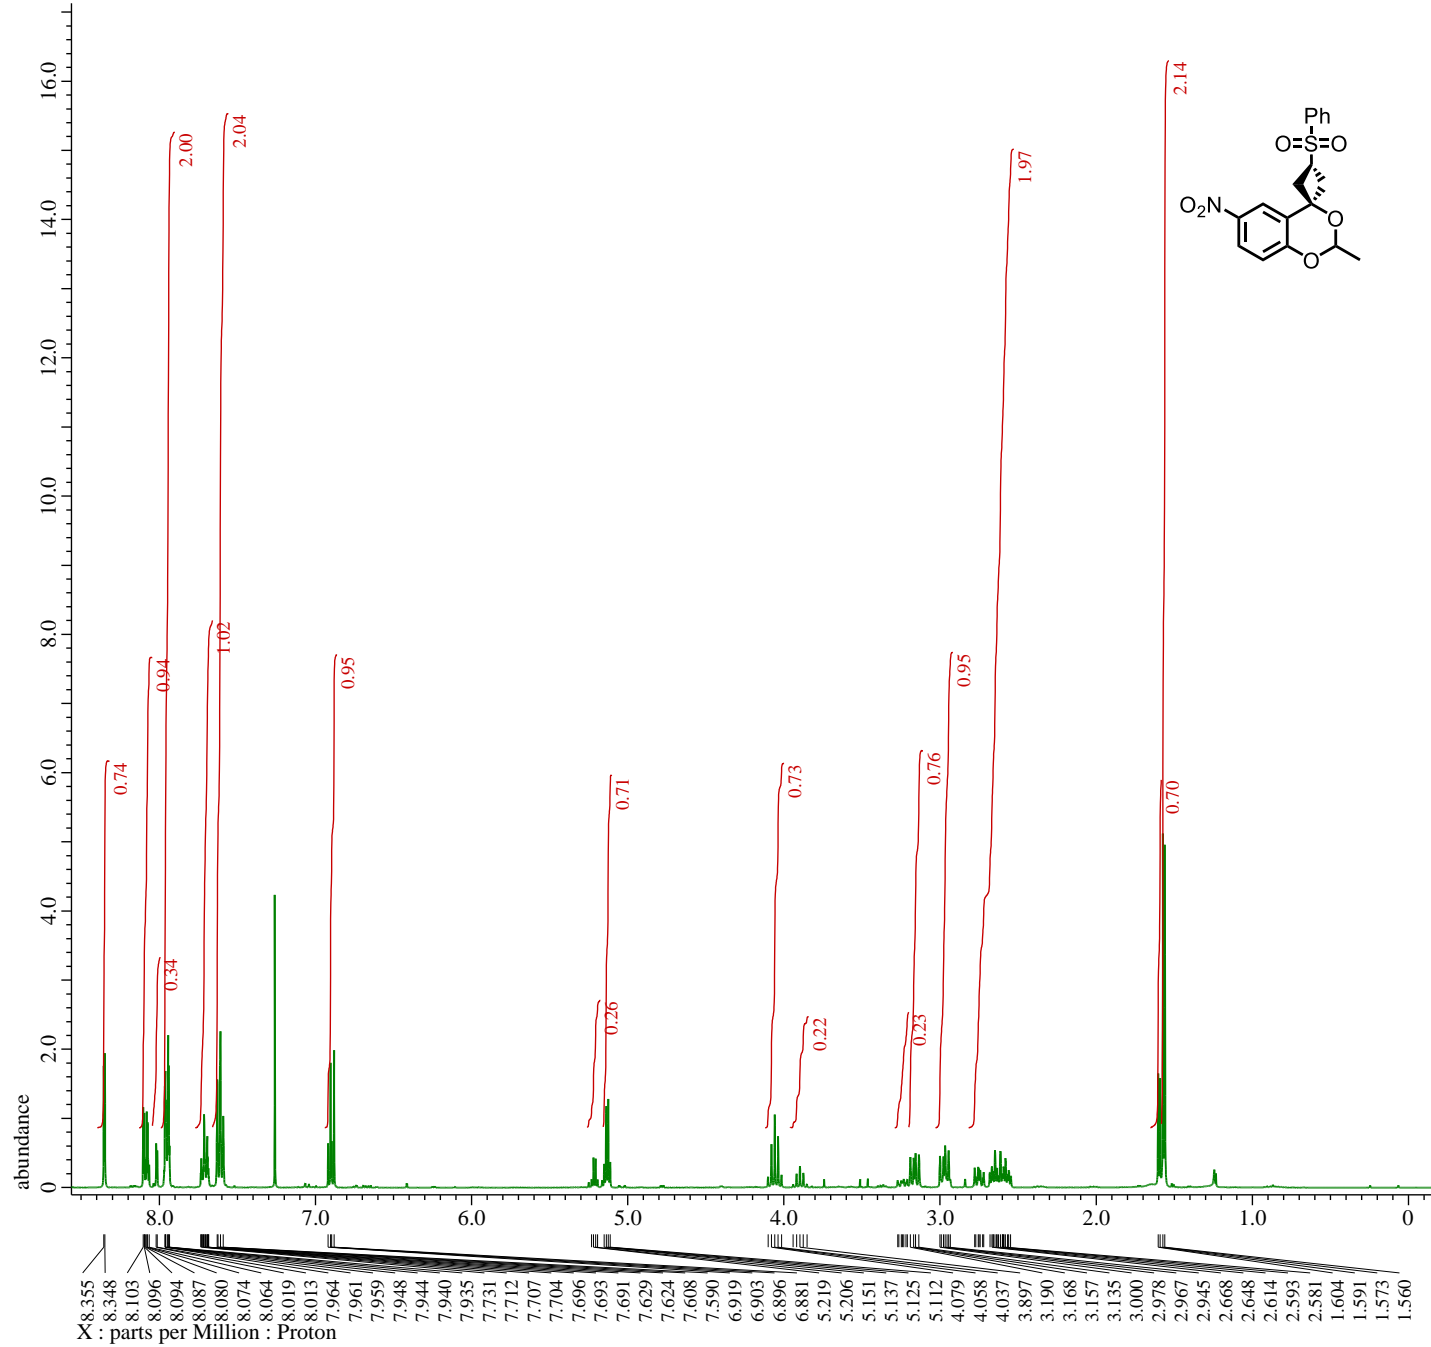

```

---- PROCESSING PARAMETERS ----
dc_balance( 0, FALSE )
sexp( 0.2[Hz], 0.0[s] )
trapezoid( 0[%], 0[%], 80[%], 100[%] )
zerofill( 1, TRUE )
fft( 1, TRUE, TRUE )
machinephase
ppm

```

```

Filename      = 13 Ar 4-NO2 CDCL3_Proton-
Author       = delta
Experiment    = proton.jxp
Sample_Id    = 4-NO2 PLC CDCL3
Solvent      = CHLOROFORM-D
Actual_Start_Time = 19-DEC-2022 22:24:43
Revision_Time  = 15-DEC-2023 10:25:04

```

```

Comment       = single_pulse
Data_Format   = 1D COMPLEX
Dim_Size      = 13107
X_Domain      = Proton
Dim_Title     = Proton
Dim_Units     = [ppm]
Dimensions    = X
Site          = ECS 400
Spectrometer  = DELTA2_NMR

```

```

Field_Strength = 9.389766[T] (400[MHz])
X_Acq_Duration = 2.18365952[s]
X_Domain       = 1H
X_Freq         = 399.78219838[MHz]
X_Offset       = 5[ppm]
X_Points       = 16384
X_Prescans     = 1
X_Resolution   = 0.45794685[Hz]
X_Sweep        = 7.5030012[kHz]
X_Sweep_Clippped = 6.00240096[kHz]
Irr_Domain     = Proton
Irr_Freq       = 399.78219838[MHz]
Irr_Offset     = 5[ppm]
Tri_Domain     = Proton
Tri_Freq       = 399.78219838[MHz]
Tri_Offset     = 5[ppm]
Clipped        = FALSE
Scans          = 8
Total_Scans    = 8

```

```

Relaxation_Delay = 5[s]
Recvr_Gain       = 38
Temp_Get         = 20.6[dC]
X_90_Width       = 12.4[us]
X_Acq_Time       = 2.18365952[s]
X_Angle          = 45[deg]
X_Atn           = 3[dB]
X_Pulse          = 6.2[us]
Irr_Mode         = Off
Tri_Mode         = Off
Dante_Presat     = FALSE
Initial_Wait     = 1[s]
Repetition_Time  = 7.18365952[s]

```

<sup>1</sup>H NMR spectrum of 2e/2e' (400 MHz, CDCl<sub>3</sub>)

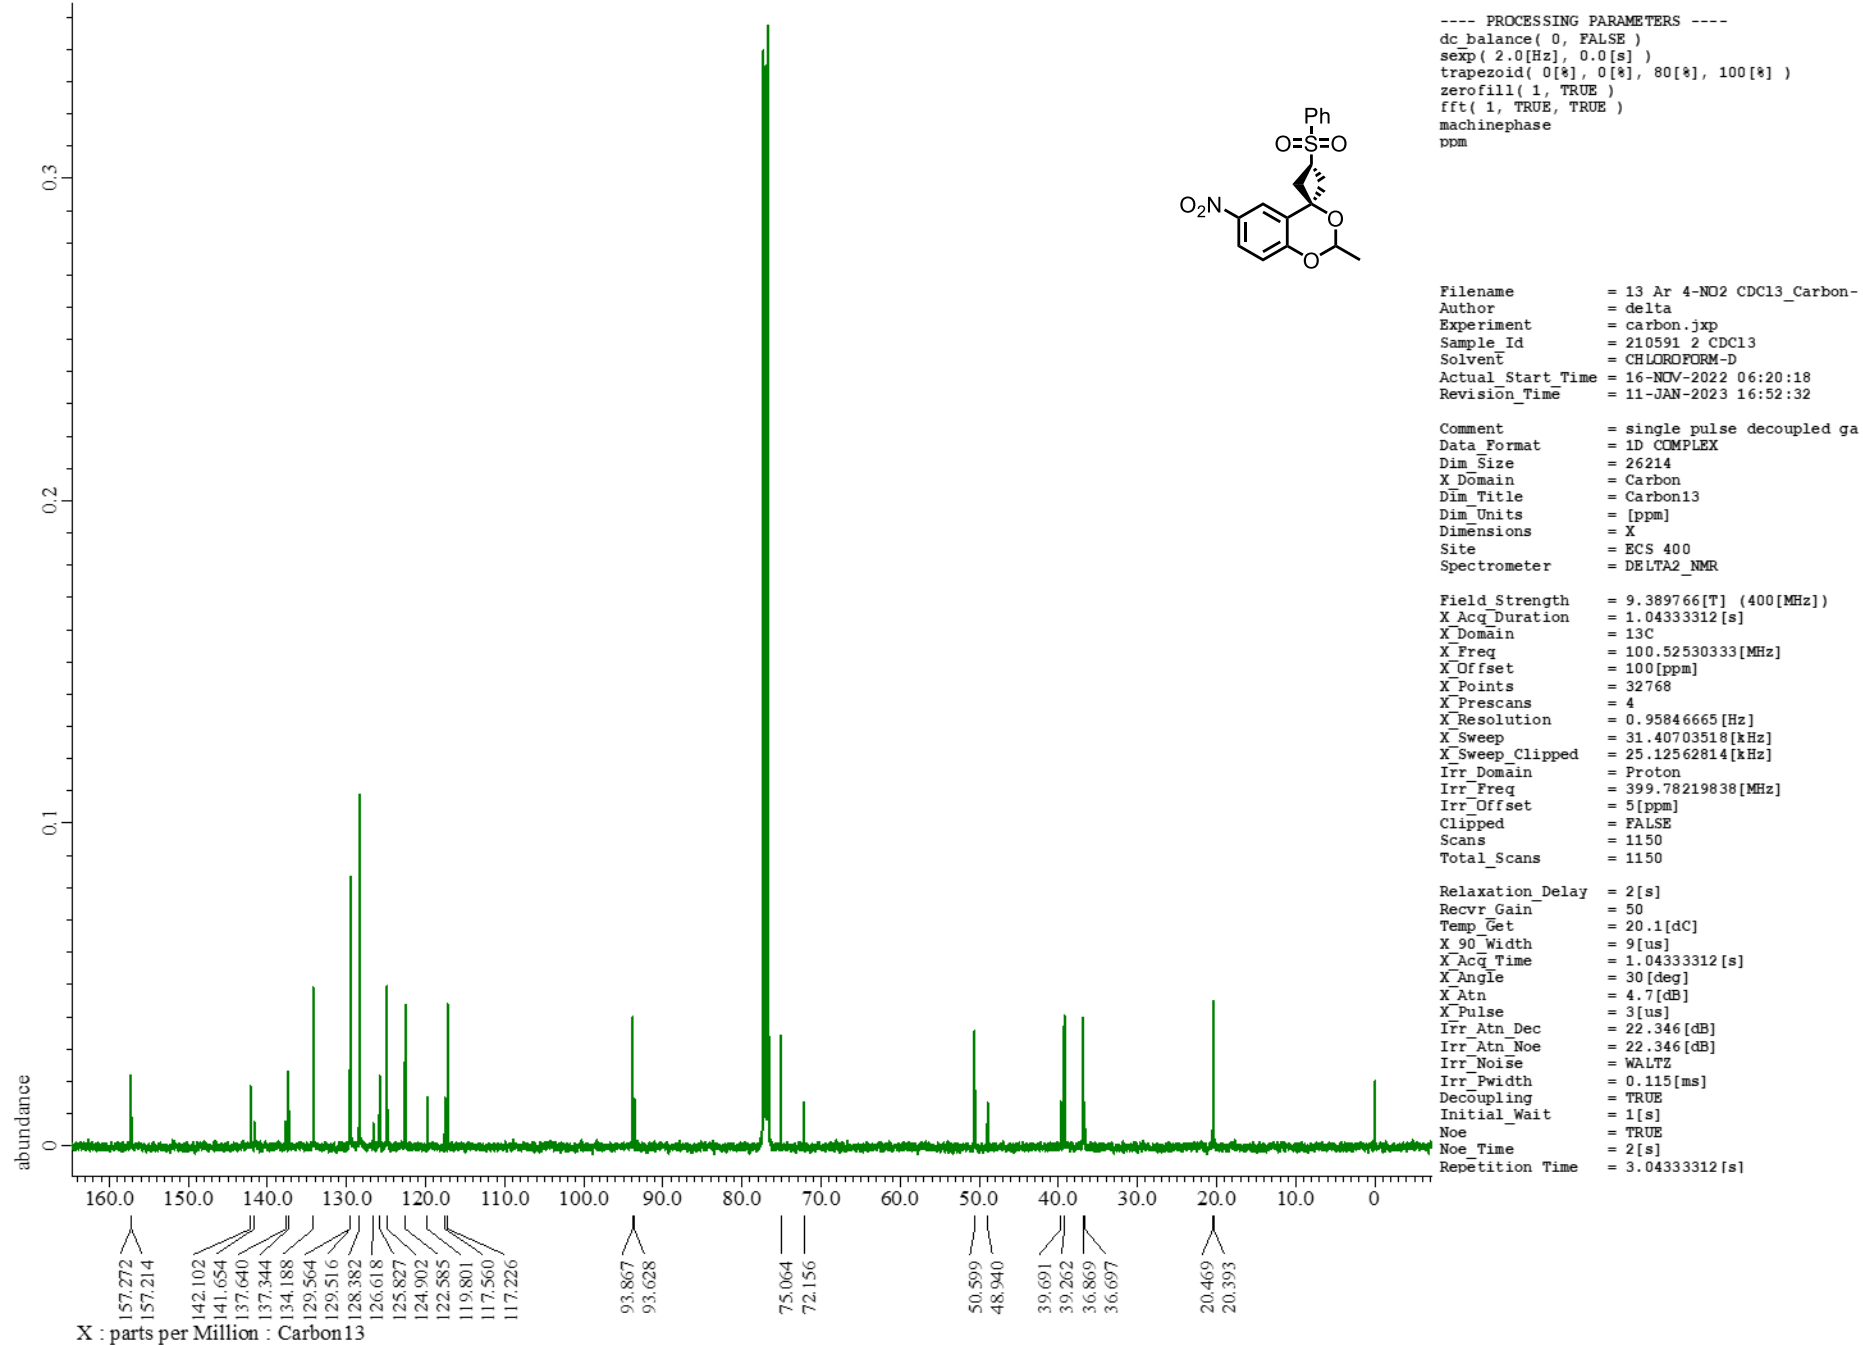



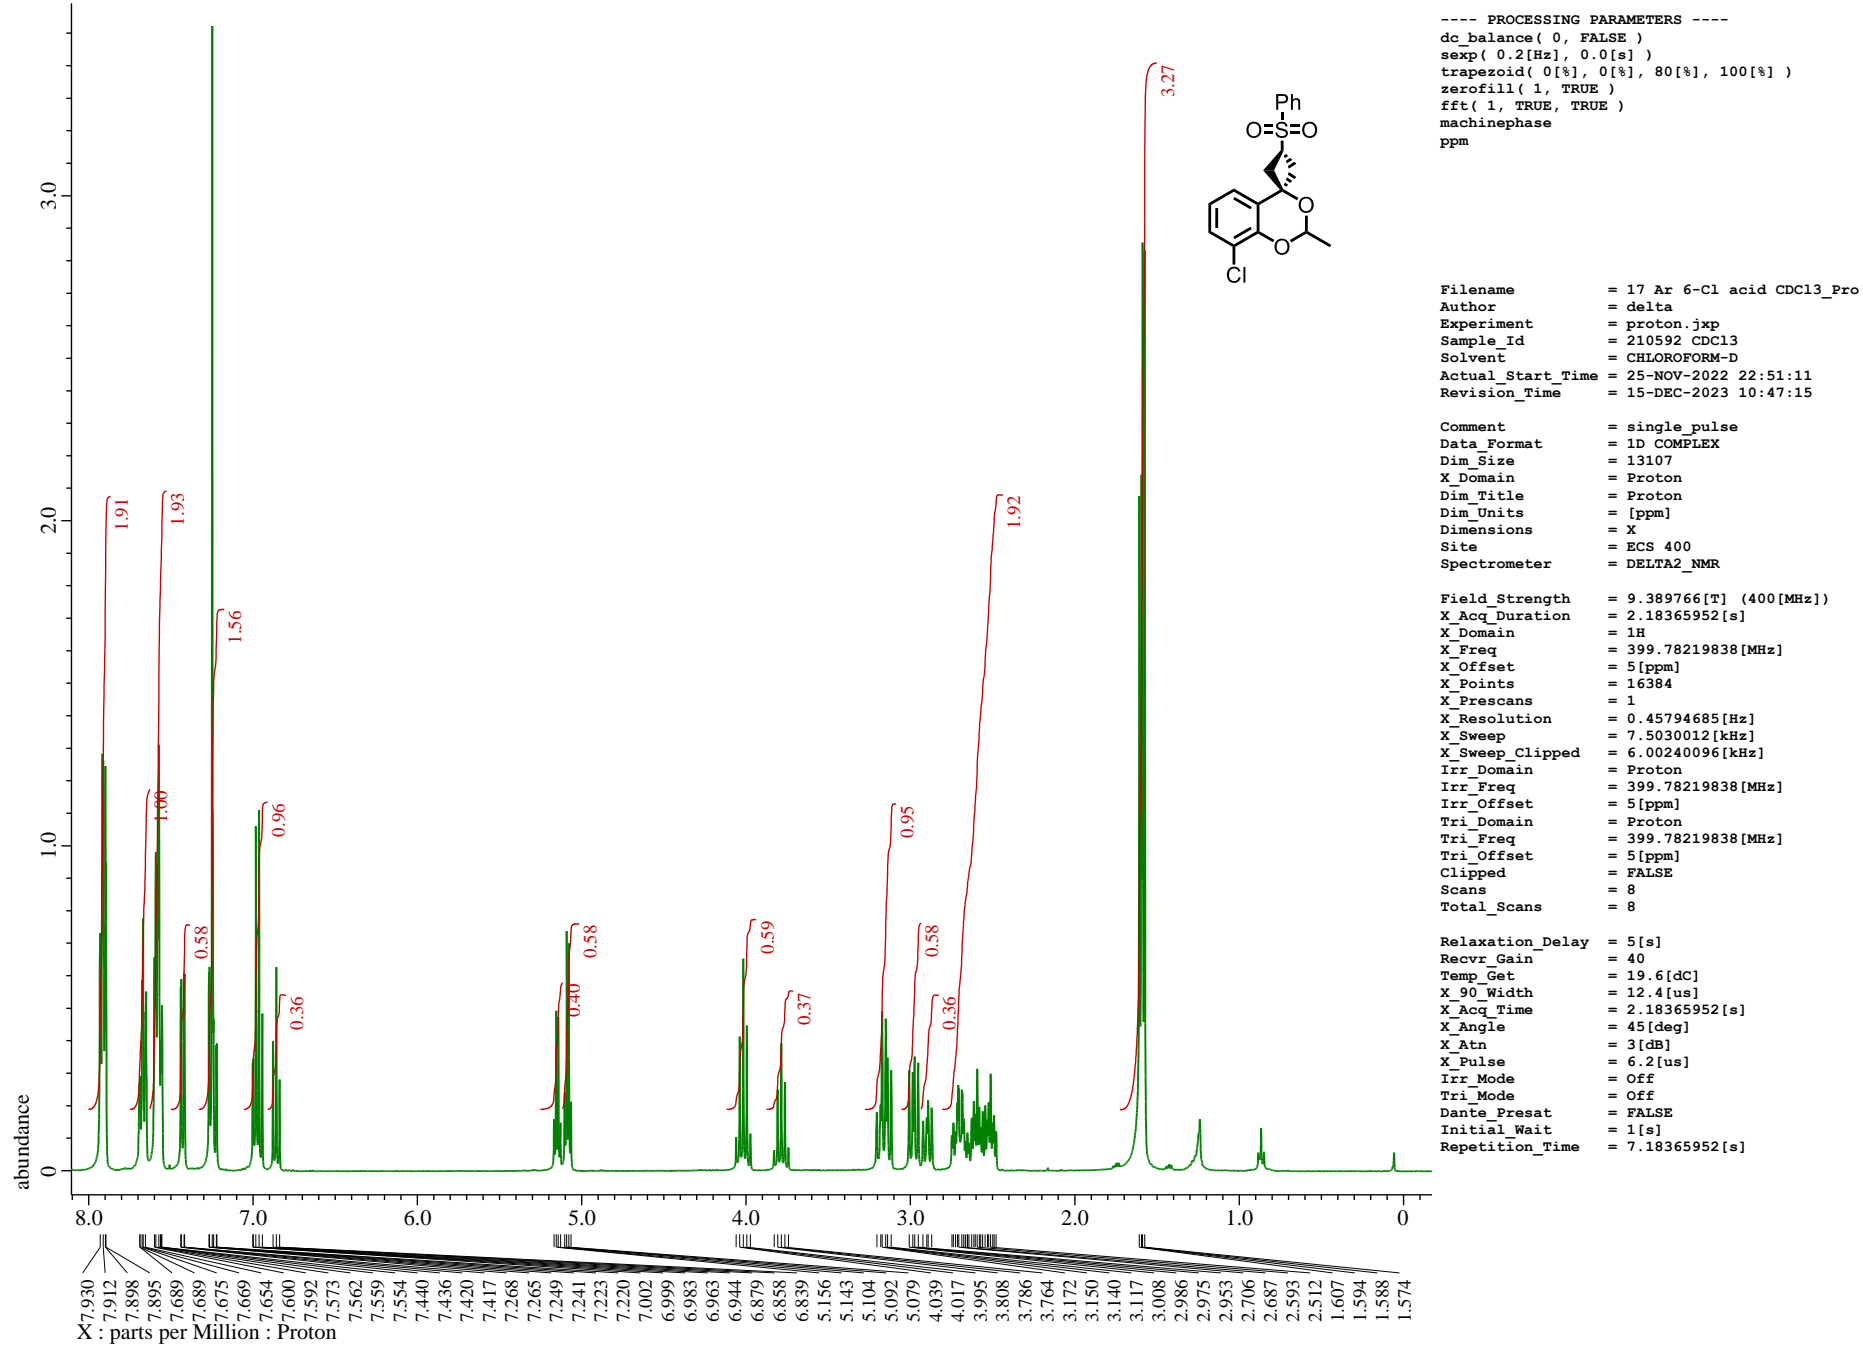

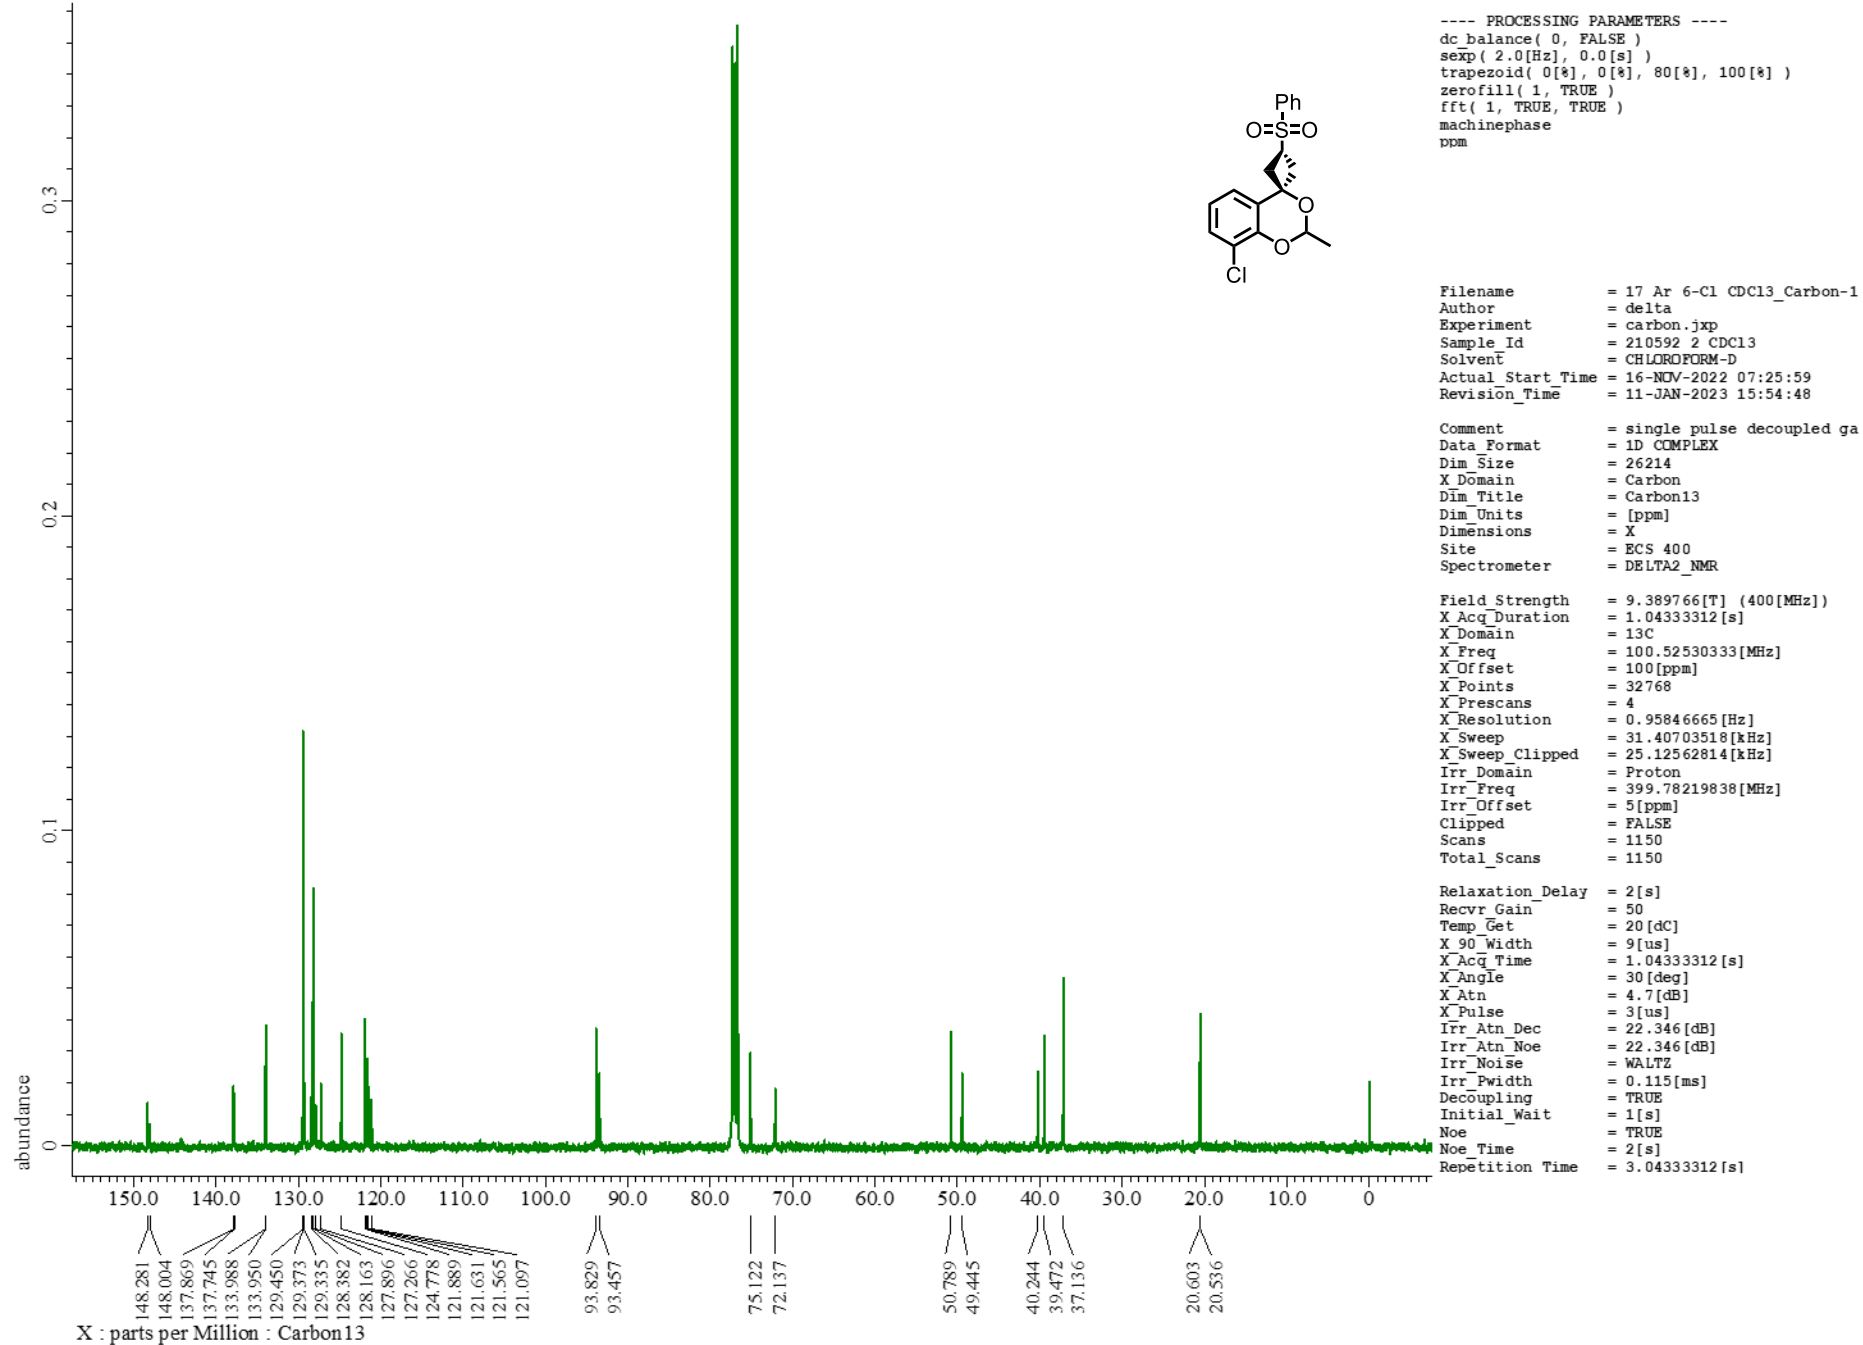

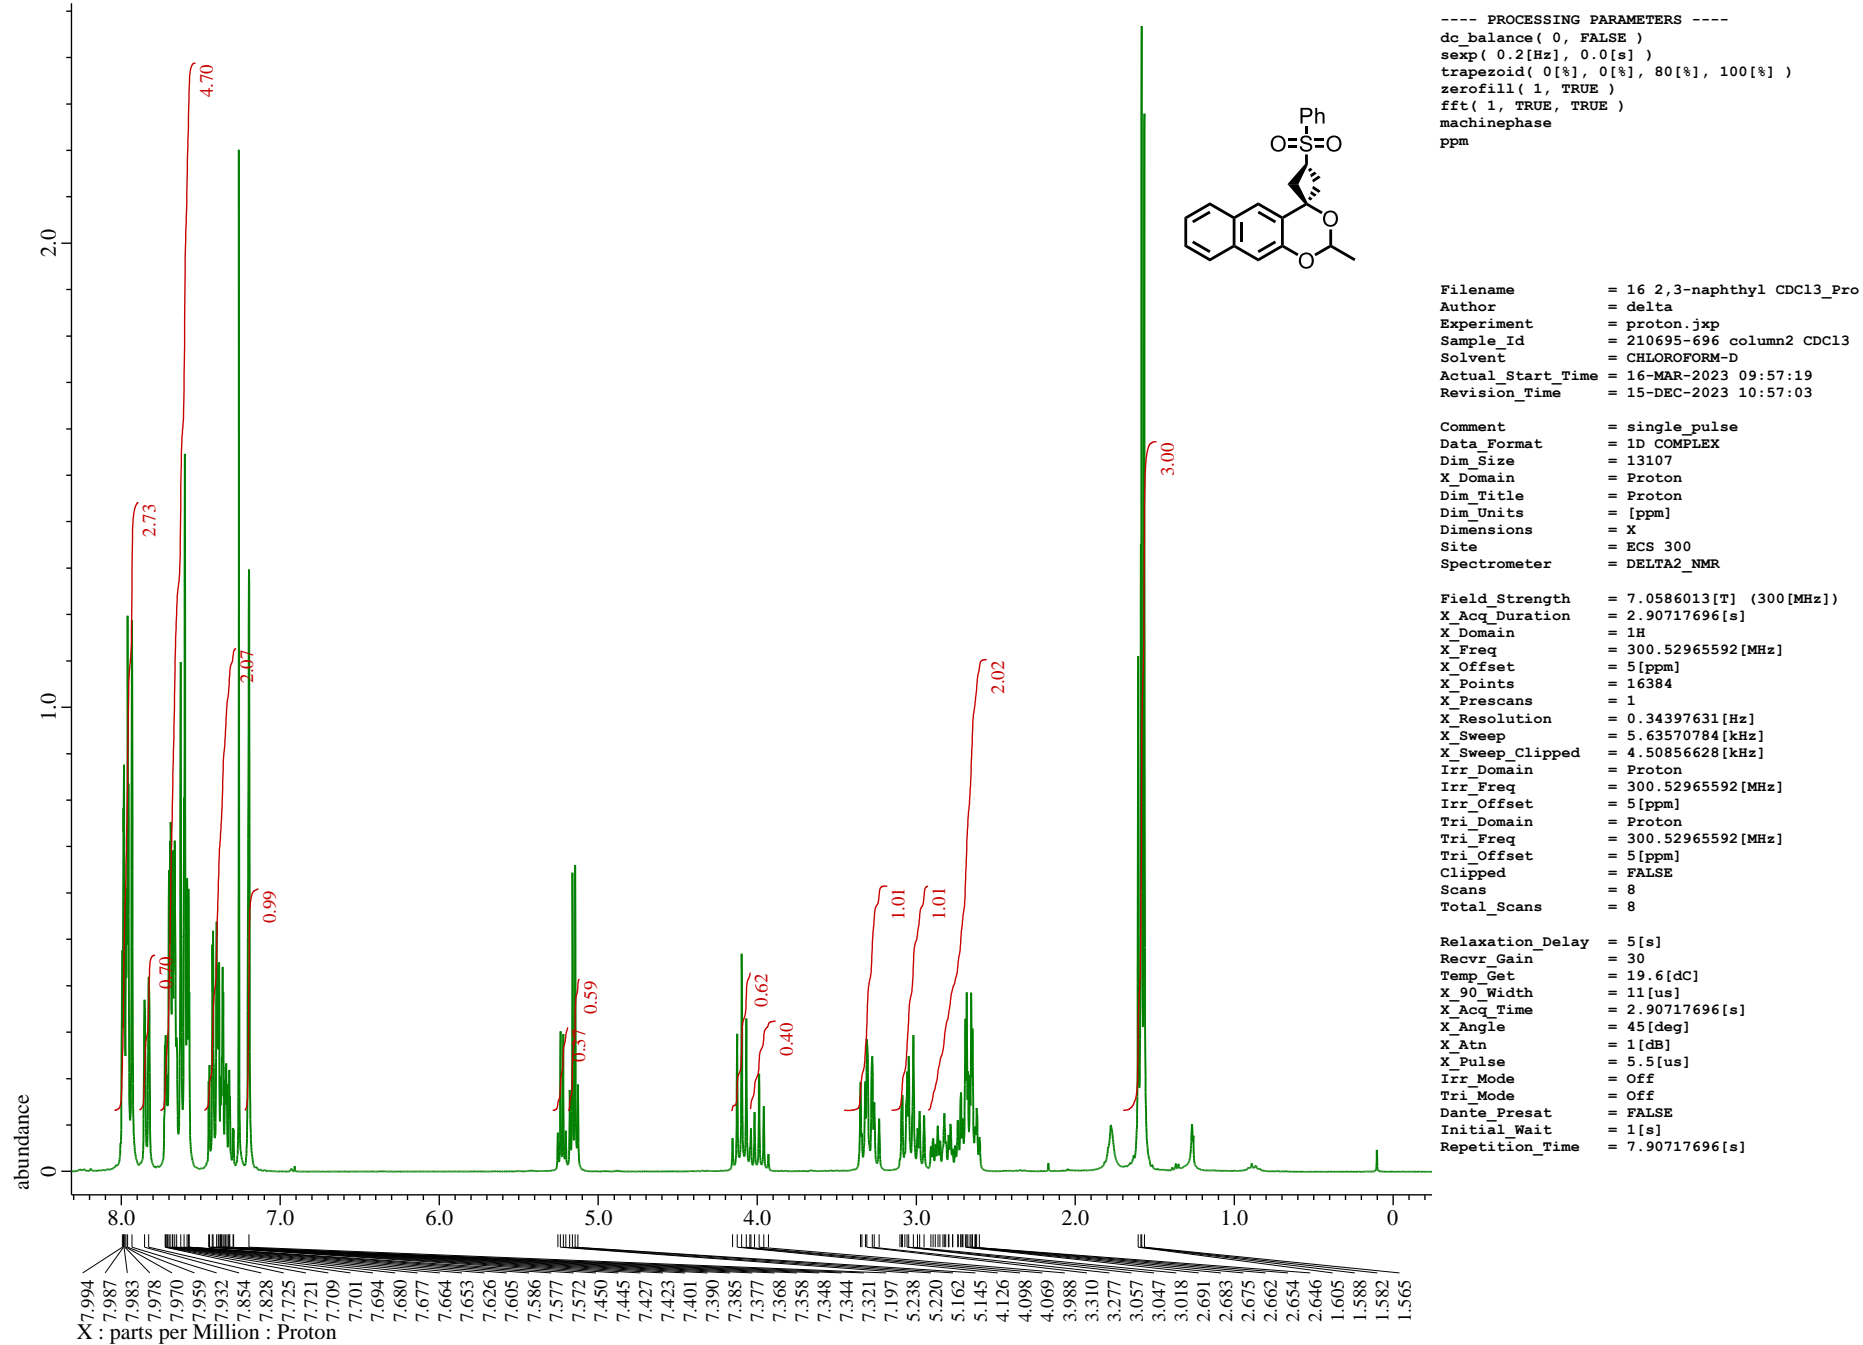

<sup>1</sup>H NMR spectrum of **2g/2g'** (300 MHz, CDCl<sub>3</sub>)

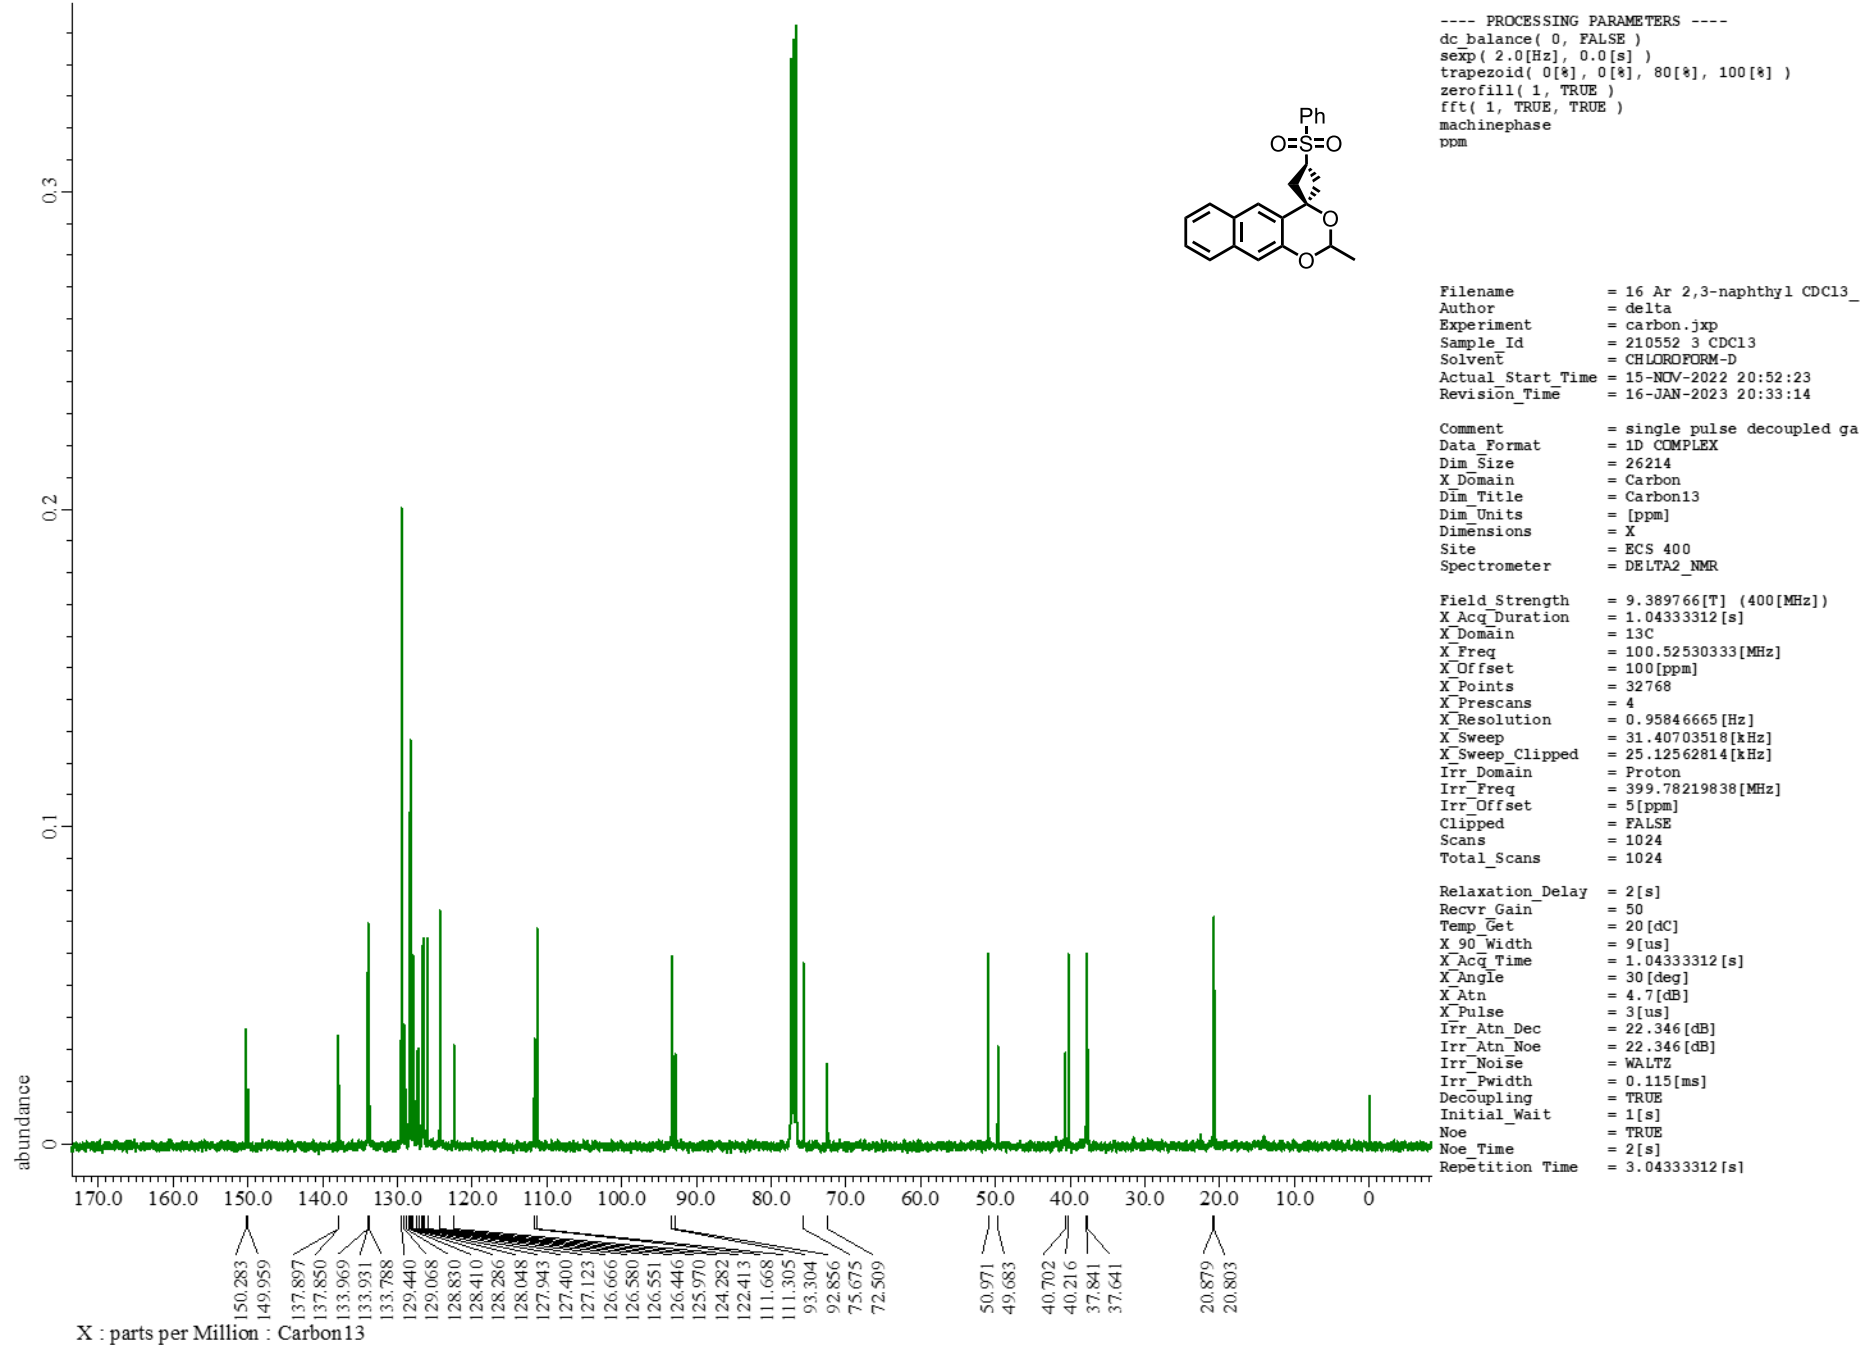

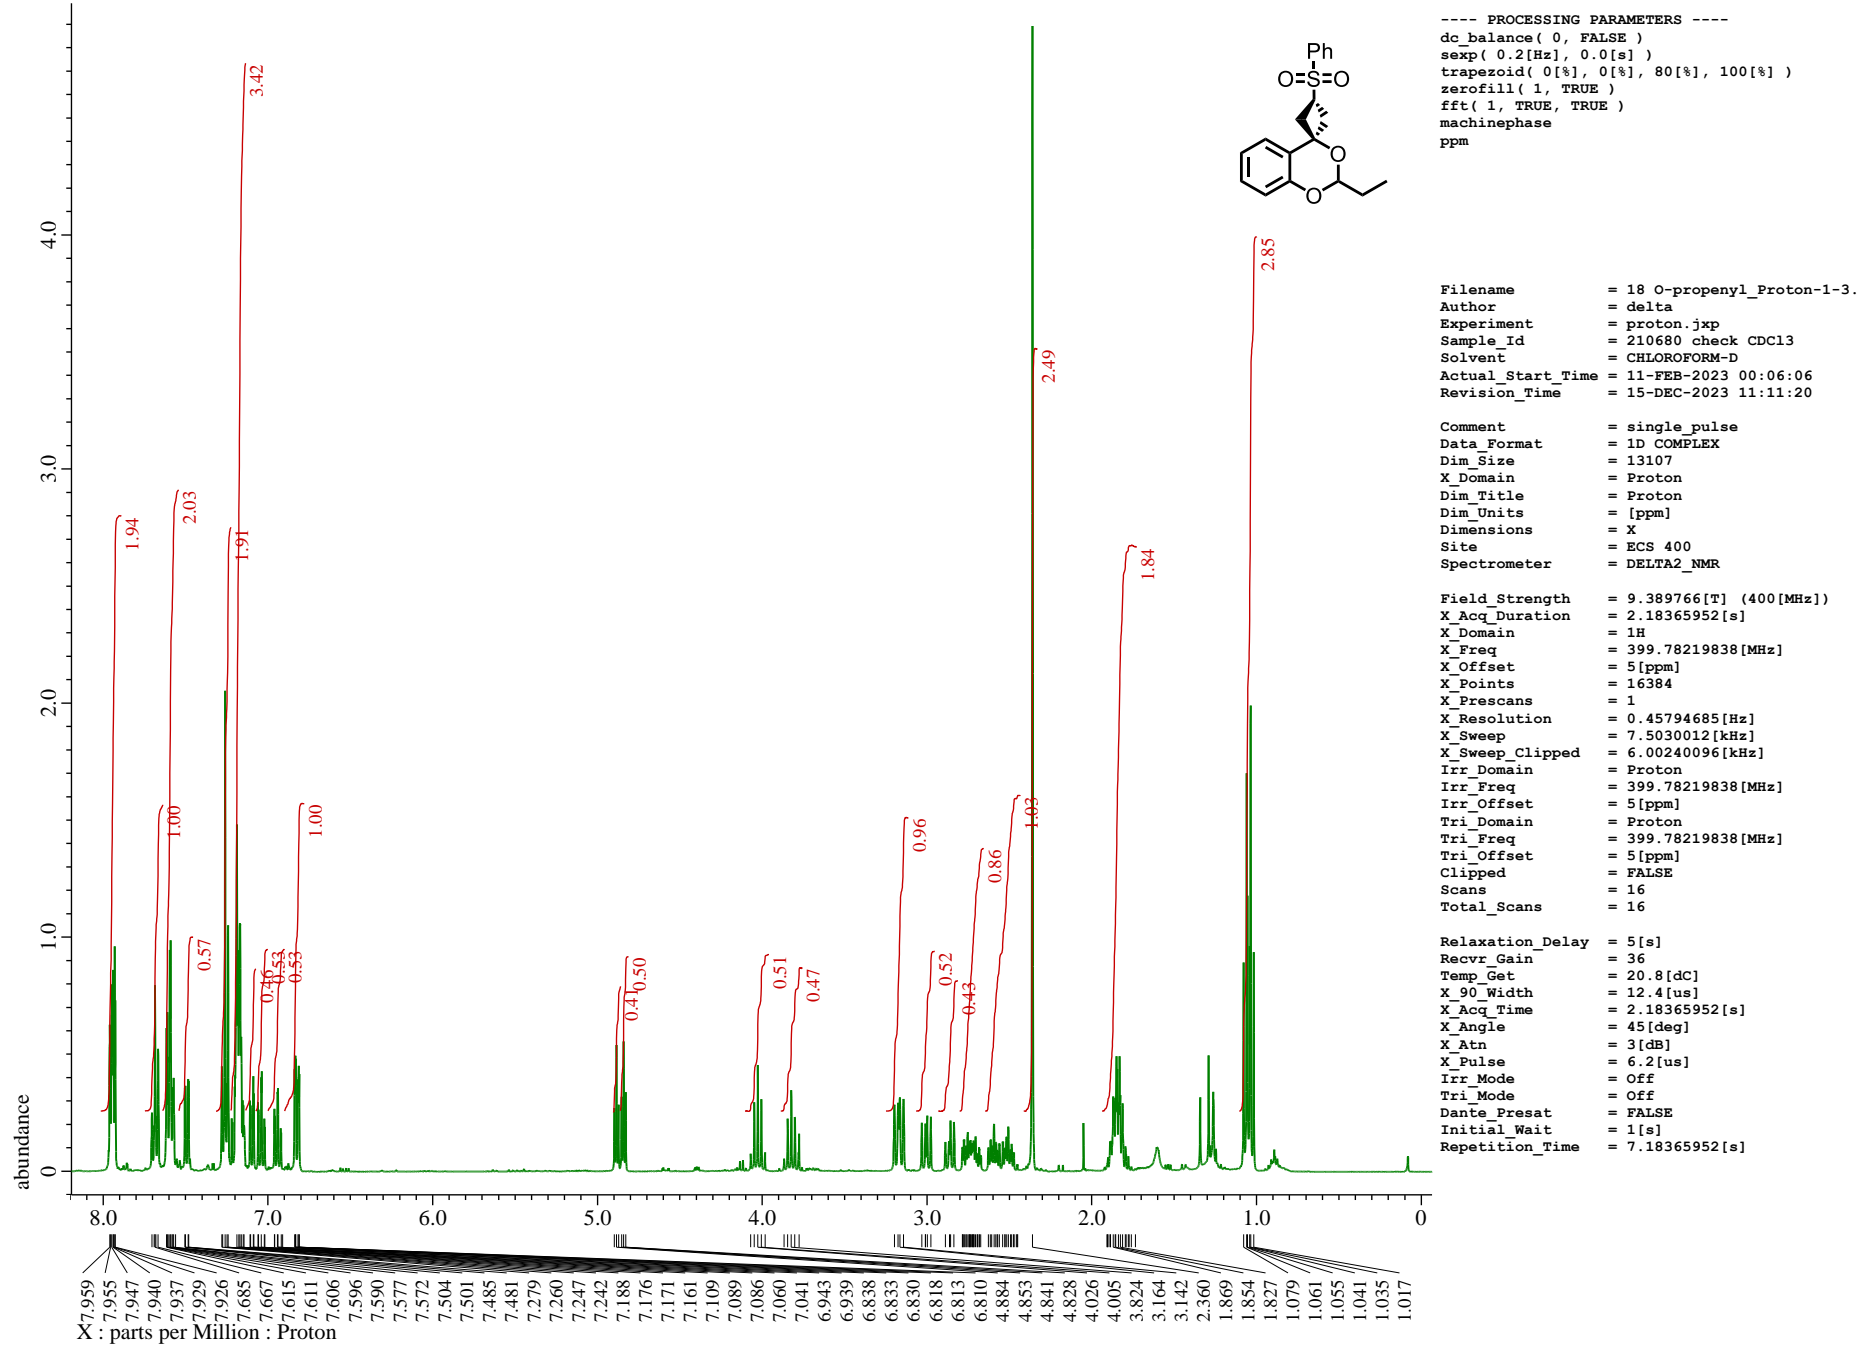

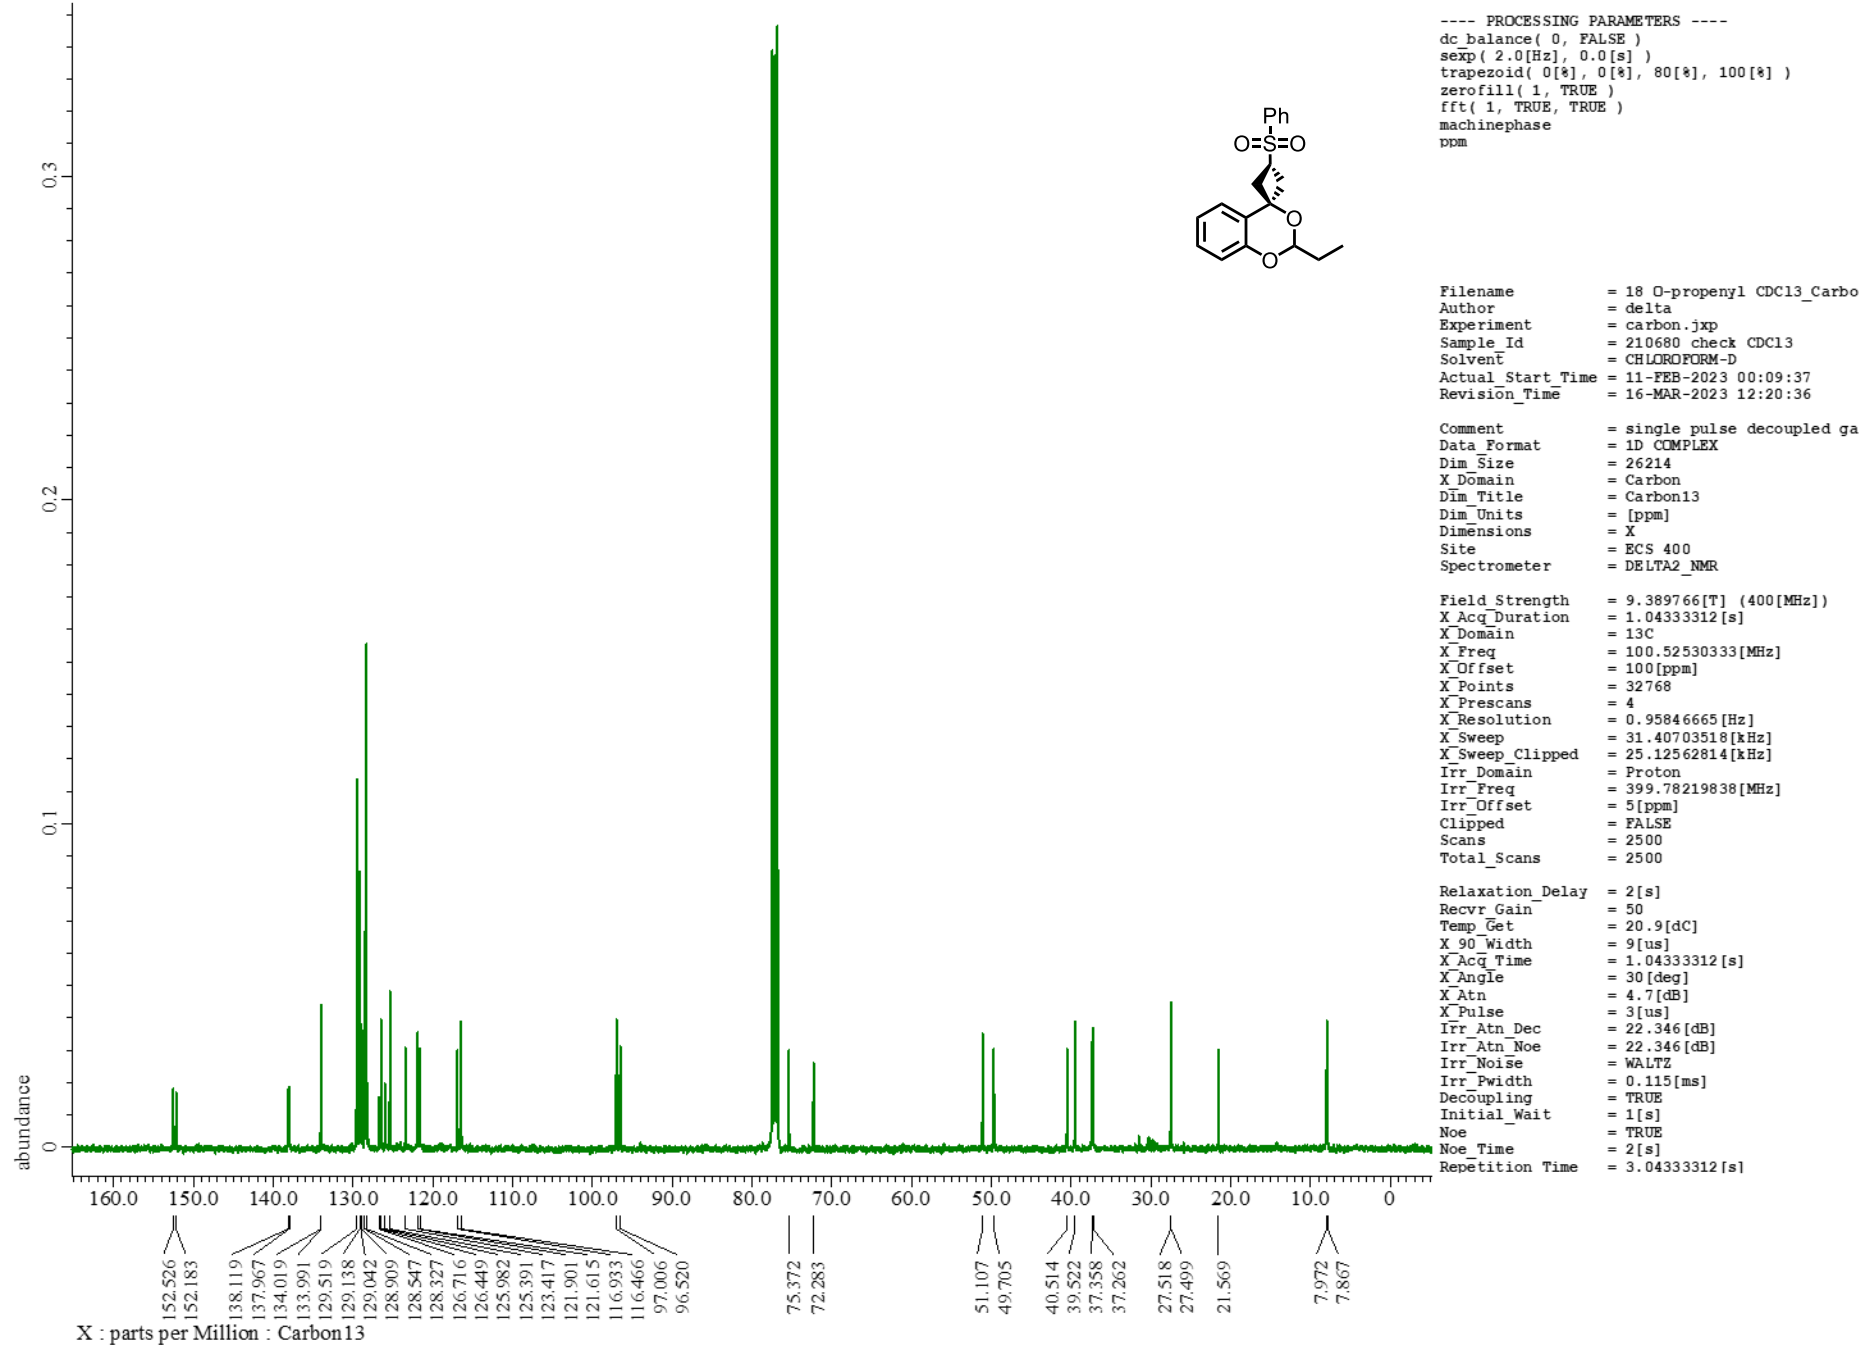

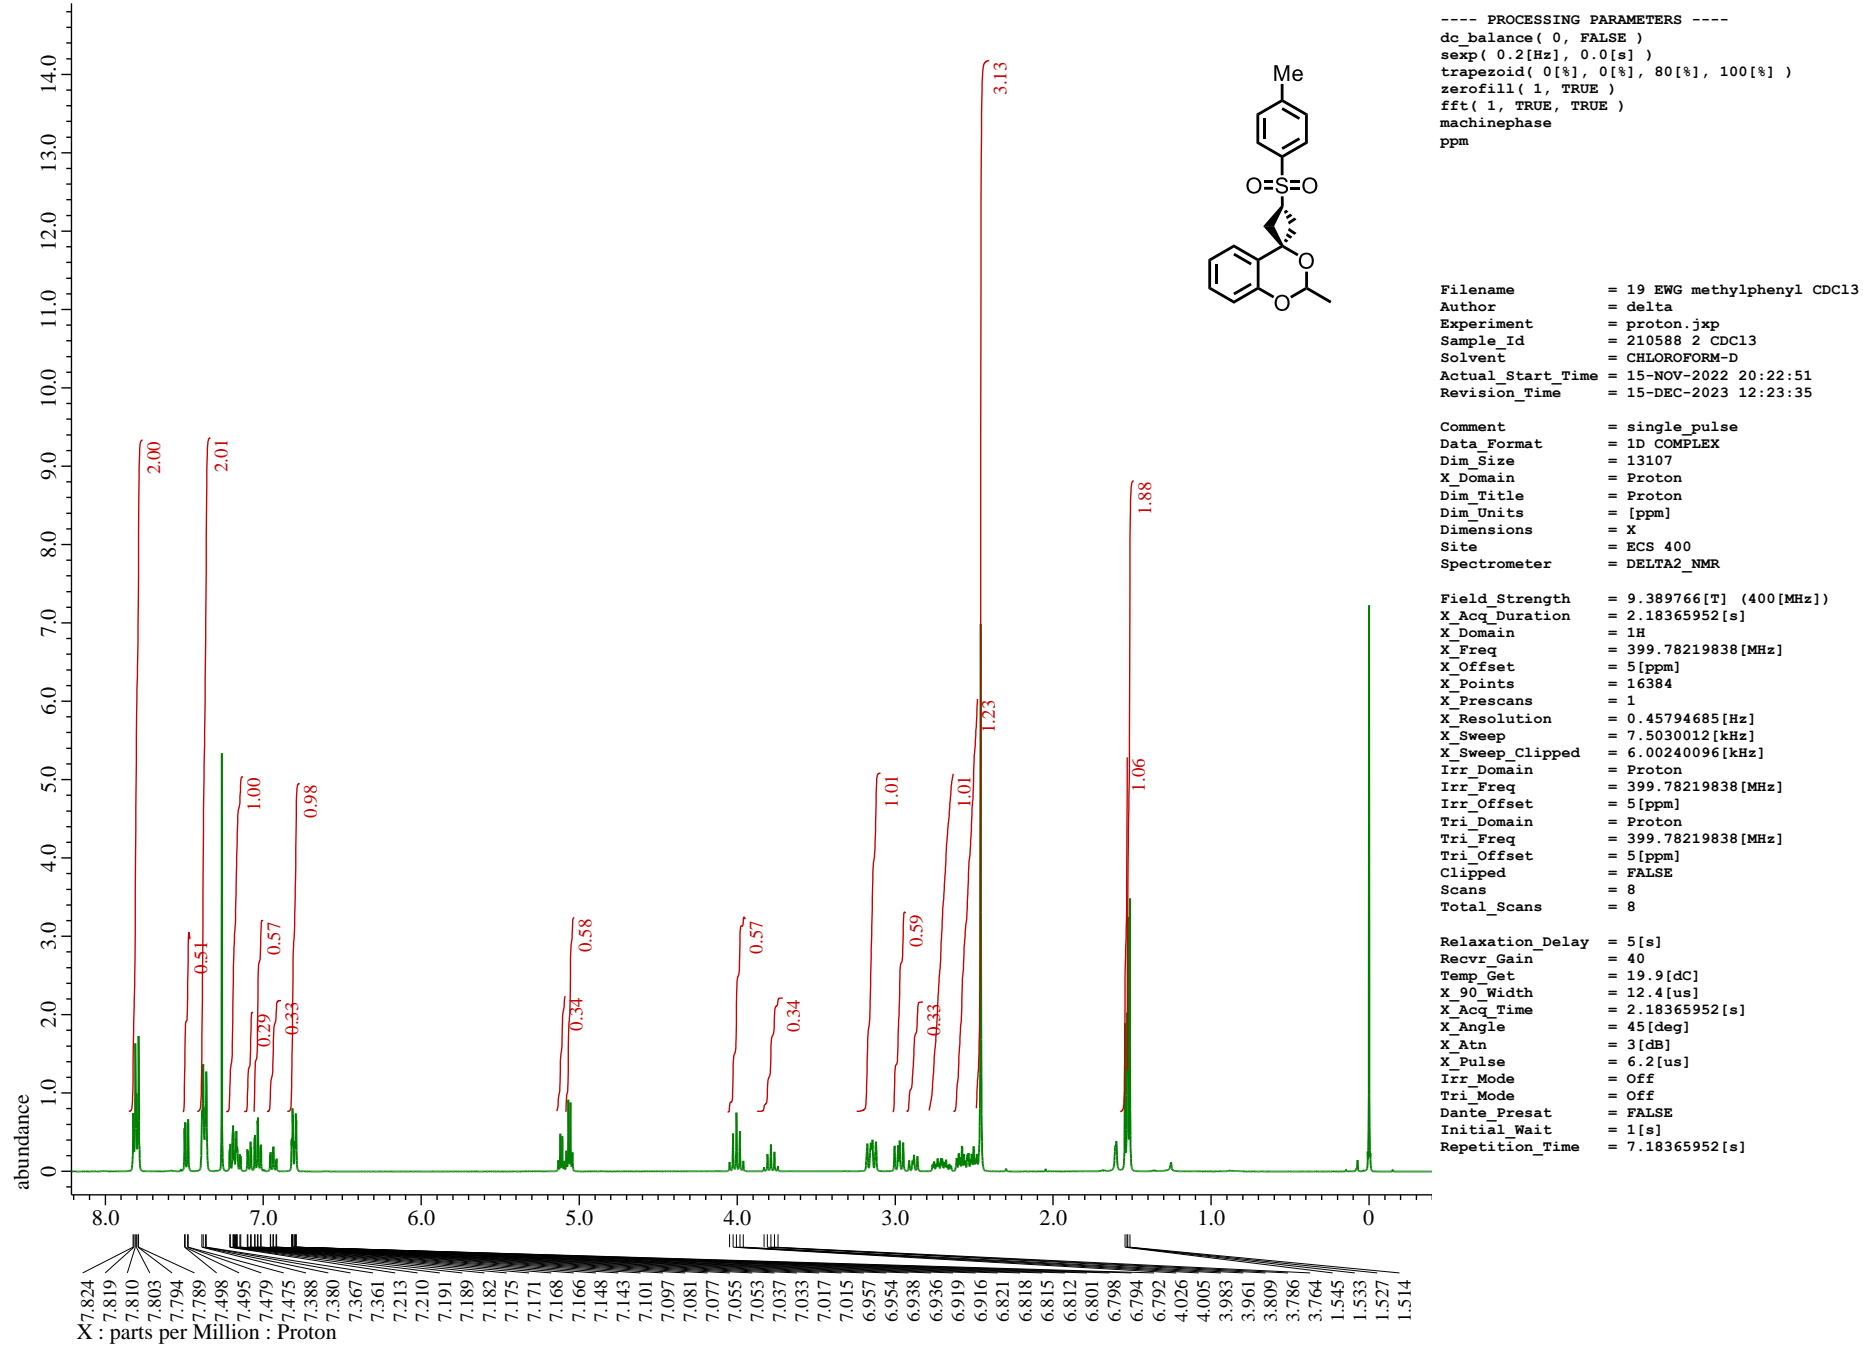

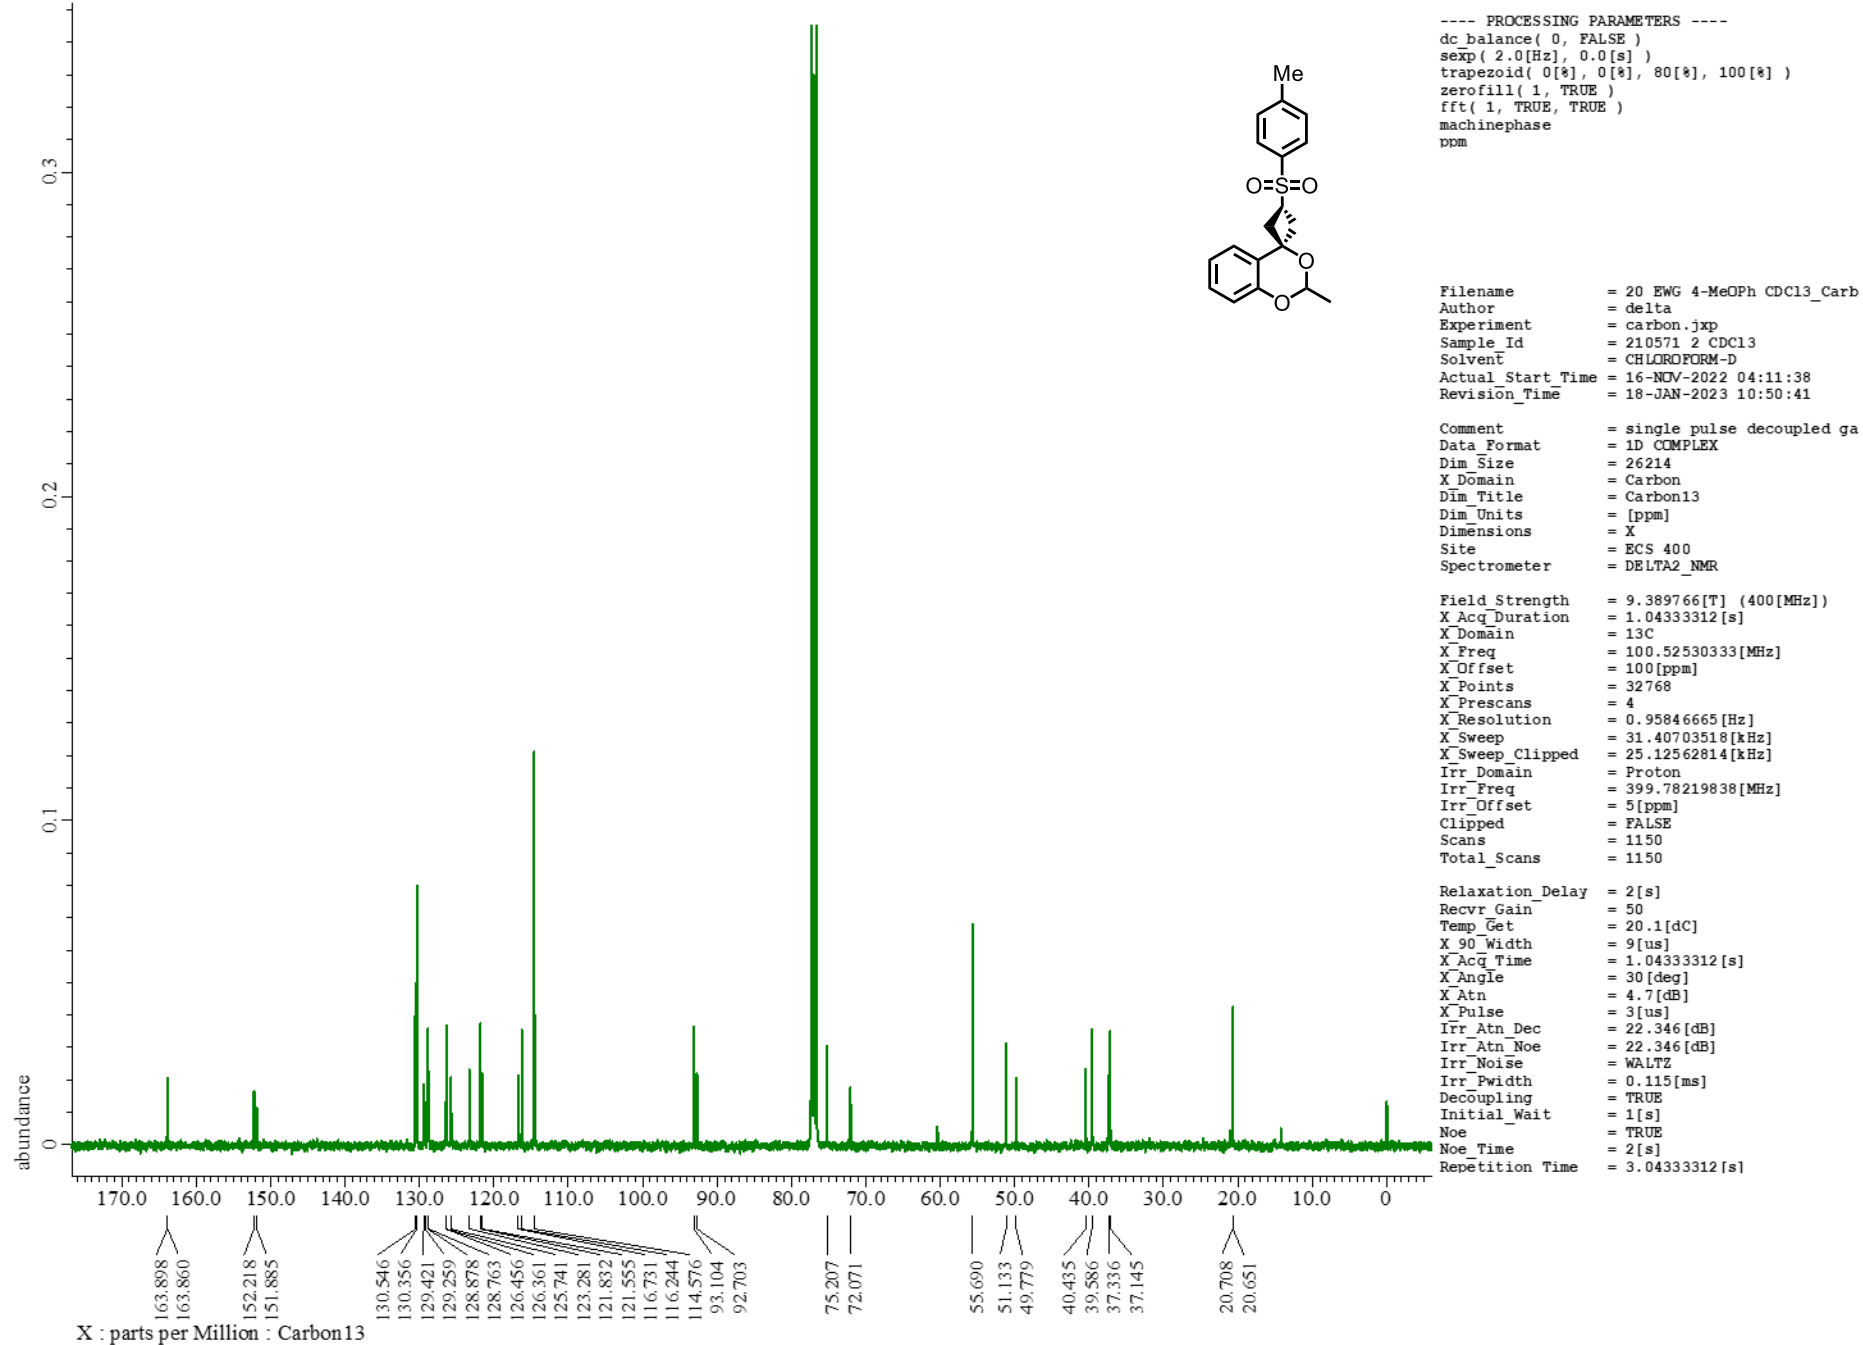



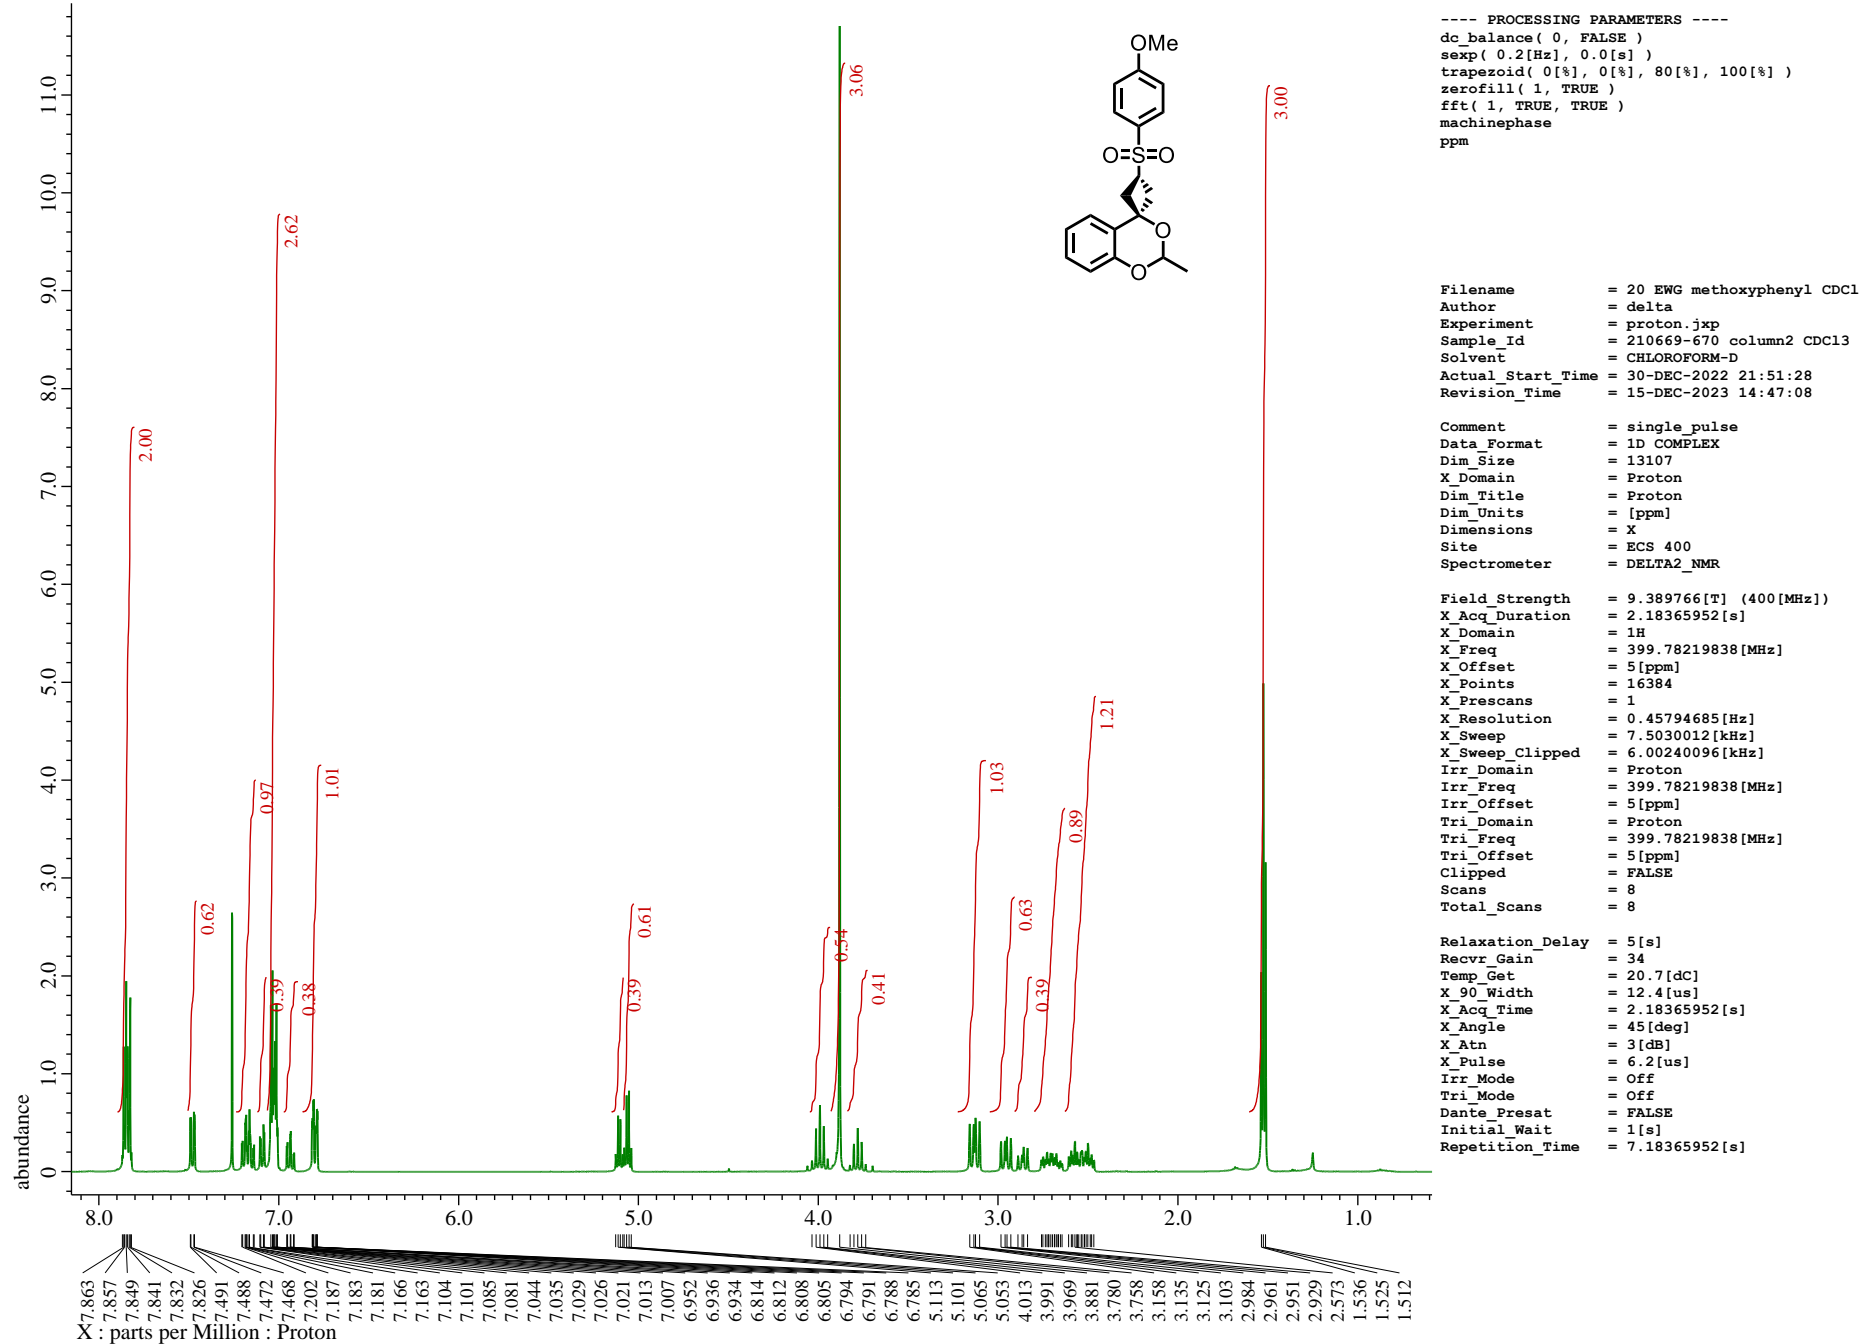

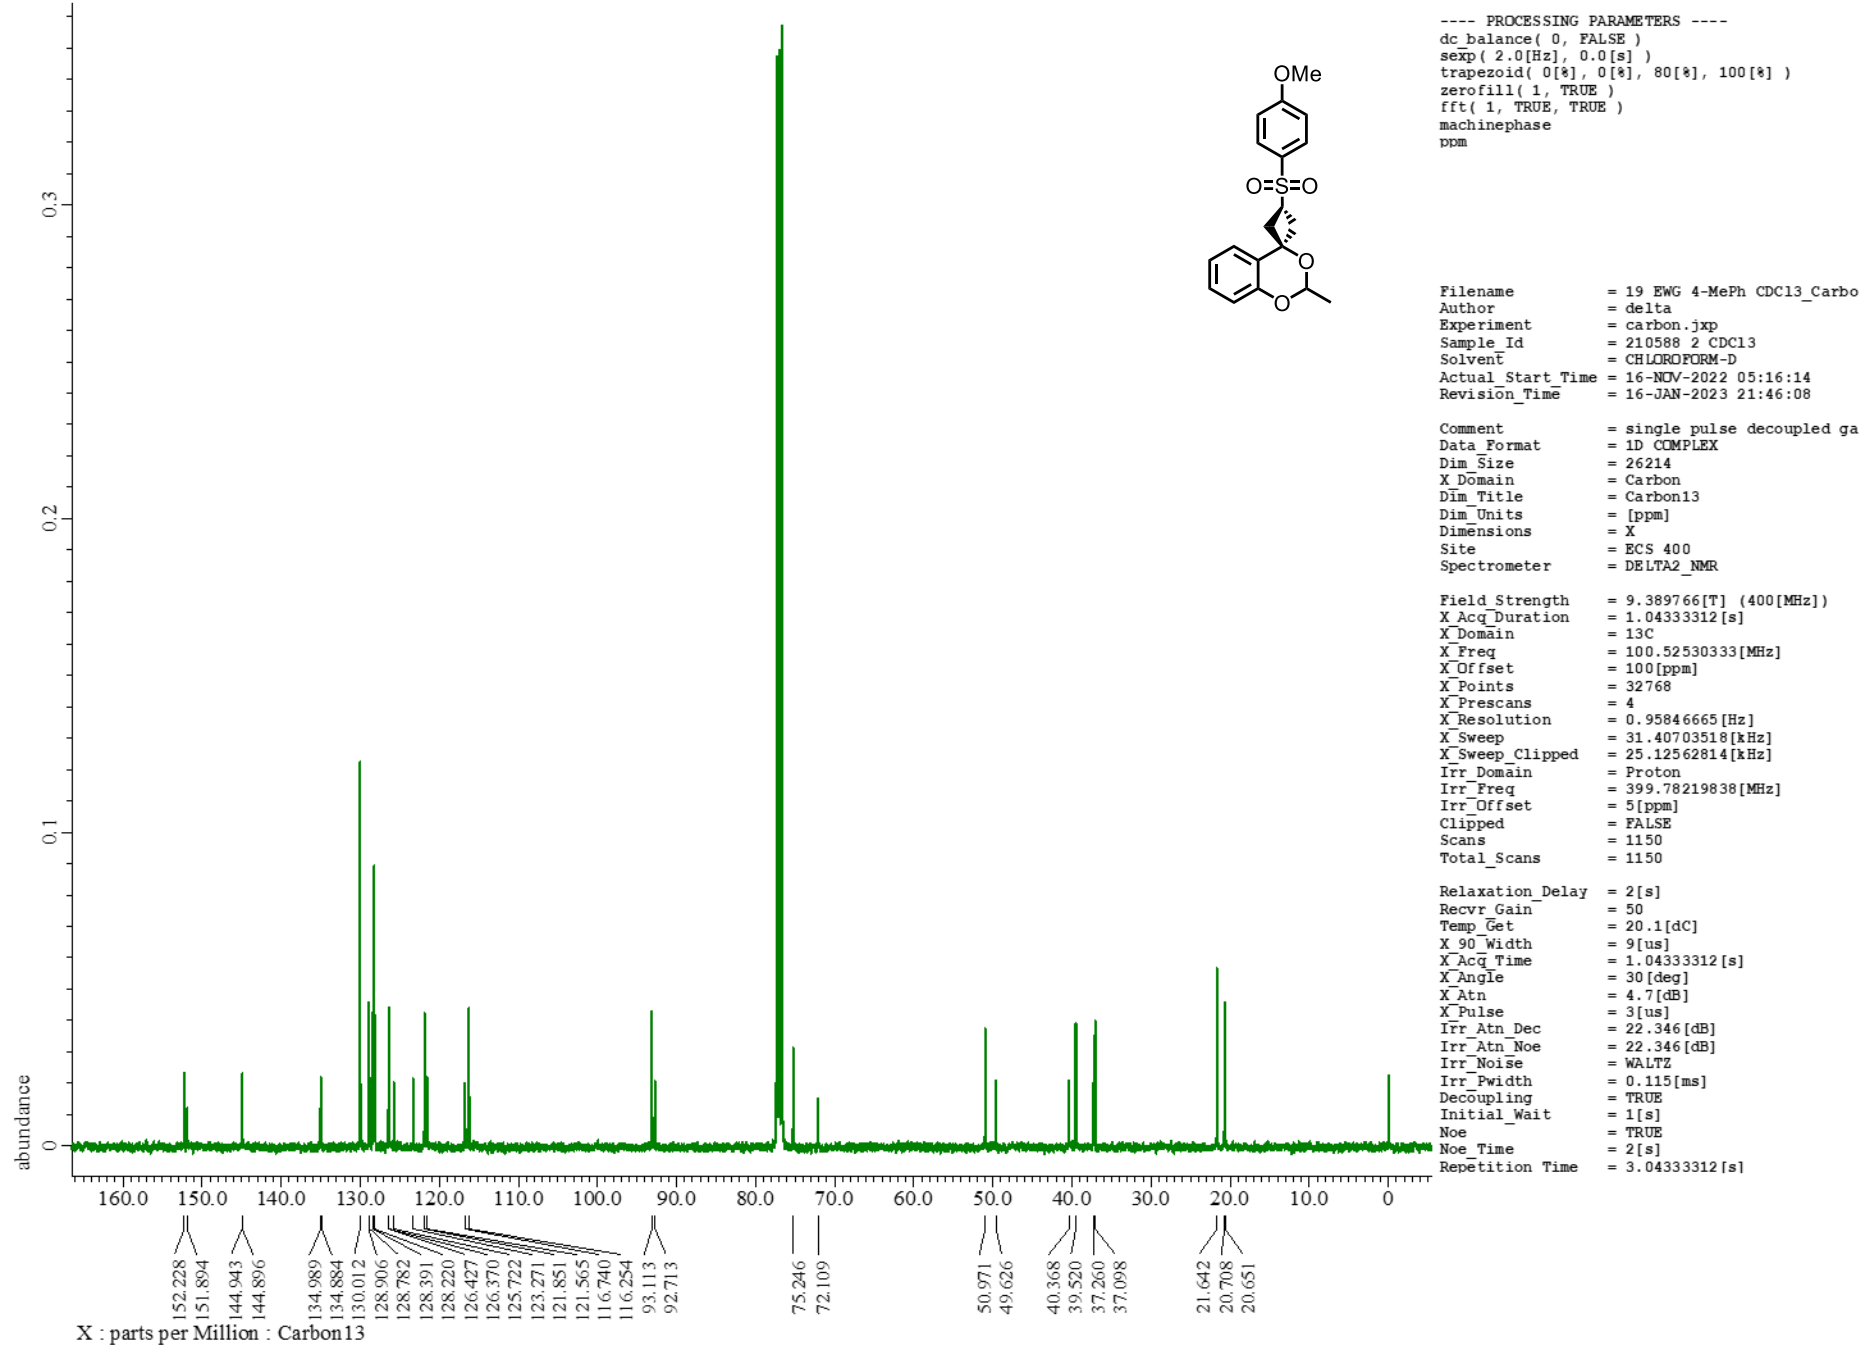

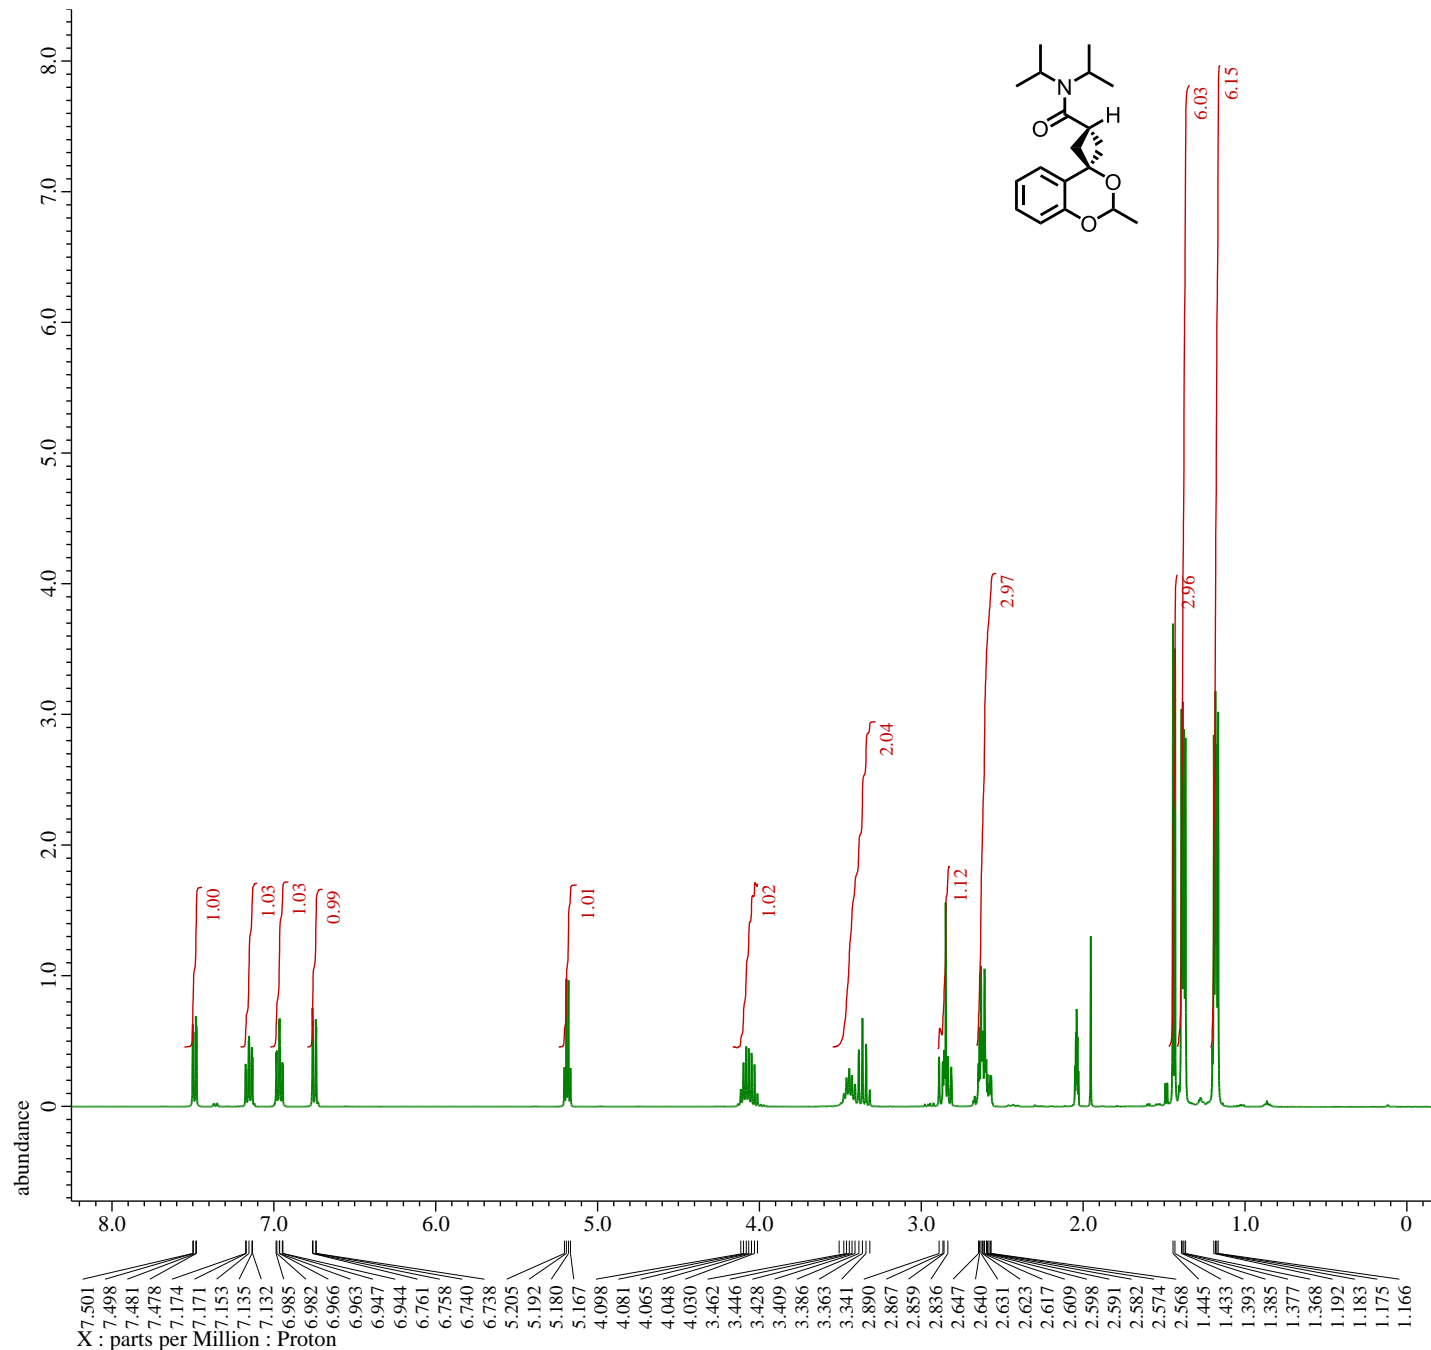

```

---- PROCESSING PARAMETERS ----
dc_balance( 0, FALSE )
sexp( 0.2[Hz], 0.0[s] )
trapezoid( 0[%], 0[%], 80[%], 100[%] )
zerofill( 1, TRUE )
fft( 1, TRUE, TRUE )
machinephase
ppm

Filename      = 210688-690 column shita A
Author       = delta
Experiment   = proton.jxp
Sample_Id    = 210688-690 column shita A
Solvent      = ACETONE-D6
Actual_Start_Time = 1-FEB-2023 11:13:23
Revision_Time   = 13-DEC-2023 16:43:51

Comment      = single_pulse
Data_Format  = 1D COMPLEX
Dim_Size     = 13107
X_Domain     = Proton
Dim_Title    = Proton
Dim_Units    = [ppm]
Dimensions   = X
Site         = ECS 400
Spectrometer = DELTA2_NMR

Field_Strength = 9.389766[T] (400[MHz])
X_Acq_Duration = 2.18365952[s]
X_Domain       = 1H
X_Freq        = 399.78219838[MHz]
X_Offset      = 5[ppm]
X_Points      = 16384
X_Prescans    = 1
X_Resolution  = 0.45794685[Hz]
X_Sweep       = 7.5030012[kHz]
X_Sweep_Clippped = 6.00240096[kHz]
Irr_Domain    = Proton
Irr_Freq      = 399.78219838[MHz]
Irr_Offset    = 5[ppm]
Tri_Domain    = Proton
Tri_Freq      = 399.78219838[MHz]
Tri_Offset    = 5[ppm]
Clipped       = FALSE
Scans         = 8
Total_Scans   = 8

Relaxation_Delay = 5[s]
Recvr_Gain       = 30
Temp_Get         = 19.9[dC]
X_90_Width      = 12.4[us]
X_Acq_Time      = 2.18365952[s]
X_Angle         = 45[deg]
X_Atn           = 3[dB]
X_Pulse         = 6.2[us]
Irr_Mode        = Off
Tri_Mode        = Off
Dante_Presat    = FALSE
Initial_Wait    = 1[s]
Repetition_Time = 7.18365952[s]

```

<sup>1</sup>H NMR spectrum of **2k** (400 MHz, Acetone-*d*<sub>6</sub>)

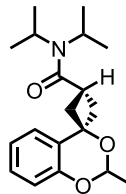

```

---- PROCESSING PARAMETERS ----
dc_balance( 0, FALSE )
sexp( 2.0[Hz], 0.0[s] )
trapezoid( 0[%], 0[%], 80[%], 100[%] )
zerofill( 1, TRUE )
fft( 1, TRUE, TRUE )
machinephase
ppm

Filename      = 210688-690 column shita A
Author       = delta
Experiment   = carbon.jxp
Sample_Id    = 210688-690 column shita A
Solvent      = ACETONE-D6
Actual_Start_Time = 3-FEB-2023 02:17:34
Revision_Time  = 13-DEC-2023 15:49:44

Comment      = single pulse decoupled ga
Data_Format  = 1D COMPLEX
Dim_Size     = 26214
X_Domain     = Carbon
Dim_Title    = Carbon13
Dim_Units    = [ppm]
Dimensions   = X
Site         = JNM-ECA500
Spectrometer = DELTA2_NMR

Field_Strength = 11.7473579[T] (500[MHz])
X_Acq_Duration = 0.83361792[s]
X_Domain       = 13C
X_Freq        = 125.76529768[MHz]
X_Offset      = 100[ppm]
X_Points      = 32768
X_Prescans    = 4
X_Resolution  = 1.19959034[Hz]
X_Sweep       = 39.3081761[kHz]
X_Sweep_Clipped = 31.44654088[kHz]
Irr_Domain    = Proton
Irr_Freq     = 500.15991521[MHz]
Irr_Offset    = 5.0[ppm]
Clipped      = TRUE
Scans        = 3259
Total_Scans  = 3259

Relaxation_Delay = 2[s]
Recvr_Gain       = 50
Temp_Get        = 21.2[dC]
X_90_Width     = 9.8[us]
X_Acq_Time     = 0.83361792[s]
X_Angle        = 30[deg]
X_Atn          = 4.1[dB]
X_Pulse        = 3.26666667[us]
Irr_Atn_Dec    = 21.078[dB]
Irr_Atn_No     = 20.664[dB]
Irr_Noise     = WALTZ
Irr_Pwidth    = 92[us]
Decoupling     = TRUE
Initial_Wait   = 1[s]
Noe            = TRUE
Noe_Time       = 2[s]
Repetition_Time = 2.83361792[s]

```

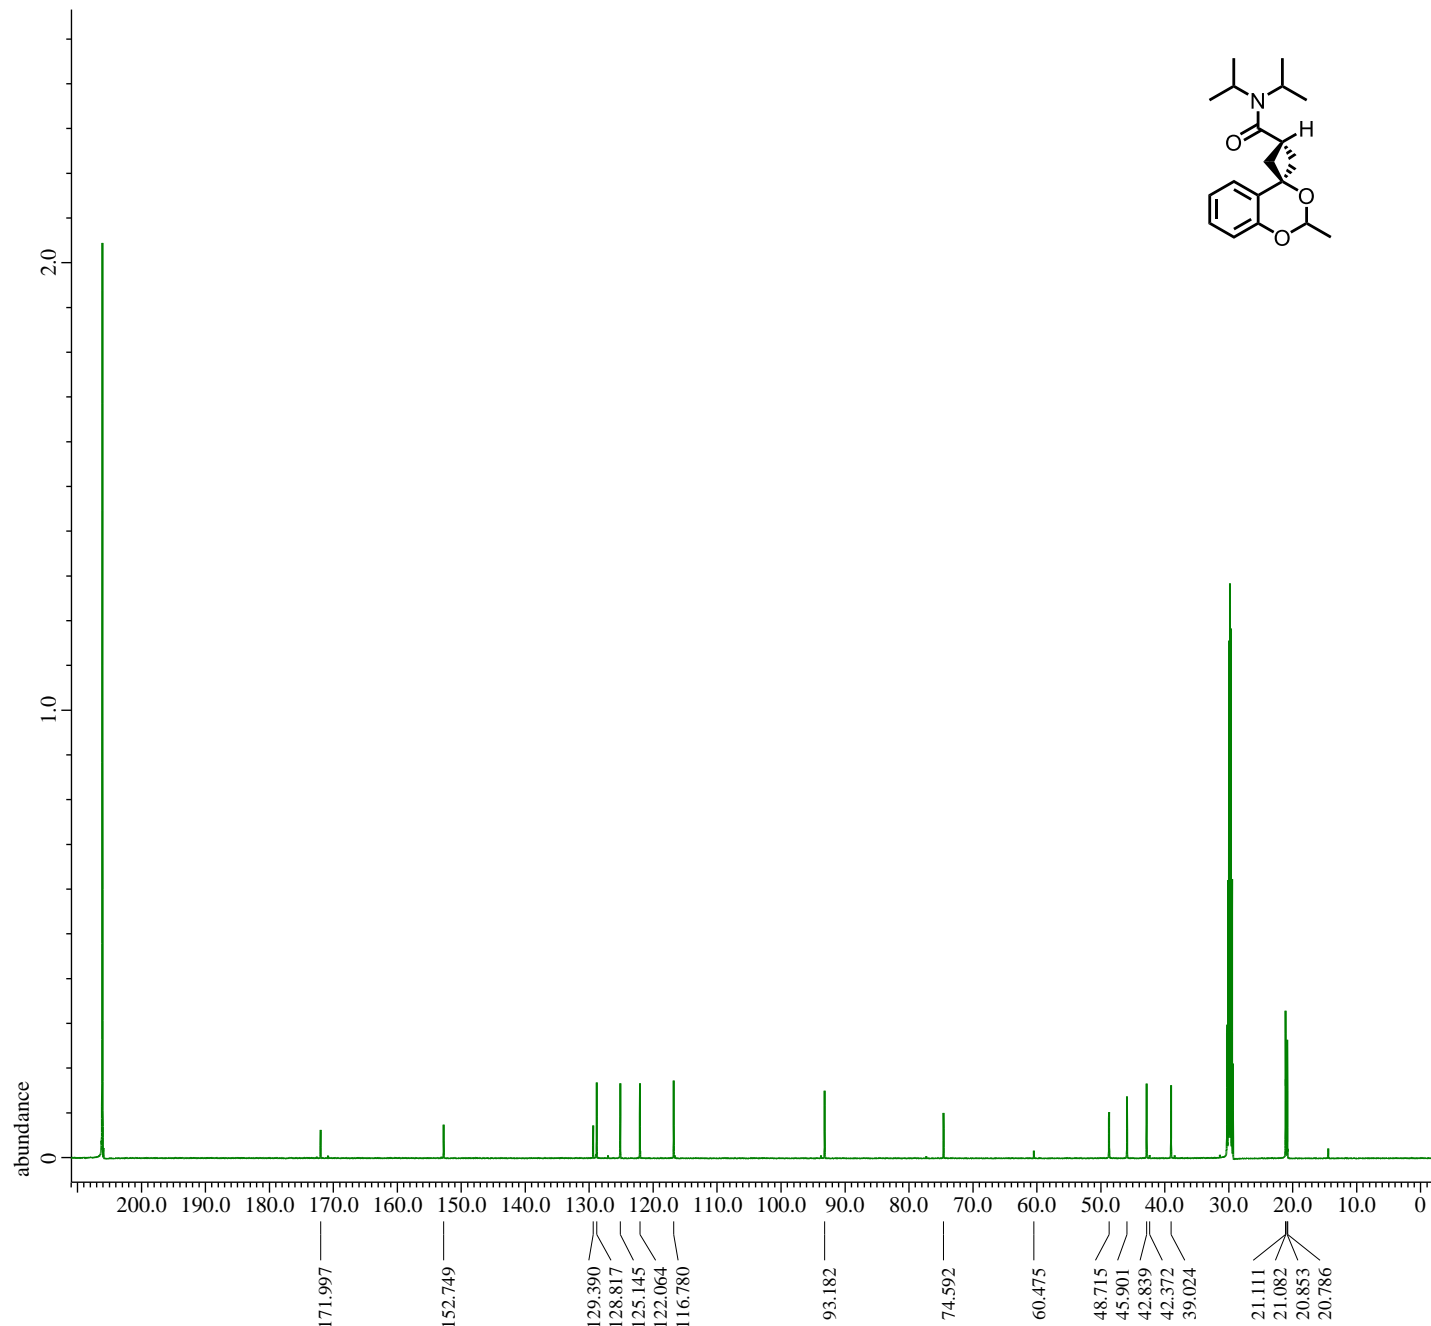

X : parts per Million : Carbon13

<sup>13</sup>C NMR spectrum of **2k** (126 MHz, Acetone-*d*<sub>6</sub>)

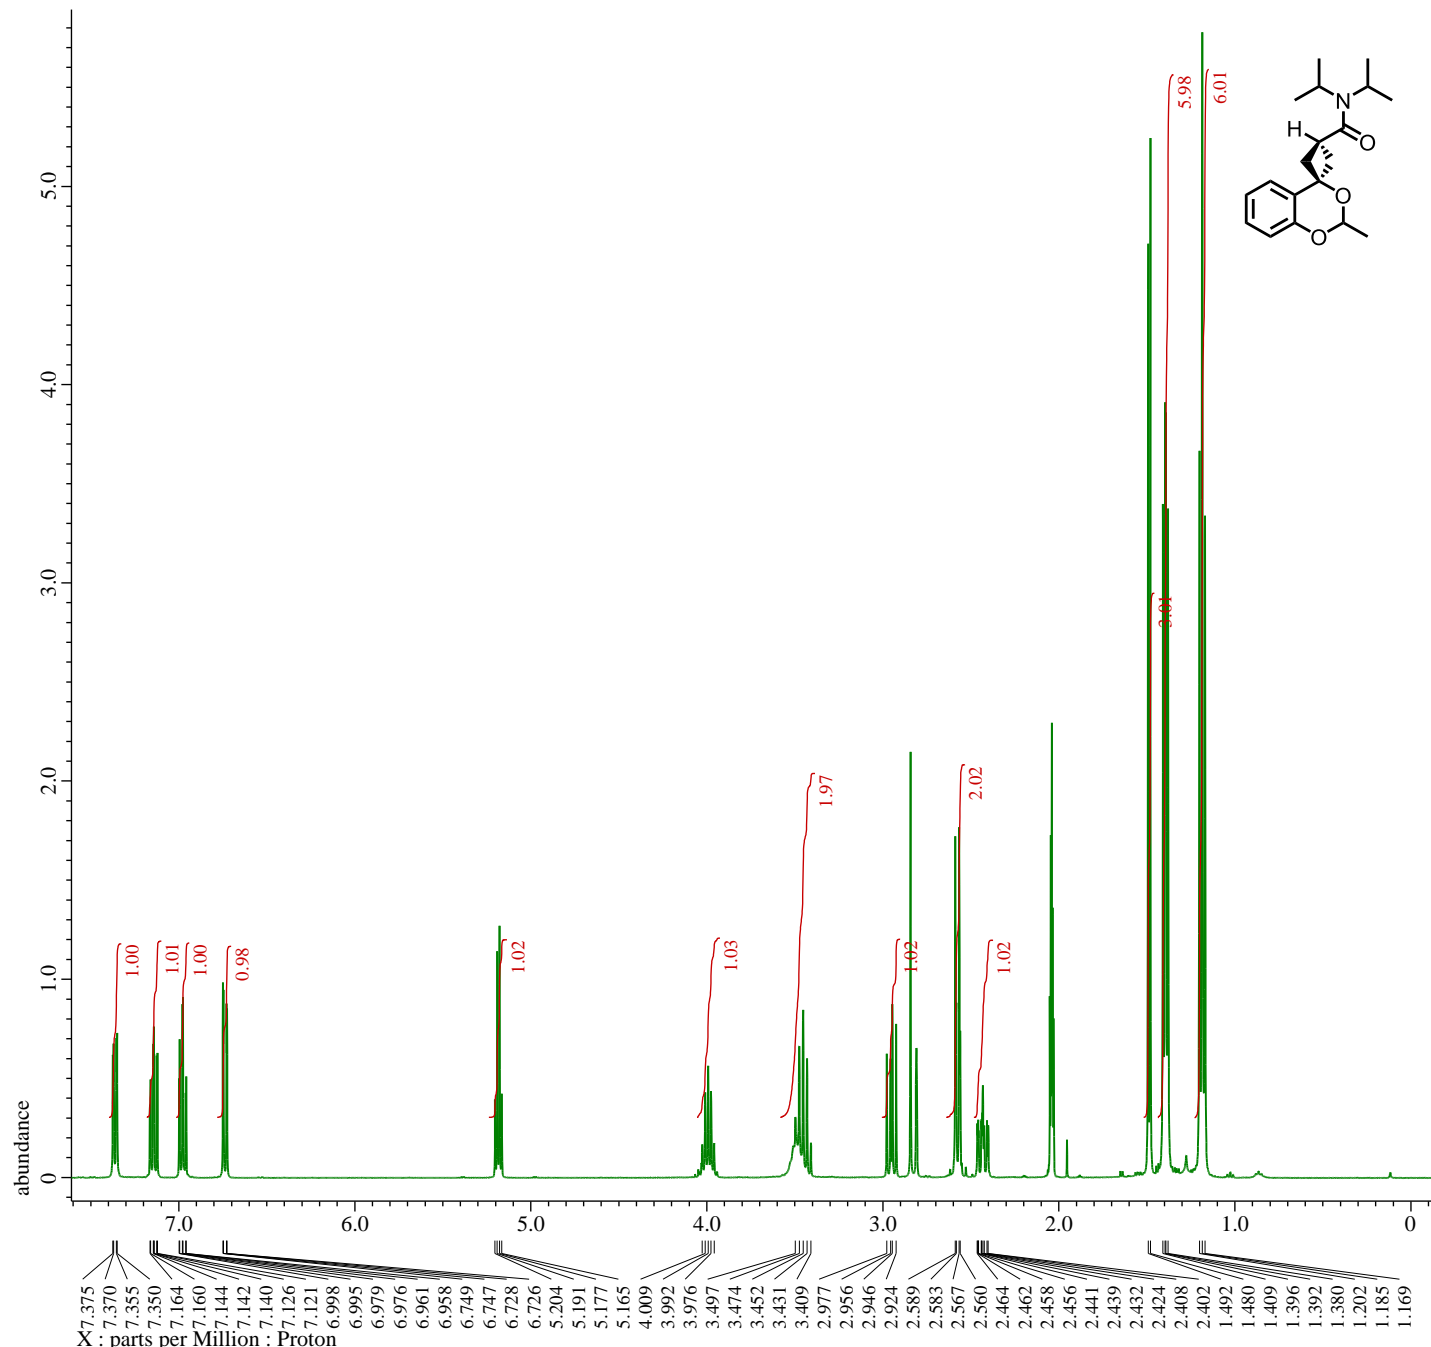

```

---- PROCESSING PARAMETERS ----
dc_balance( 0, FALSE )
sexf( 0.2[Hz], 0.0[s] )
trapezoid( 0[%], 0[%], 80[%], 100[%] )
zerofill( 1, TRUE )
fft( 1, TRUE, TRUE )
machinephase
ppm

Filename      = 210688-690 column ue Acet
Author        = delta
Experiment    = proton.jxp
Sample_Id     = 210688-690 column ue Acet
Solvent       = ACETONE-D6
Actual_Start_Time = 1-FEB-2023 11:07:17
Revision_Time  = 13-DEC-2023 16:32:51

Comment       = single_pulse
Data_Format   = 1D COMPLEX
Dim_Size      = 13107
X_Domain      = Proton
Dim_Title     = Proton
Dim_Units     = [ppm]
Dimensions    = X
Site          = ECS 400
Spectrometer  = DELTA2_NMR

Field_Strength = 9.389766[T] (400[MHz])
X_Acq_Duration = 2.18365952[s]
X_Domain       = 1H
X_Freq        = 399.78219838[MHz]
X_Offset      = 5[ppm]
X_Points      = 16384
X_Prescans    = 1
X_Resolution  = 0.45794685[Hz]
X_Sweep       = 7.5030012[kHz]
X_Sweep_Clippped = 6.00240096[kHz]
Irr_Domain    = Proton
Irr_Freq      = 399.78219838[MHz]
Irr_Offset    = 5[ppm]
Tri_Domain    = Proton
Tri_Freq      = 399.78219838[MHz]
Tri_Offset    = 5[ppm]
Clipped       = FALSE
Scans         = 8
Total_Scans   = 8

Relaxation_Delay = 5[s]
Recvr_Gain       = 38
Temp_Get         = 20.2[dC]
X_90_Width      = 12.4[us]
X_Acq_Time      = 2.18365952[s]
X_Angle         = 45[deg]
X_Atn           = 3[dB]
X_Pulse         = 6.2[us]
Irr_Mode        = Off
Tri_Mode        = Off
Dante_Preset    = FALSE
Initial_Wait    = 1[s]
Repetition_Time = 7.18365952[s]

```

<sup>1</sup>H NMR spectrum of **2k'** (400 MHz, Acetone-d<sub>6</sub>)

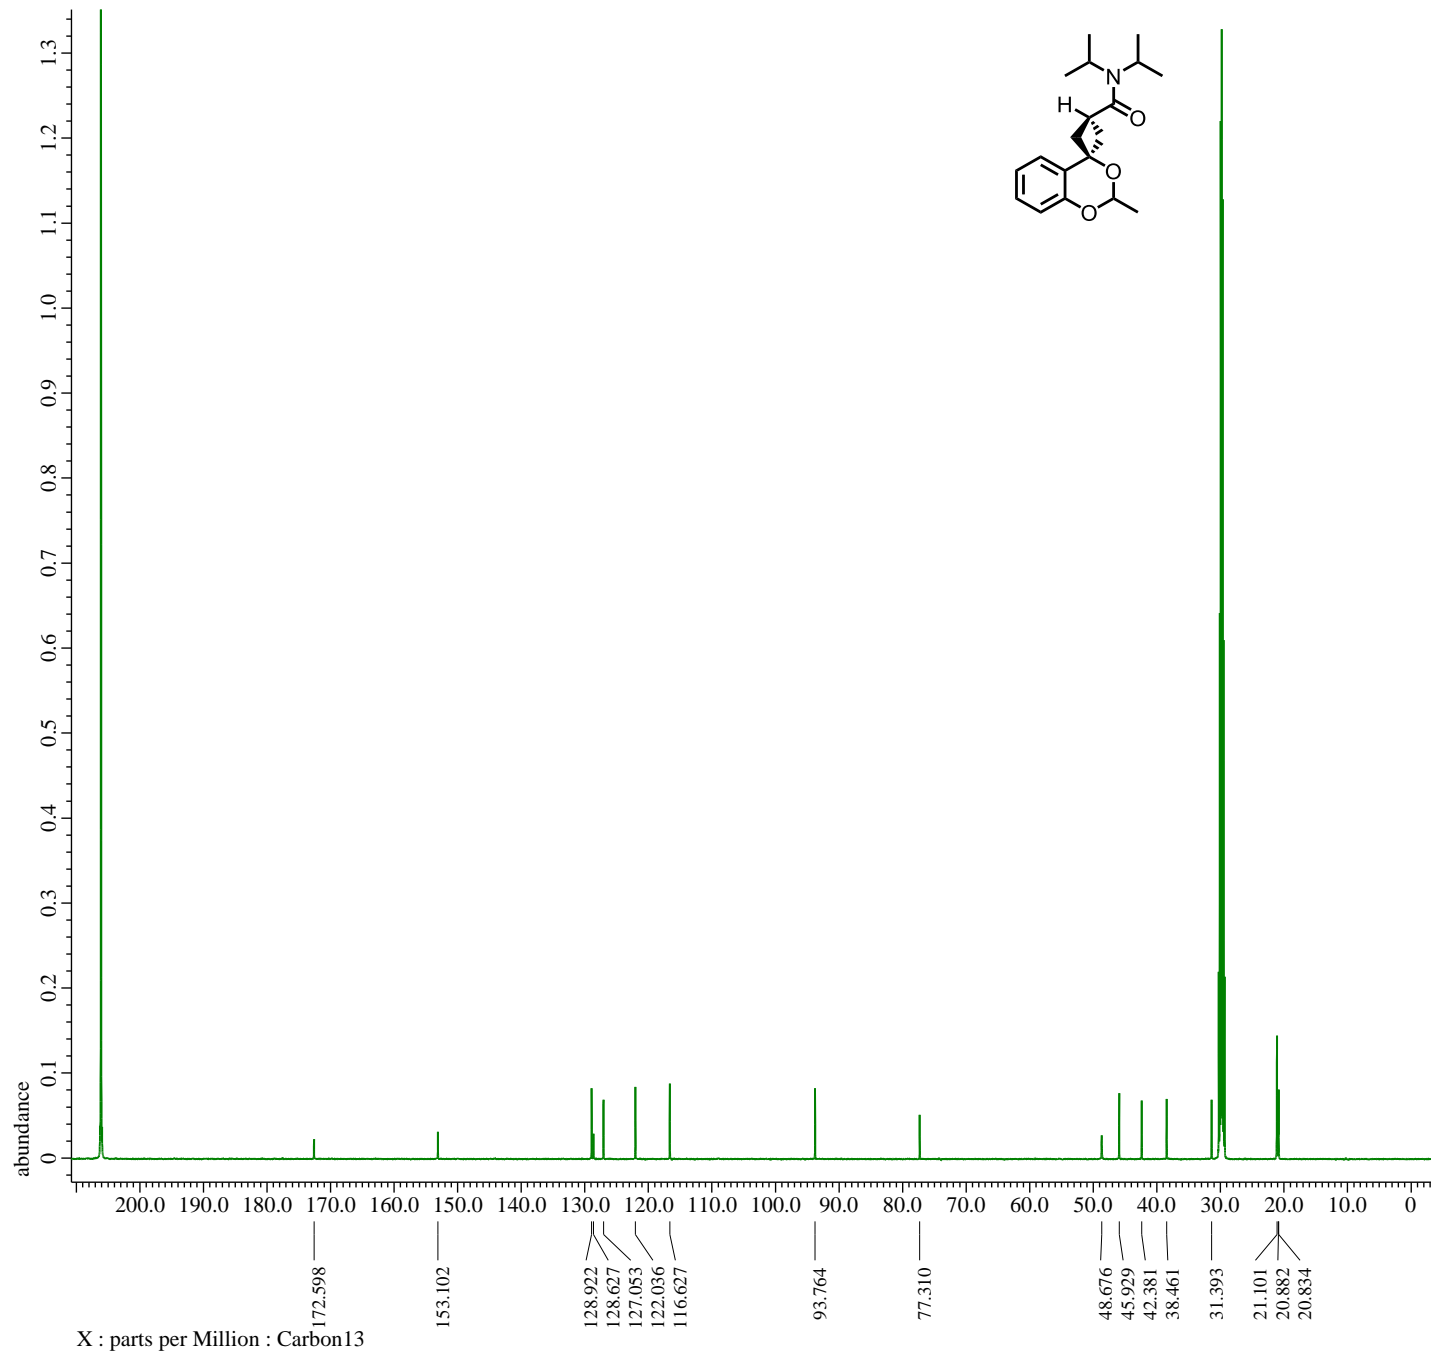

```

---- PROCESSING PARAMETERS ----
dc_balance( 0, FALSE )
sexp( 2.0[Hz], 0.0[s] )
trapezoid( 0[%], 0[%], 80[%], 100[%] )
zerofill( 1, TRUE )
fft( 1, TRUE, TRUE )
machinephase
ppm

Filename      = 210688-690 column ue Acet
Author       = delta
Experiment   = carbon.jxp
Sample_Id    = 210688-690 column ue Acet
Solvent      = ACETONE-D6
Actual_Start_Time = 3-FEB-2023 04:58:27
Revision_Time   = 13-DEC-2023 15:37:25

Comment      = single pulse decoupled ga
Data_Format  = 1D COMPLEX
Dim_Size     = 26214
X_Domain     = Carbon
Dim_Title    = Carbon13
Dim_Units    = [ppm]
Dimensions   = X
Site         = JNM-ECA500
Spectrometer = DELTA2_NMR

Field_Strength = 11.7473579[T] (500[MHz])
X_Acq_Duration = 0.83361792[s]
X_Domain       = 13C
X_Freq         = 125.76529768[MHz]
X_Offset       = 100[ppm]
X_Points       = 32768
X_Prescans     = 4
X_Resolution   = 1.19959034[Hz]
X_Sweep        = 39.3081761[kHz]
X_Sweep_Clipped = 31.44654088[kHz]
Irr_Domain     = Proton
Irr_Freq       = 500.15991521[MHz]
Irr_Offset     = 5.0[ppm]
Clipped        = FALSE
Scans          = 3500
Total_Scans    = 3500

Relaxation_Delay = 2[s]
Recvr_Gain       = 50
Temp_Get         = 20.6[dC]
X_90_Width       = 9.8[us]
X_Acq_Time       = 0.83361792[s]
X_Angle          = 30[deg]
X_Atn            = 4.1[dB]
X_Pulse          = 3.26666667[us]
Irr_Atn_Dec      = 21.078[dB]
Irr_Atn_Noise   = 20.664[dB]
Irr_Noise        = WALTZ
Irr_Pwidth       = 92[us]
Decoupling       = TRUE
Initial_Wait     = 1[s]
Noe               = TRUE
Noe_Time         = 2[s]
Repetition_Time  = 2.83361792[s]

```

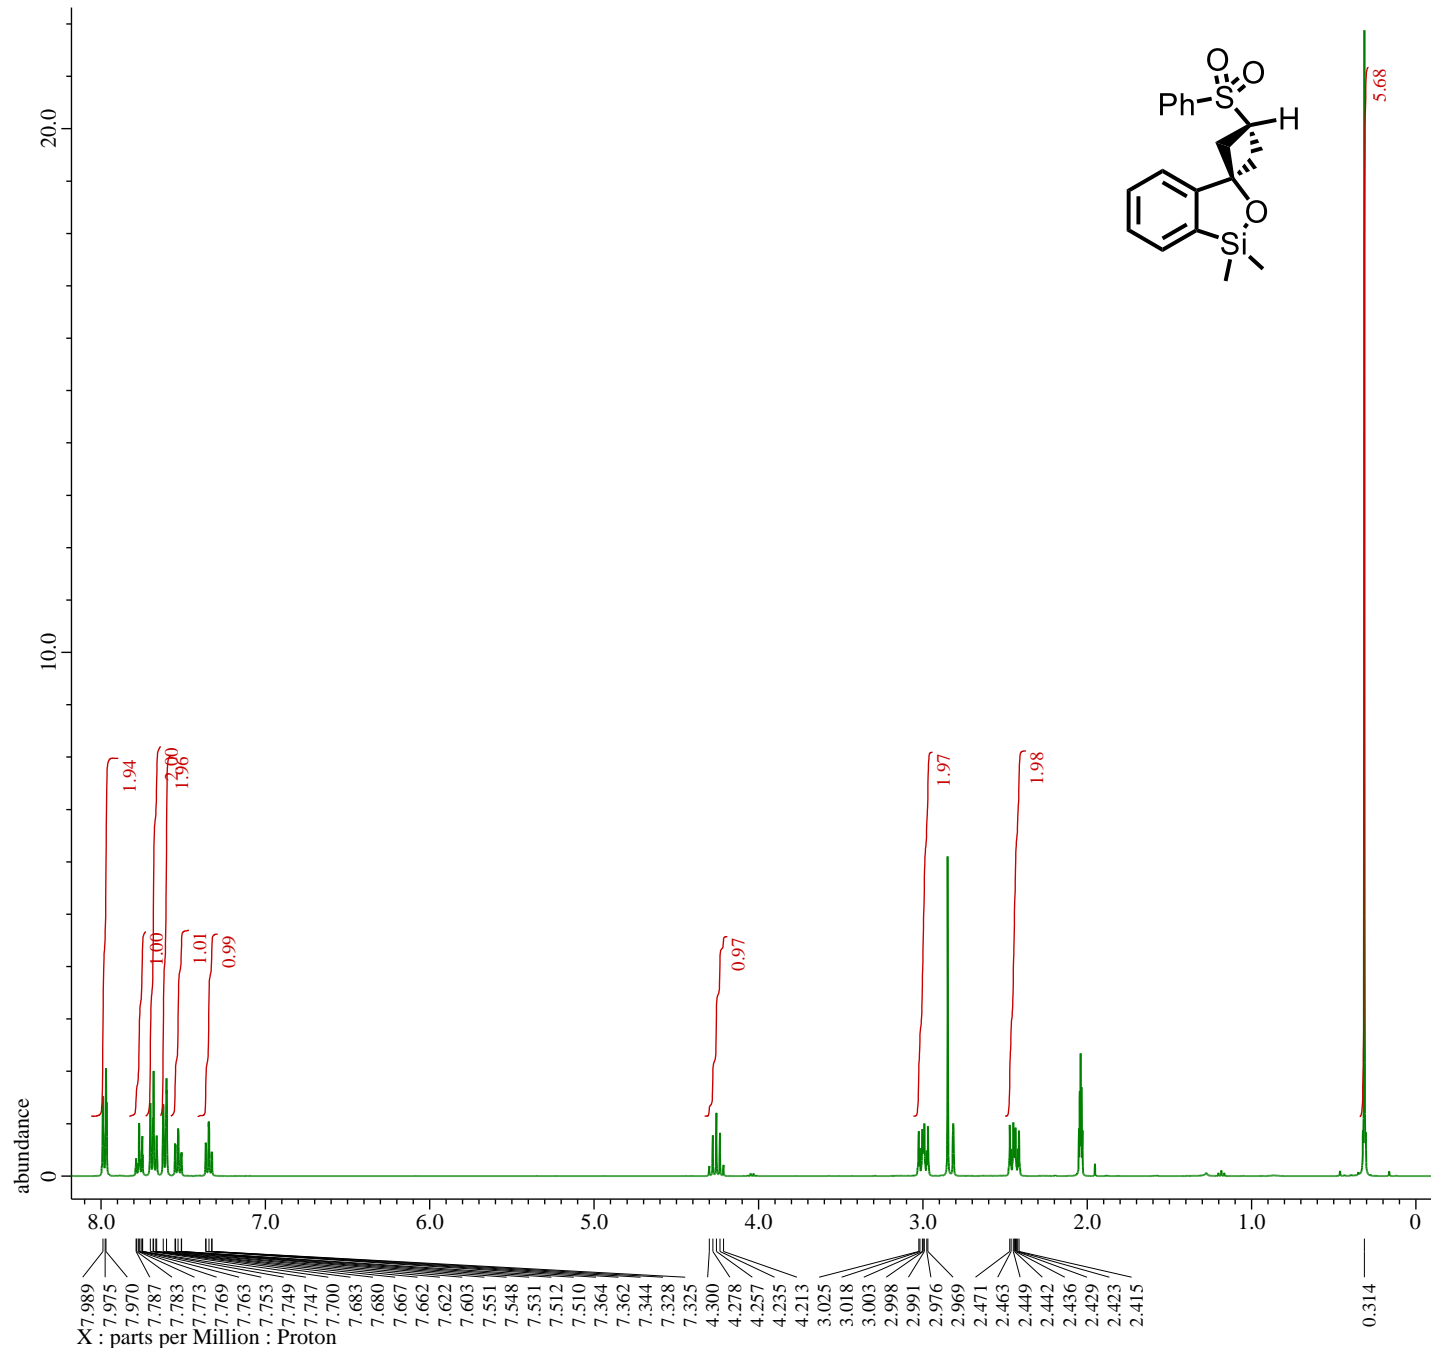

```

---- PROCESSING PARAMETERS ----
dc_balance( 0, FALSE )
sexp( 0.2[Hz], 0.0[s] )
trapezoid( 0[%], 0[%], 80[%], 100[%] )
zerofill( 1, TRUE )
fft( 1, TRUE, TRUE )
machinephase
ppm

Filename      = 210699-700 column Acetone
Author       = delta
Experiment   = proton.jxp
Sample_Id    = 210699-700 column Acetone
Solvent      = ACETONE-D6
Actual_Start_Time = 11-FEB-2023 06:03:17
Revision_Time  = 12-FEB-2023 11:51:55

Comment      = single_pulse
Data_Format  = 1D COMPLEX
Dim_Size     = 13107
X_Domain    = Proton
Dim_Title   = Proton
Dim_Units   = [ppm]
Dimensions  = X
Site        = ECS 400
Spectrometer = DELTA2_NMR

Field_Strength = 9.389766[T] (400[MHz])
X_Acq_Duration = 2.18365952[s]
X_Domain       = 1H
X_Freq        = 399.78219838[MHz]
X_Offset      = 5[ppm]
X_Points      = 16384
X_Prescans    = 1
X_Resolution  = 0.45794685[Hz]
X_Sweep       = 7.5030012[kHz]
X_Sweep_Clippped = 6.00240096[kHz]
Irr_Domain    = Proton
Irr_Freq     = 399.78219838[MHz]
Irr_Offset   = 5[ppm]
Tri_Domain   = Proton
Tri_Freq    = 399.78219838[MHz]
Tri_Offset  = 5[ppm]
Clipped     = FALSE
Scans       = 16
Total_Scans = 16

Relaxation_Delay = 5[s]
Recvr_Gain      = 40
Temp_Get       = 20.3[dC]
X_90_Width    = 12.4[us]
X_Acq_Time    = 2.18365952[s]
X_Angle       = 45[deg]
X_Atn         = 3[dB]
X_Pulse       = 6.2[us]
Irr_Mode      = Off
Tri_Mode      = Off
Dante_Presat  = FALSE
Initial_Wait  = 1[s]
Repetition_Time = 7.18365952[s]

```

<sup>1</sup>H NMR spectrum of **4** (400 MHz, Acetone-*d*<sub>6</sub>)

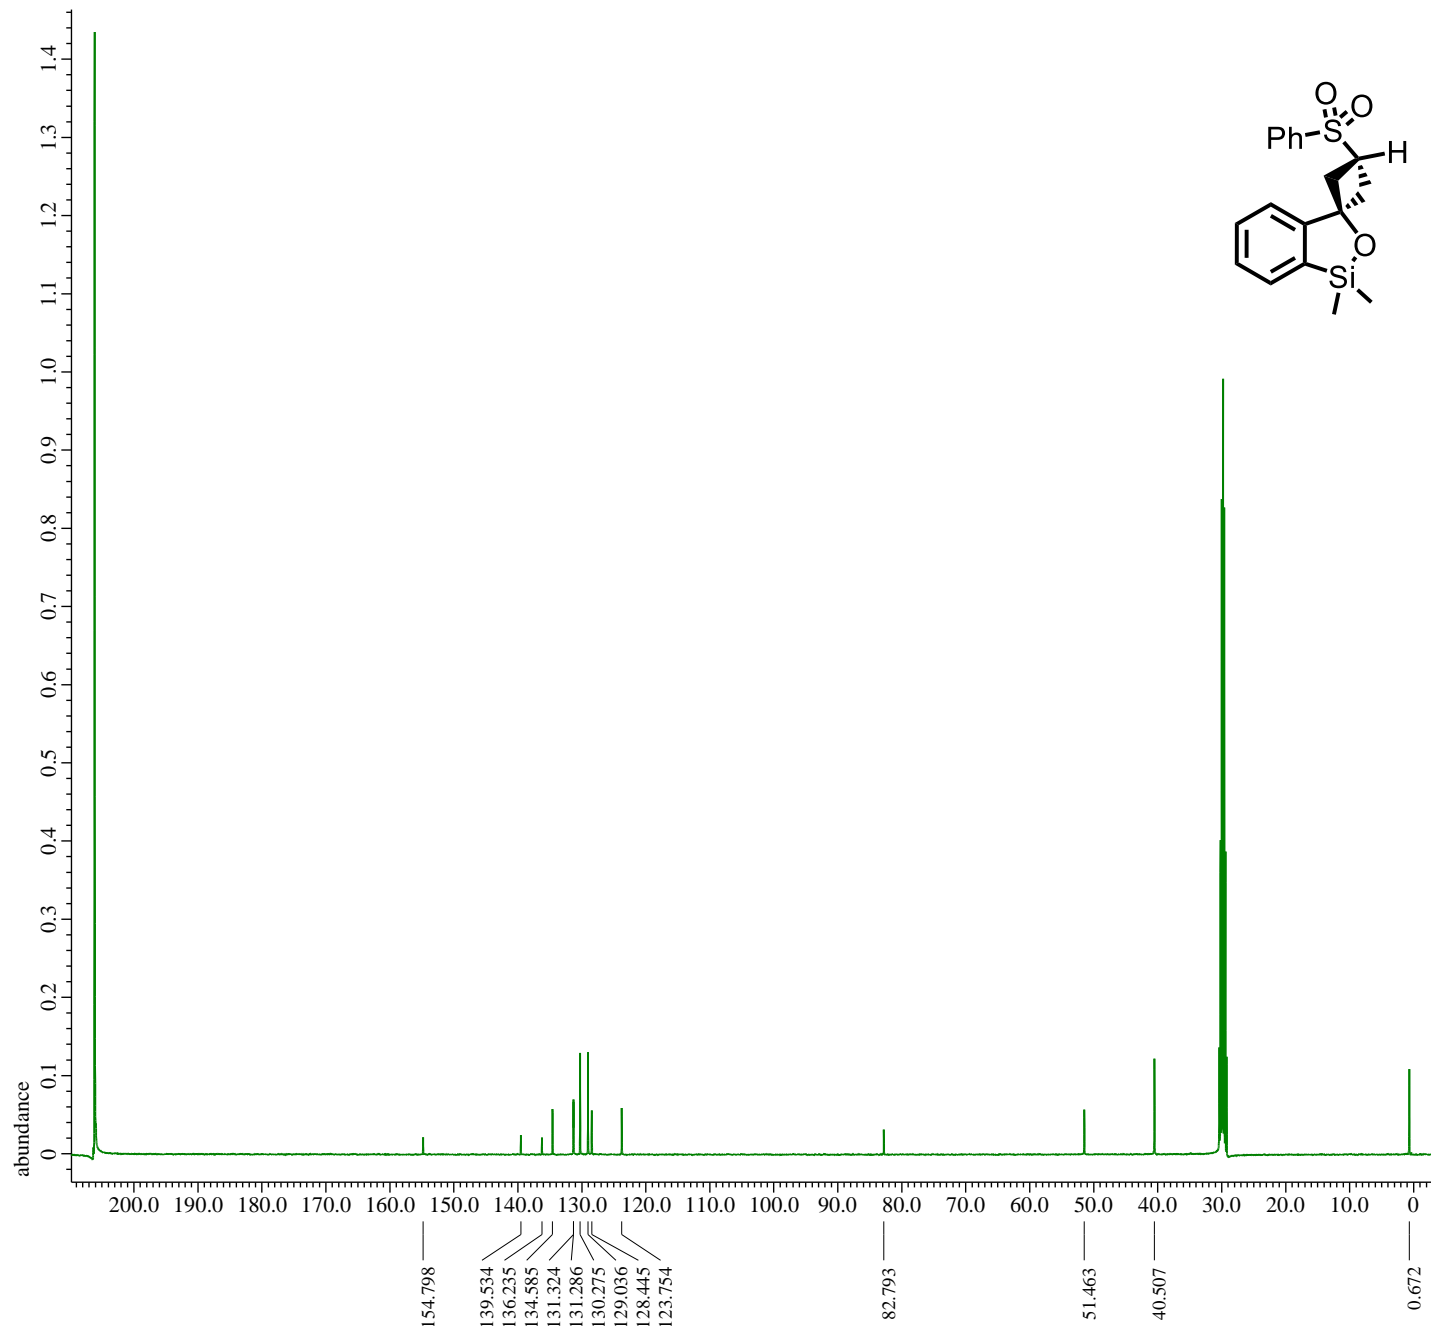

```

---- PROCESSING PARAMETERS ----
dc_balance( 0, FALSE )
sexp( 2.0[Hz], 0.0[s] )
trapezoid( 0[%], 0[%], 80[%], 100[%] )
zerofill( 1, TRUE )
fft( 1, TRUE, TRUE )
machinephase
ppm

Filename      = 210699-700 column Acetone
Author       = delta
Experiment   = carbon.jxp
Sample_Id    = 210699-700 column Acetone
Solvent      = ACETONE-D6
Actual_Start_Time = 11-FEB-2023 06:06:48
Revision_Time  = 13-DEC-2023 15:09:04

Comment      = single pulse decoupled ga
Data_Format  = 1D COMPLEX
Dim_Size     = 26214
X_Domain     = Carbon
Dim_Title    = Carbon13
Dim_Units    = [ppm]
Dimensions   = X
Site         = ECS 400
Spectrometer = DELTA2_NMR

Field_Strength = 9.389766[T] (400[MHz])
X_Acq_Duration = 1.04333312[s]
X_Domain       = 13C
X_Freq        = 100.52530333[MHz]
X_Offset      = 100[ppm]
X_Points      = 32768
X_Prescans    = 4
X_Resolution  = 0.95846665[Hz]
X_Sweep       = 31.40703518[kHz]
X_Sweep_Clipped = 25.12562814[kHz]
Irr_Domain    = Proton
Irr_Freq      = 399.78219838[MHz]
Irr_Offset    = 5[ppm]
Clipped       = FALSE
Scans         = 2500
Total_Scans   = 2500

Relaxation_Delay = 2[s]
Recvr_Gain       = 50
Temp_Get        = 20.5[dc]
X_90_Width      = 9[us]
X_Acq_Time      = 1.04333312[s]
X_Angle         = 30[deg]
X_Atn           = 4.7[dB]
X_Pulse         = 3[us]
Irr_Atn_Dec     = 22.346[dB]
Irr_Atn_No     = 22.346[dB]
Irr_Noise      = WALTZ
Irr_Pwidth     = 0.115[ms]
Decoupling      = TRUE
Initial_Wait    = 1[s]
Noe             = TRUE
Noe_Time       = 2[s]
Repetition_Time = 3.04333312[s]

```

X : parts per Million : Carbon13

<sup>13</sup>C NMR spectrum of **4** (101 MHz, Acetone-*d*<sub>6</sub>)
